# Supplementary material for: Copper(i) acetate-catalyzed azide–alkyne cycloaddition for highly efficient preparation of 1-(pyridin-2-yl)-1,2,3-triazoles
Source: Royal Society of Chemistry journal article supplement (doi:10.1039/c2ob06942c), 2012-01-01

**Supporting Online Material for**

**Copper(I) Acetate–Catalyzed Azide–Alkyne Cycloaddition for Highly  
Efficient Preparation of 1-(Pyridin-2-yl)-1,2,3-Triazoles**

Qun Zhang, Xinyan Wang,\* Chuanjie Cheng, Rui Zhu, Nan Liu, Yuefei Hu\*

*Department of Chemistry, Tsinghua University, Beijing 100084, P. R. China*

[wangxinyan@mail.tsinghua.edu.cn](mailto:wangxinyan@mail.tsinghua.edu.cn), [yfh@mail.tsinghua.edu.cn](mailto:yfh@mail.tsinghua.edu.cn),

**List of  $^1\text{H}$  NMR and  $^{13}\text{C}$  NMR spectra for compounds 1a-z, 14-15.**

|         |                               |         |                                  |
|---------|-------------------------------|---------|----------------------------------|
| Page 3  | $^1\text{H}$ NMR of <b>1a</b> | Page 4  | $^{13}\text{C}$ NMR of <b>1a</b> |
| Page 5  | $^1\text{H}$ NMR of <b>1b</b> | Page 6  | $^{13}\text{C}$ NMR of <b>1b</b> |
| Page 7  | $^1\text{H}$ NMR of <b>1c</b> | Page 8  | $^{13}\text{C}$ NMR of <b>1c</b> |
| Page 9  | $^1\text{H}$ NMR of <b>1d</b> | Page 10 | $^{13}\text{C}$ NMR of <b>1d</b> |
| Page 11 | $^1\text{H}$ NMR of <b>1e</b> | Page 12 | $^{13}\text{C}$ NMR of <b>1e</b> |
| Page 13 | $^1\text{H}$ NMR of <b>1f</b> | Page 14 | $^{13}\text{C}$ NMR of <b>1f</b> |
| Page 15 | $^1\text{H}$ NMR of <b>1g</b> | Page 16 | $^{13}\text{C}$ NMR of <b>1g</b> |
| Page 17 | $^1\text{H}$ NMR of <b>1h</b> | Page 18 | $^{13}\text{C}$ NMR of <b>1h</b> |
| Page 19 | $^1\text{H}$ NMR of <b>1i</b> | Page 20 | $^{13}\text{C}$ NMR of <b>1i</b> |
| Page 21 | $^1\text{H}$ NMR of <b>1j</b> | Page 22 | $^{13}\text{C}$ NMR of <b>1j</b> |
| Page 23 | $^1\text{H}$ NMR of <b>1k</b> | Page 24 | $^{13}\text{C}$ NMR of <b>1k</b> |
| Page 25 | $^1\text{H}$ NMR of <b>1l</b> | Page 26 | $^{13}\text{C}$ NMR of <b>1l</b> |
| Page 27 | $^1\text{H}$ NMR of <b>1m</b> | Page 28 | $^{13}\text{C}$ NMR of <b>1m</b> |
| Page 29 | $^1\text{H}$ NMR of <b>1n</b> | Page 30 | $^{13}\text{C}$ NMR of <b>1n</b> |
| Page 31 | $^1\text{H}$ NMR of <b>1o</b> | Page 32 | $^{13}\text{C}$ NMR of <b>1o</b> |
| Page 33 | $^1\text{H}$ NMR of <b>1p</b> | Page 34 | $^{13}\text{C}$ NMR of <b>1p</b> |
| Page 35 | $^1\text{H}$ NMR of <b>1q</b> | Page 36 | $^{13}\text{C}$ NMR of <b>1q</b> |
| Page 37 | $^1\text{H}$ NMR of <b>1r</b> | Page 38 | $^{13}\text{C}$ NMR of <b>1r</b> |
| Page 39 | $^1\text{H}$ NMR of <b>1s</b> | Page 40 | $^{13}\text{C}$ NMR of <b>1s</b> |
| Page 41 | $^1\text{H}$ NMR of <b>1t</b> | Page 42 | $^{13}\text{C}$ NMR of <b>1t</b> |
| Page 43 | $^1\text{H}$ NMR of <b>1u</b> | Page 44 | $^{13}\text{C}$ NMR of <b>1u</b> |
| Page 45 | $^1\text{H}$ NMR of <b>1v</b> | Page 46 | $^{13}\text{C}$ NMR of <b>1v</b> |
| Page 47 | $^1\text{H}$ NMR of <b>1w</b> | Page 48 | $^{13}\text{C}$ NMR of <b>1w</b> |
| Page 49 | $^1\text{H}$ NMR of <b>1x</b> | Page 50 | $^{13}\text{C}$ NMR of <b>1x</b> |
| Page 51 | $^1\text{H}$ NMR of <b>1y</b> | Page 52 | $^{13}\text{C}$ NMR of <b>1y</b> |
| Page 53 | $^1\text{H}$ NMR of <b>1z</b> | Page 54 | $^{13}\text{C}$ NMR of <b>1z</b> |
| Page 55 | $^1\text{H}$ NMR of <b>14</b> | Page 56 | $^{13}\text{C}$ NMR of <b>14</b> |
| Page 57 | $^1\text{H}$ NMR of <b>15</b> | Page 58 | $^{13}\text{C}$ NMR of <b>15</b> |

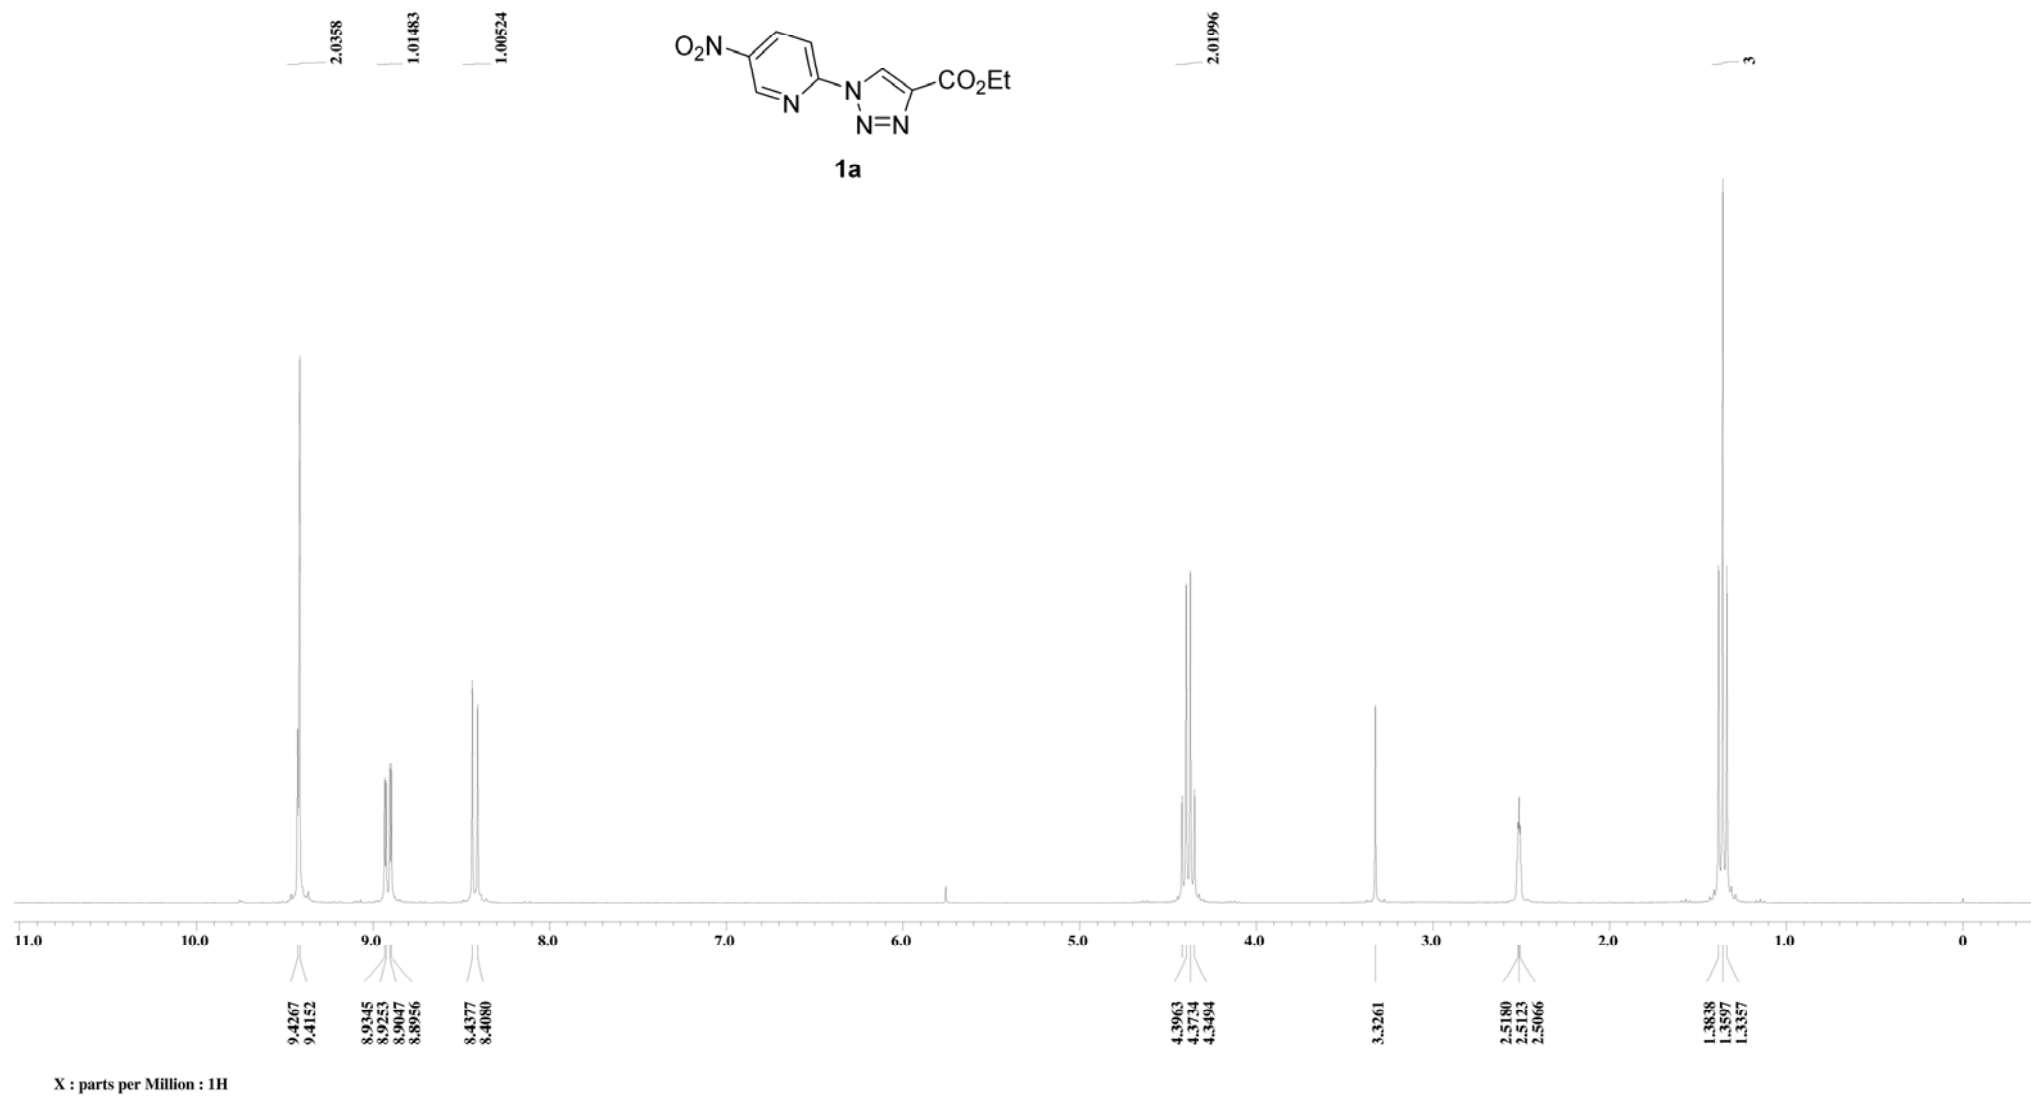

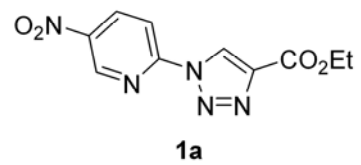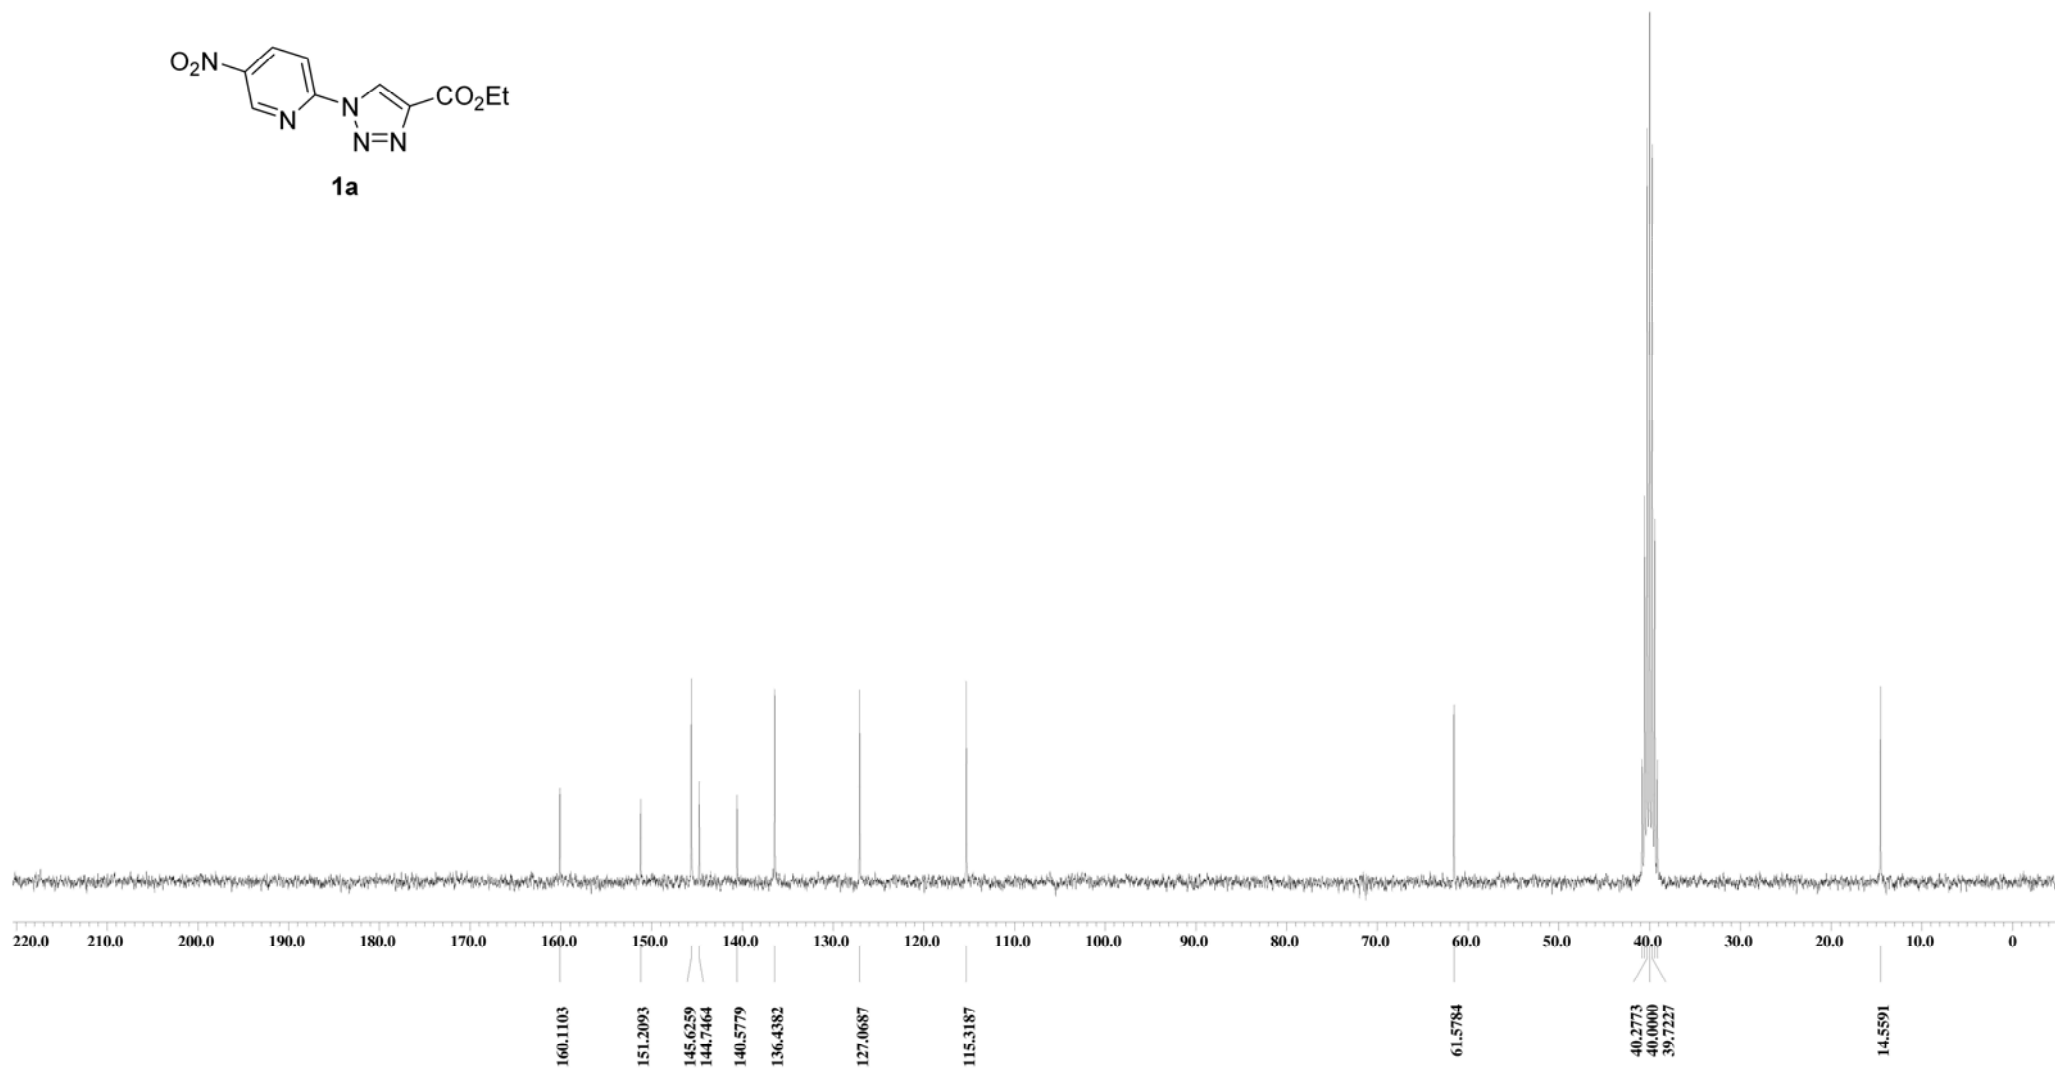

X : parts per Million : <sup>13</sup>C

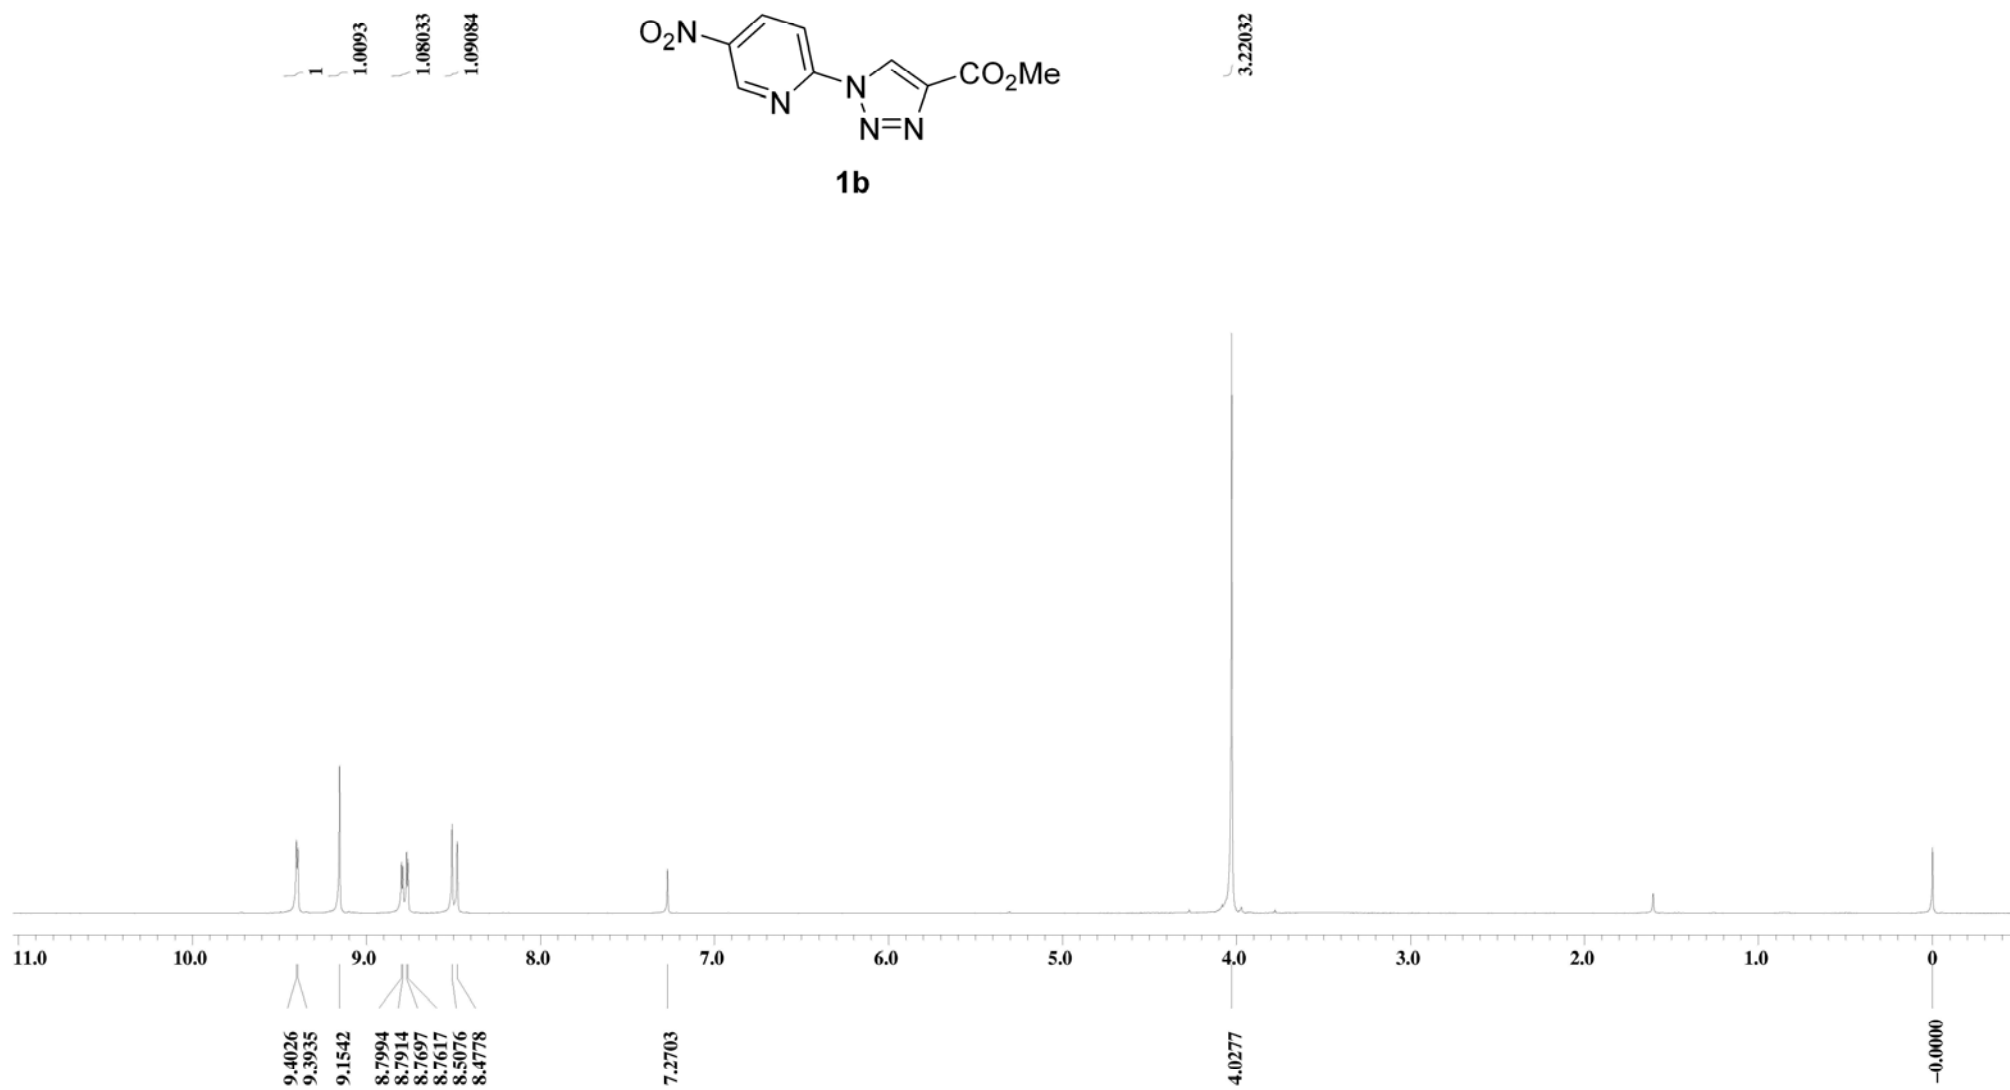

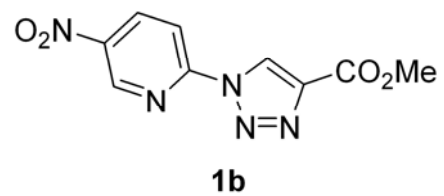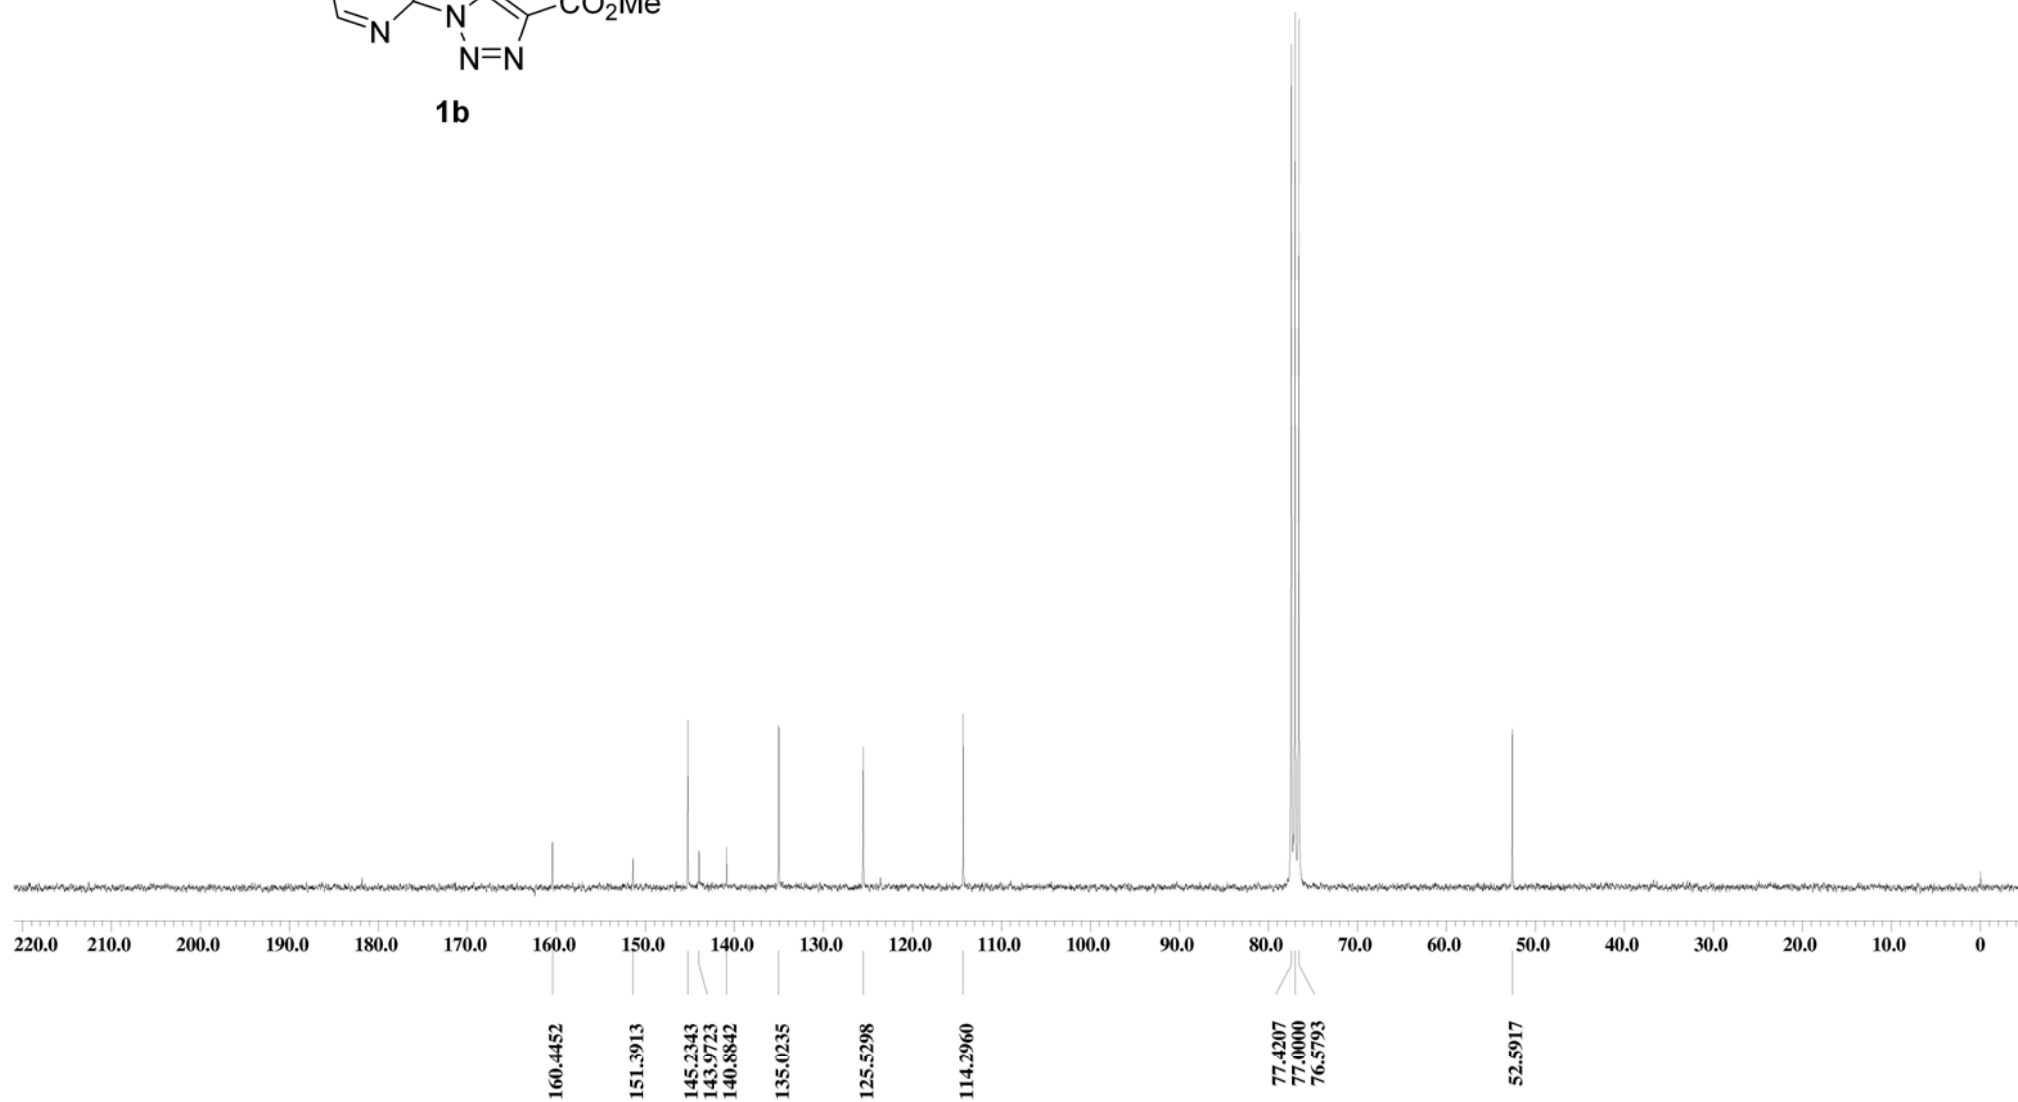

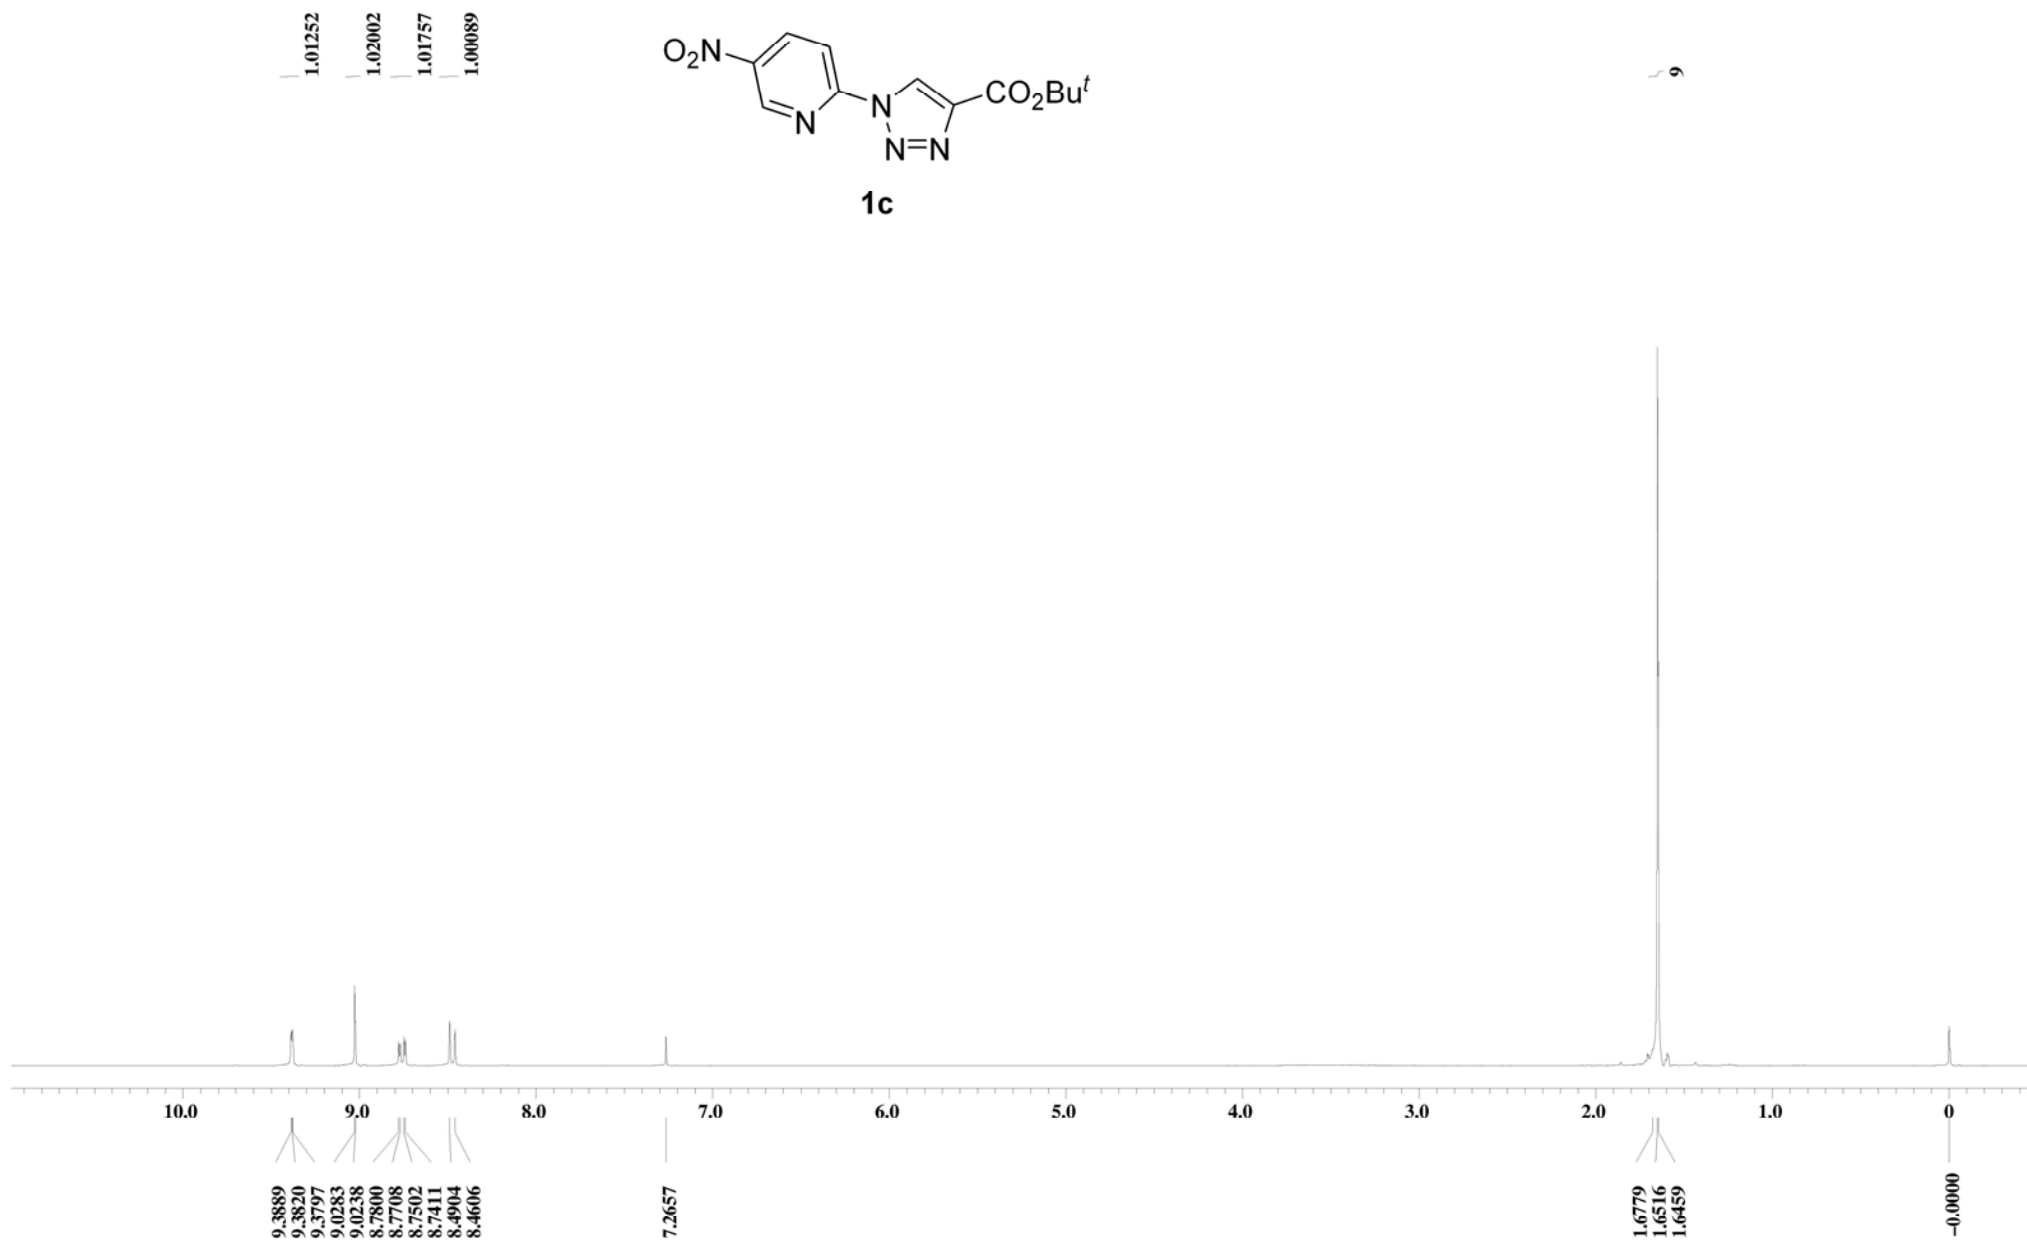

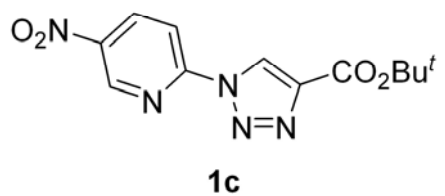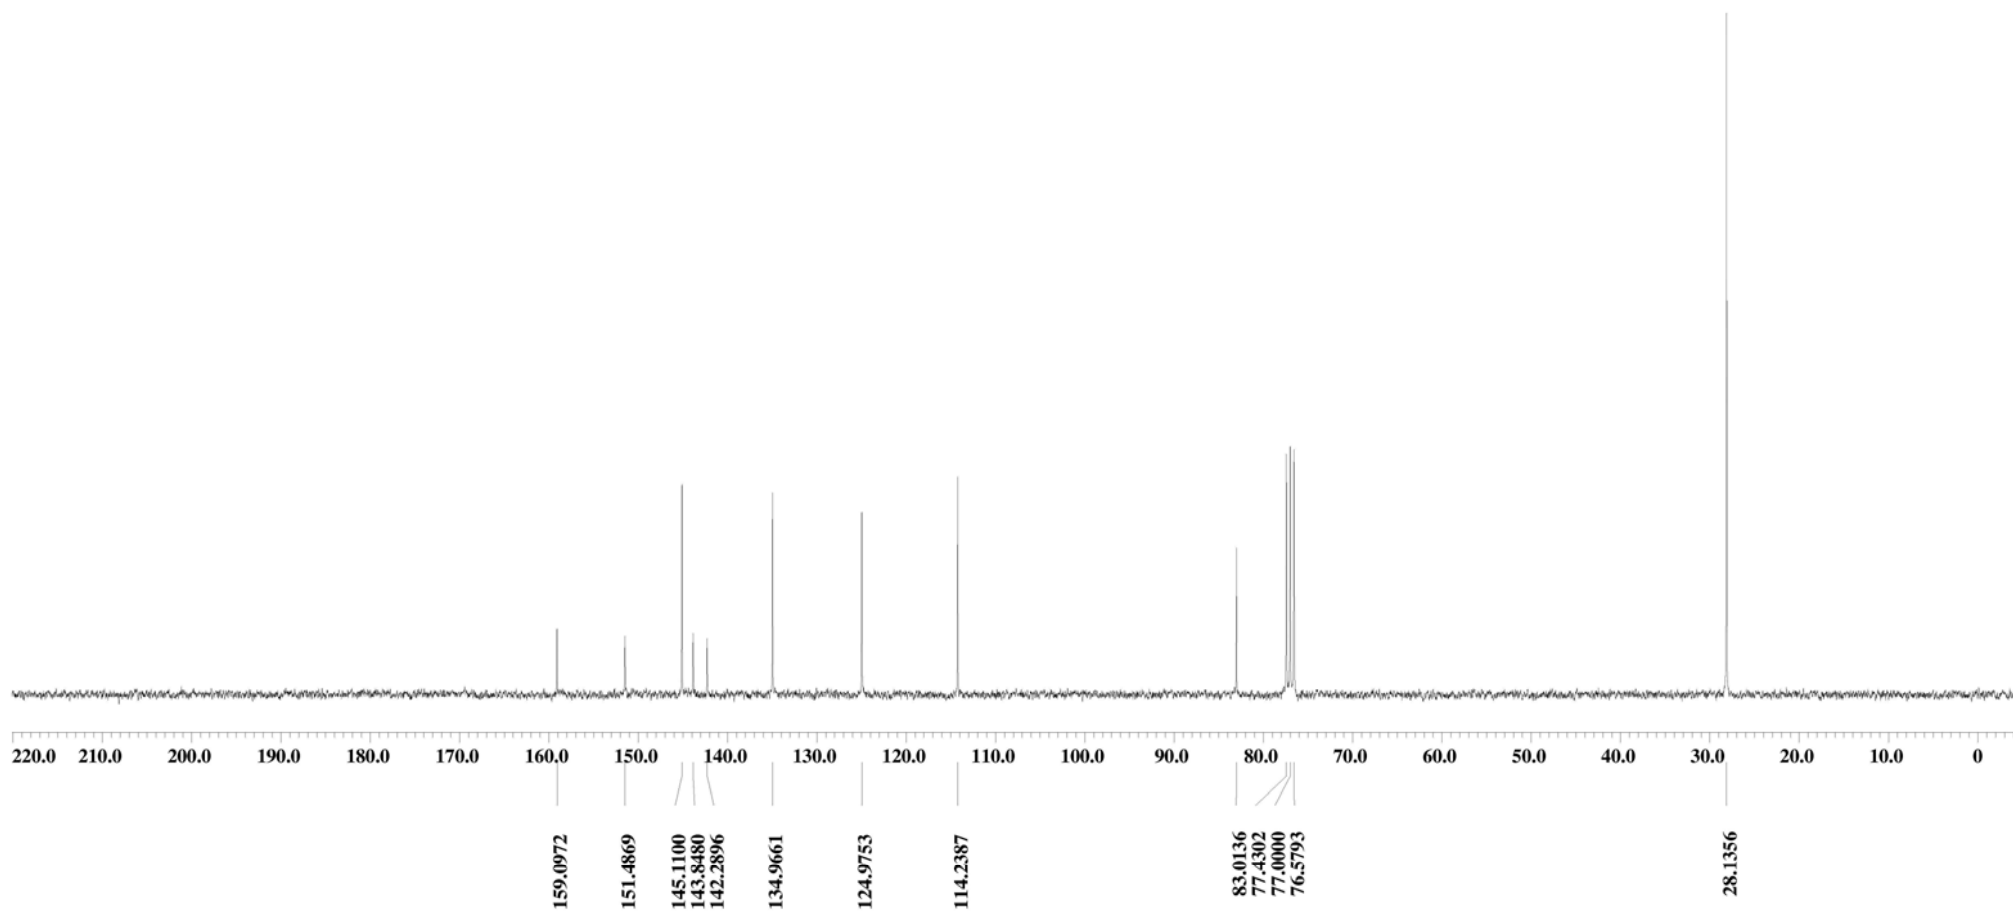



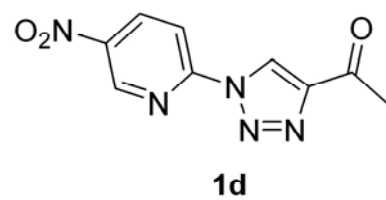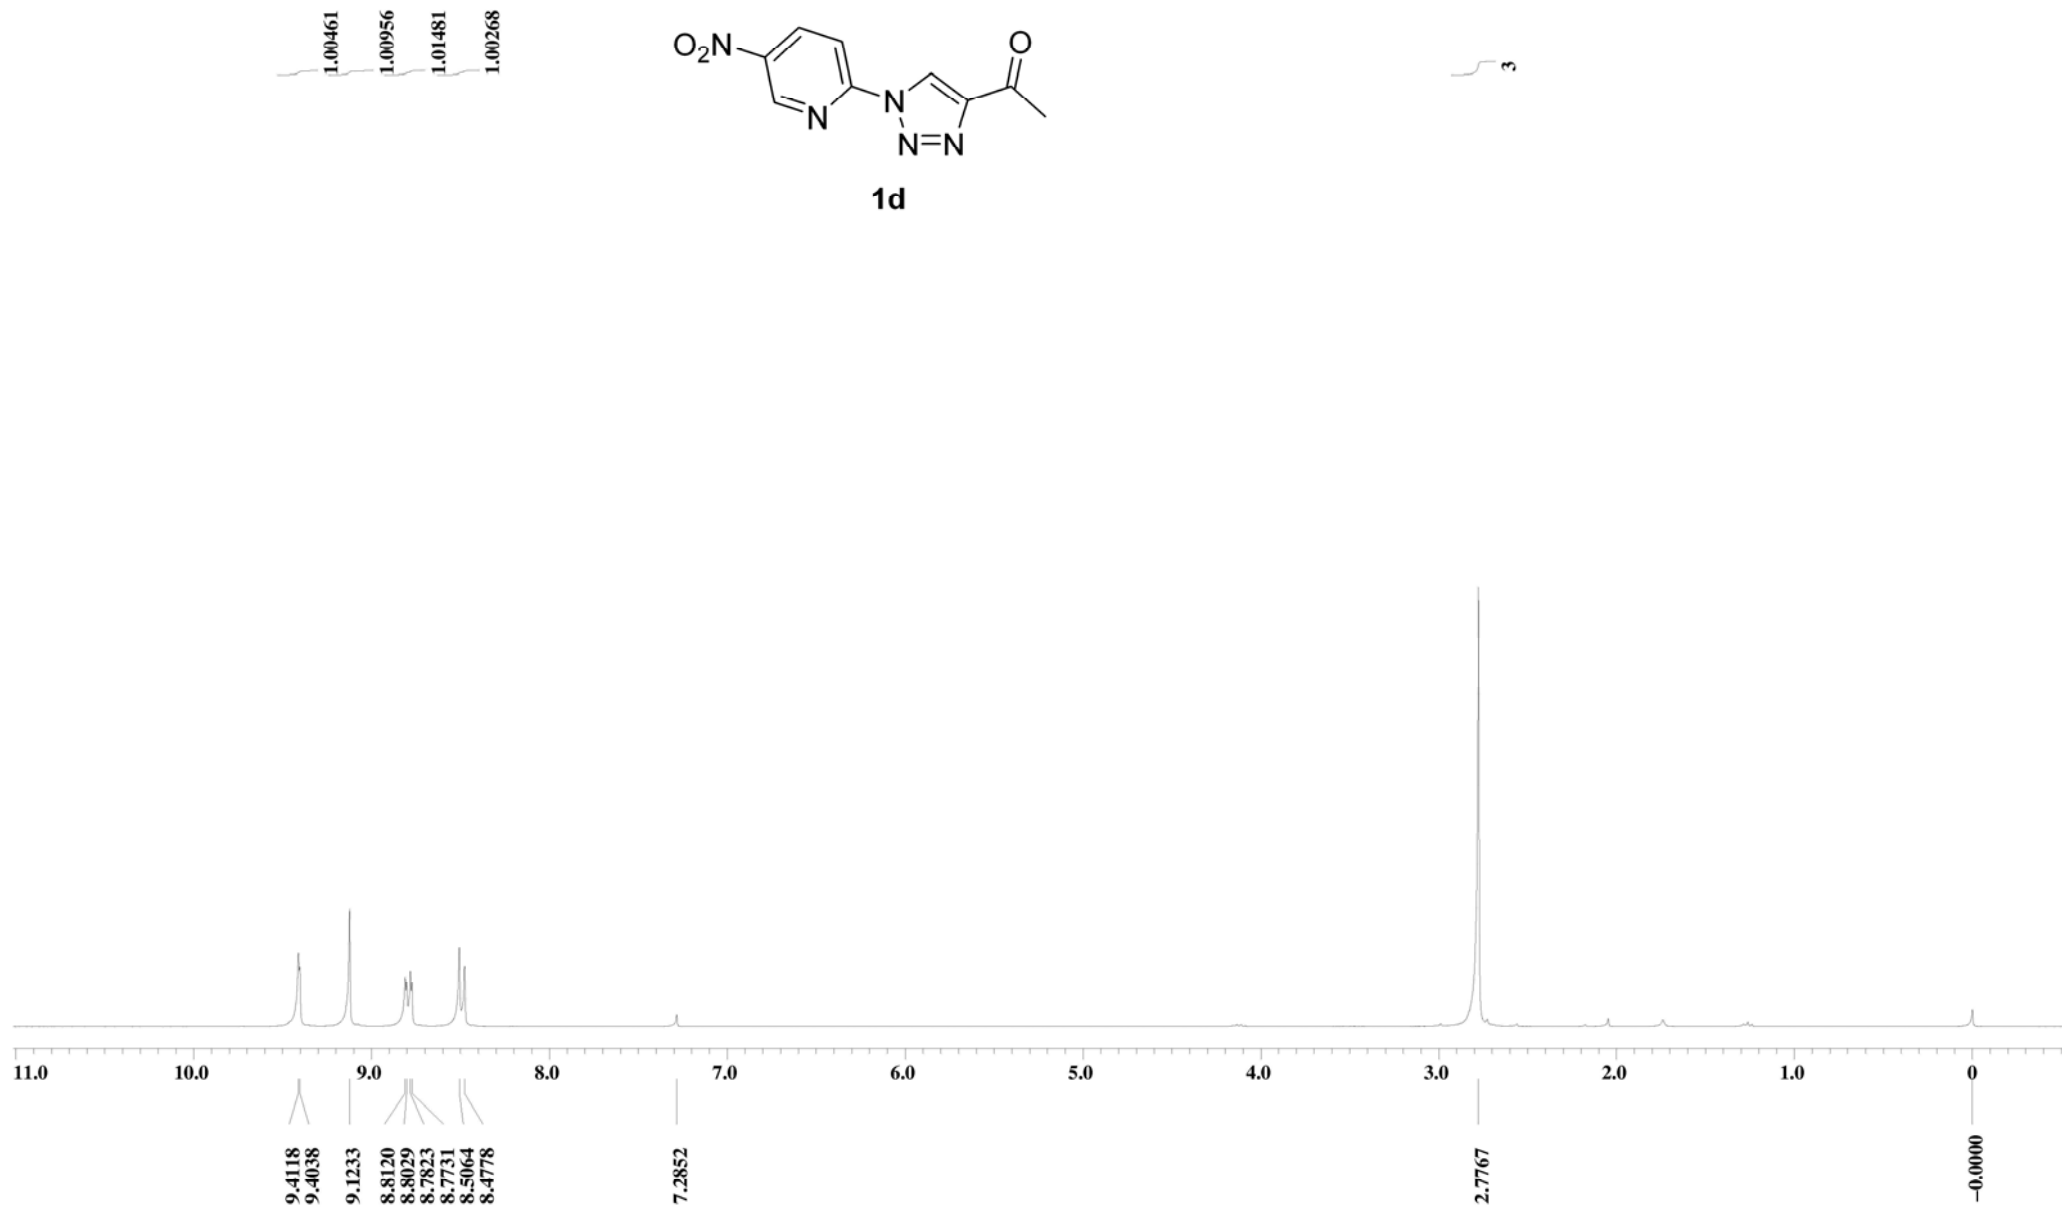

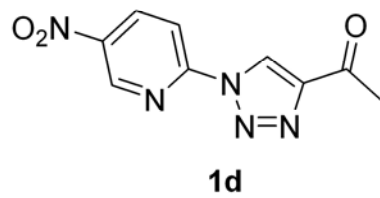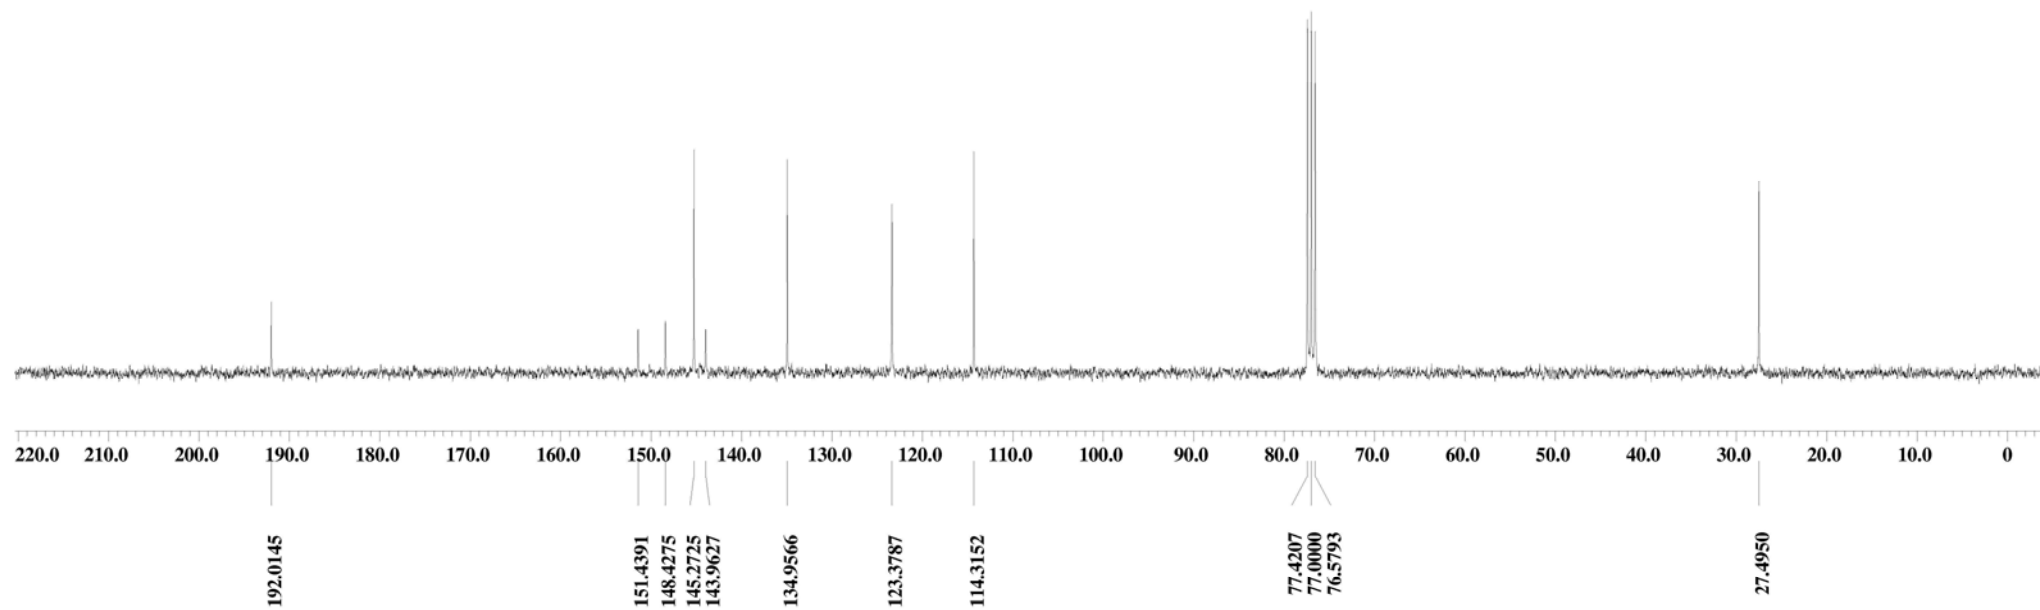

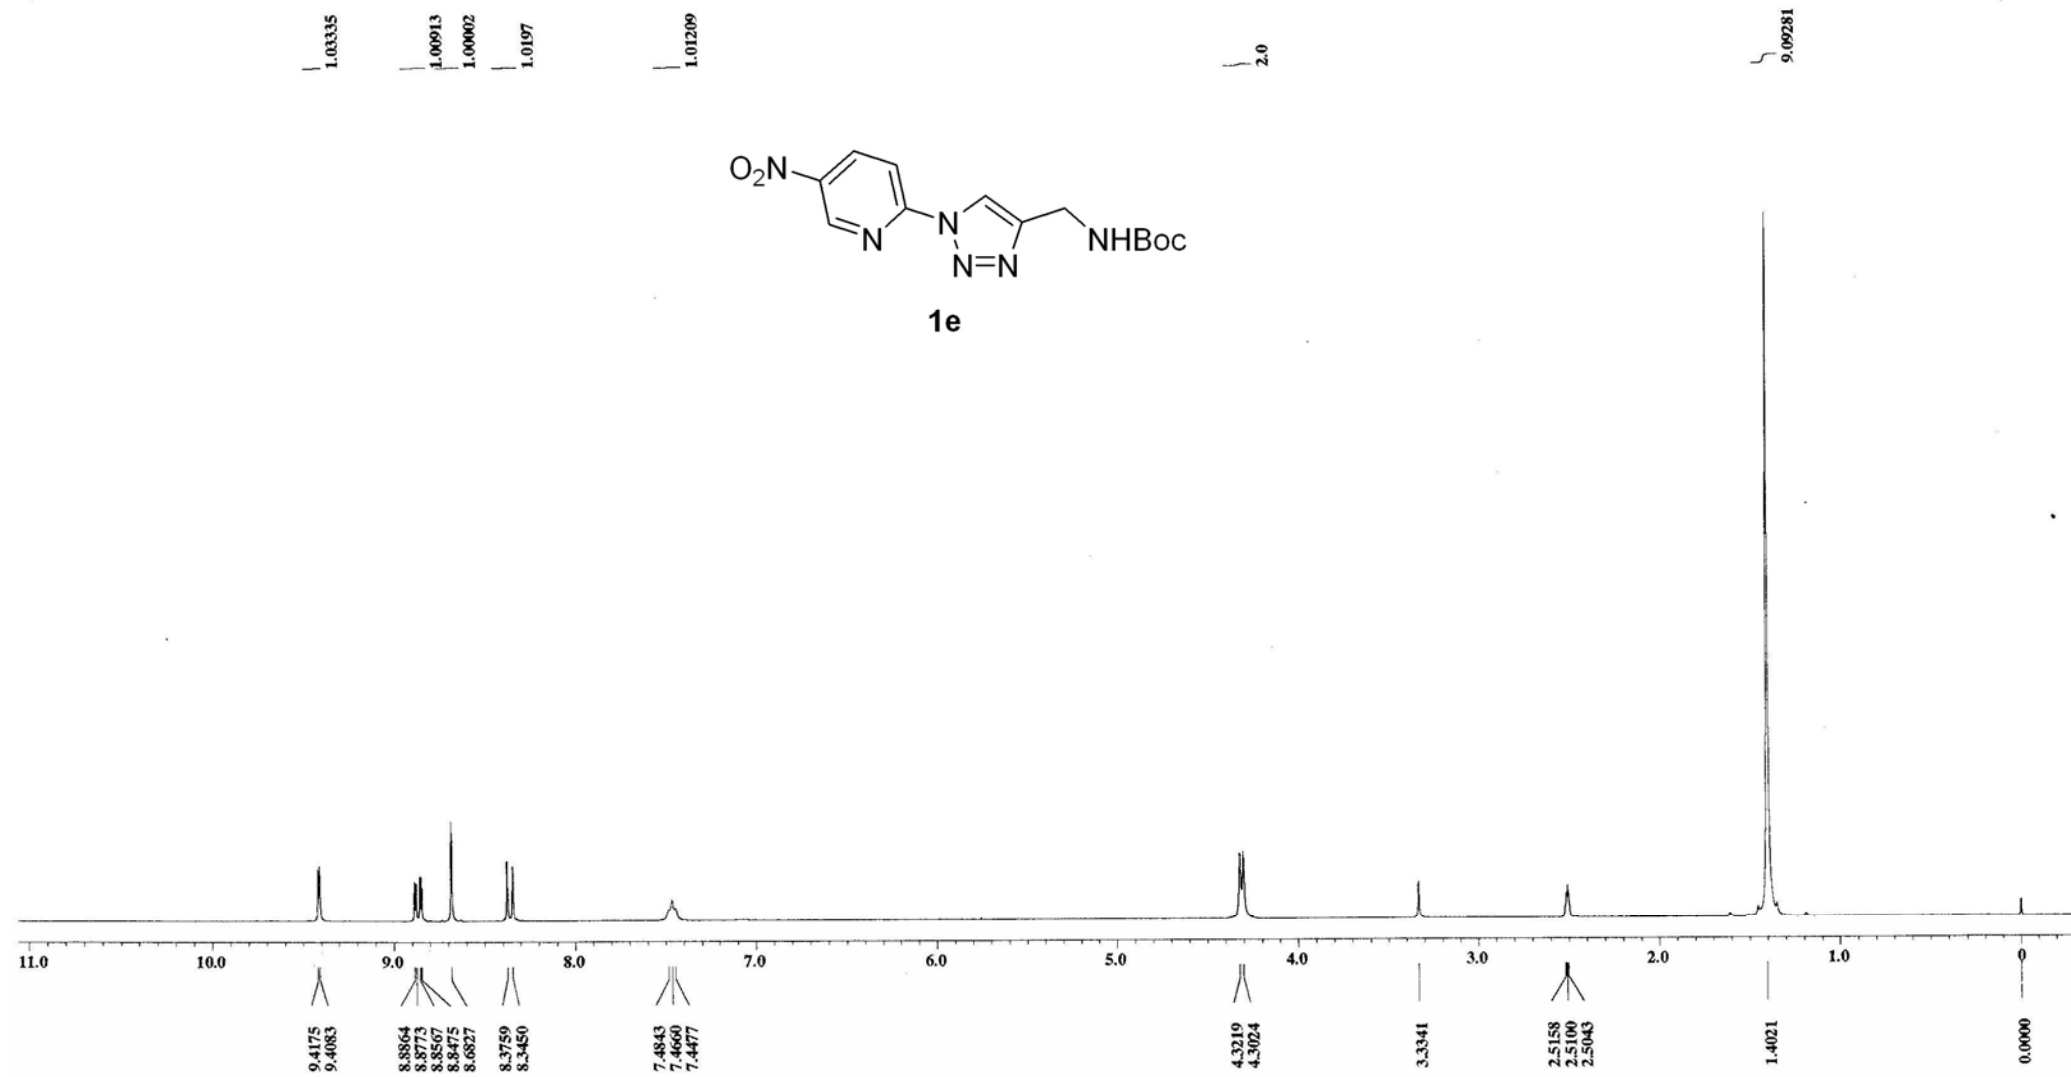

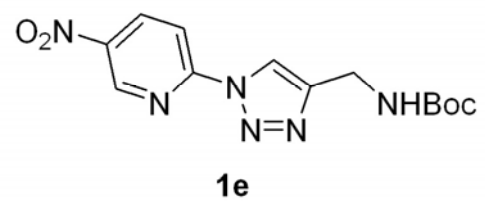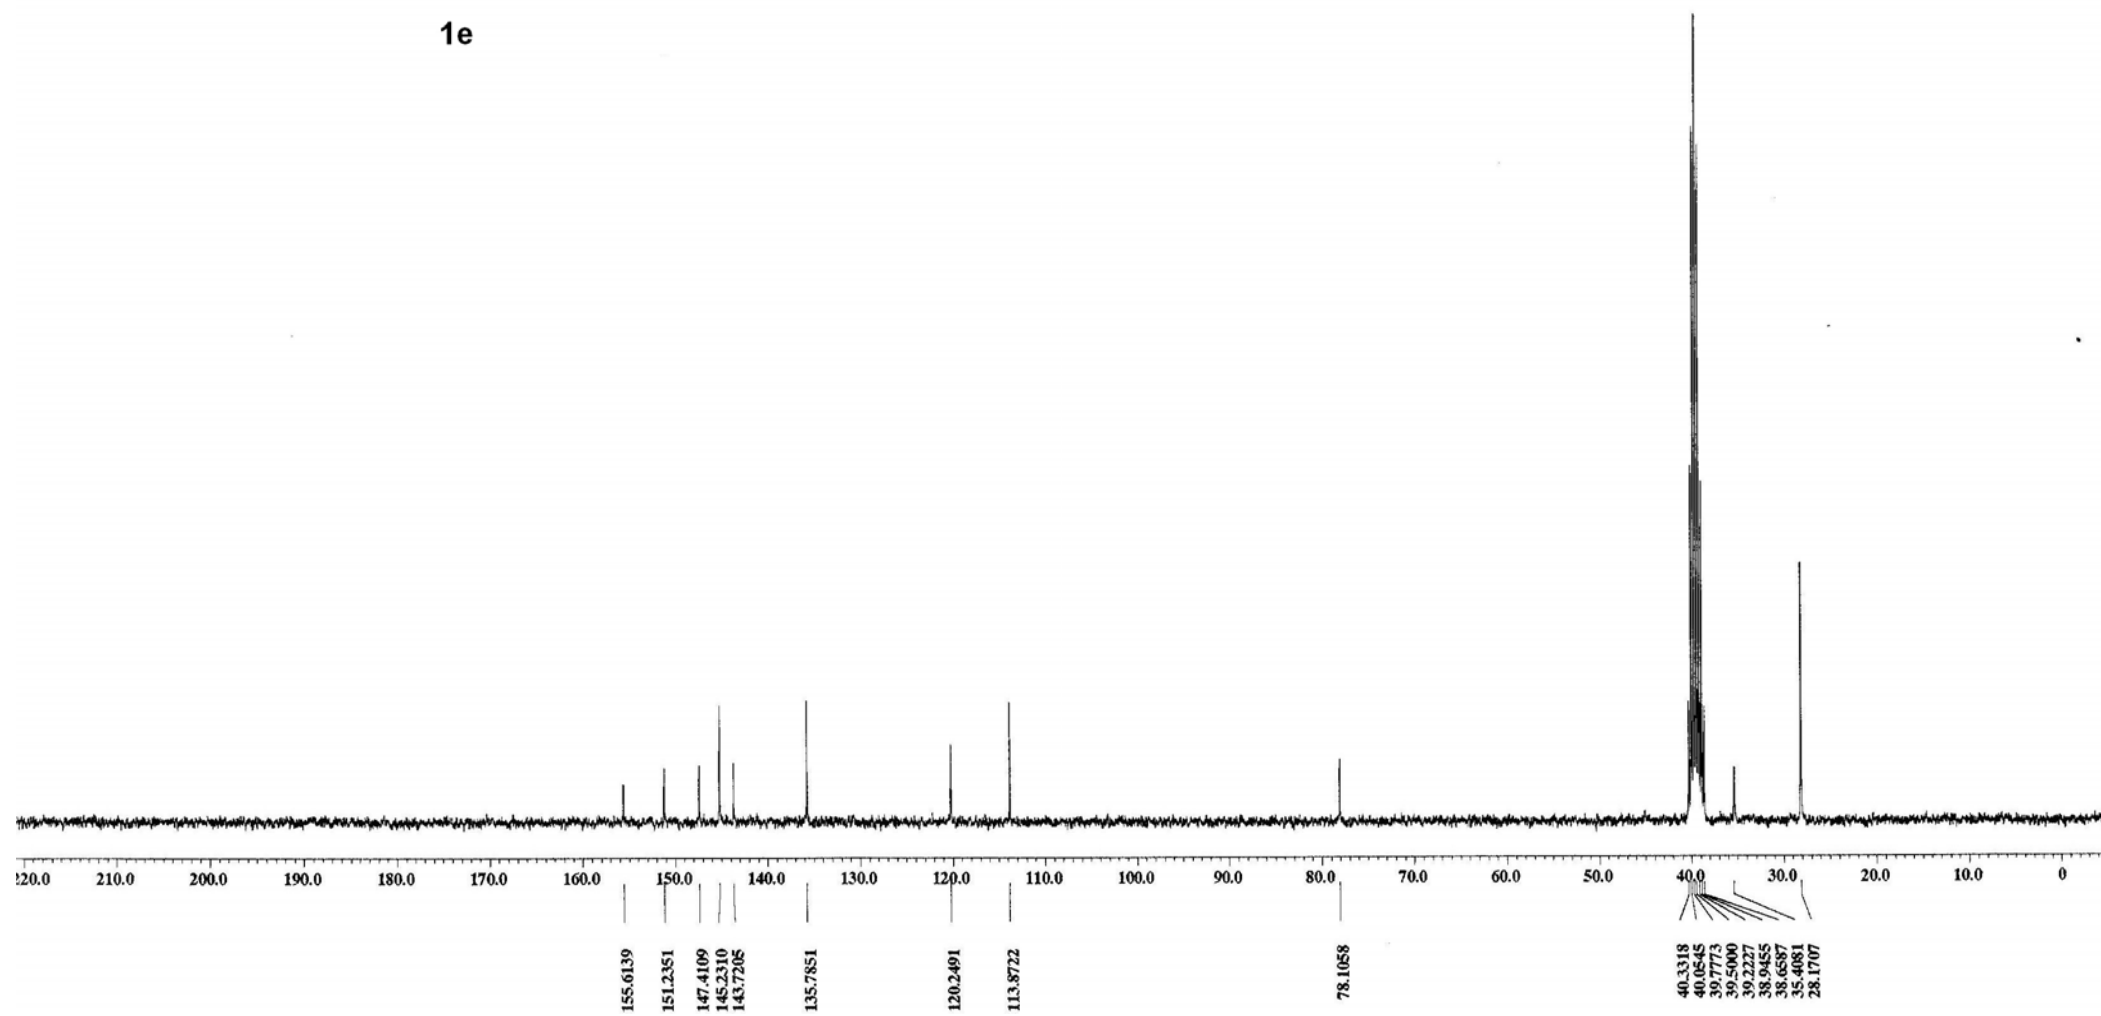

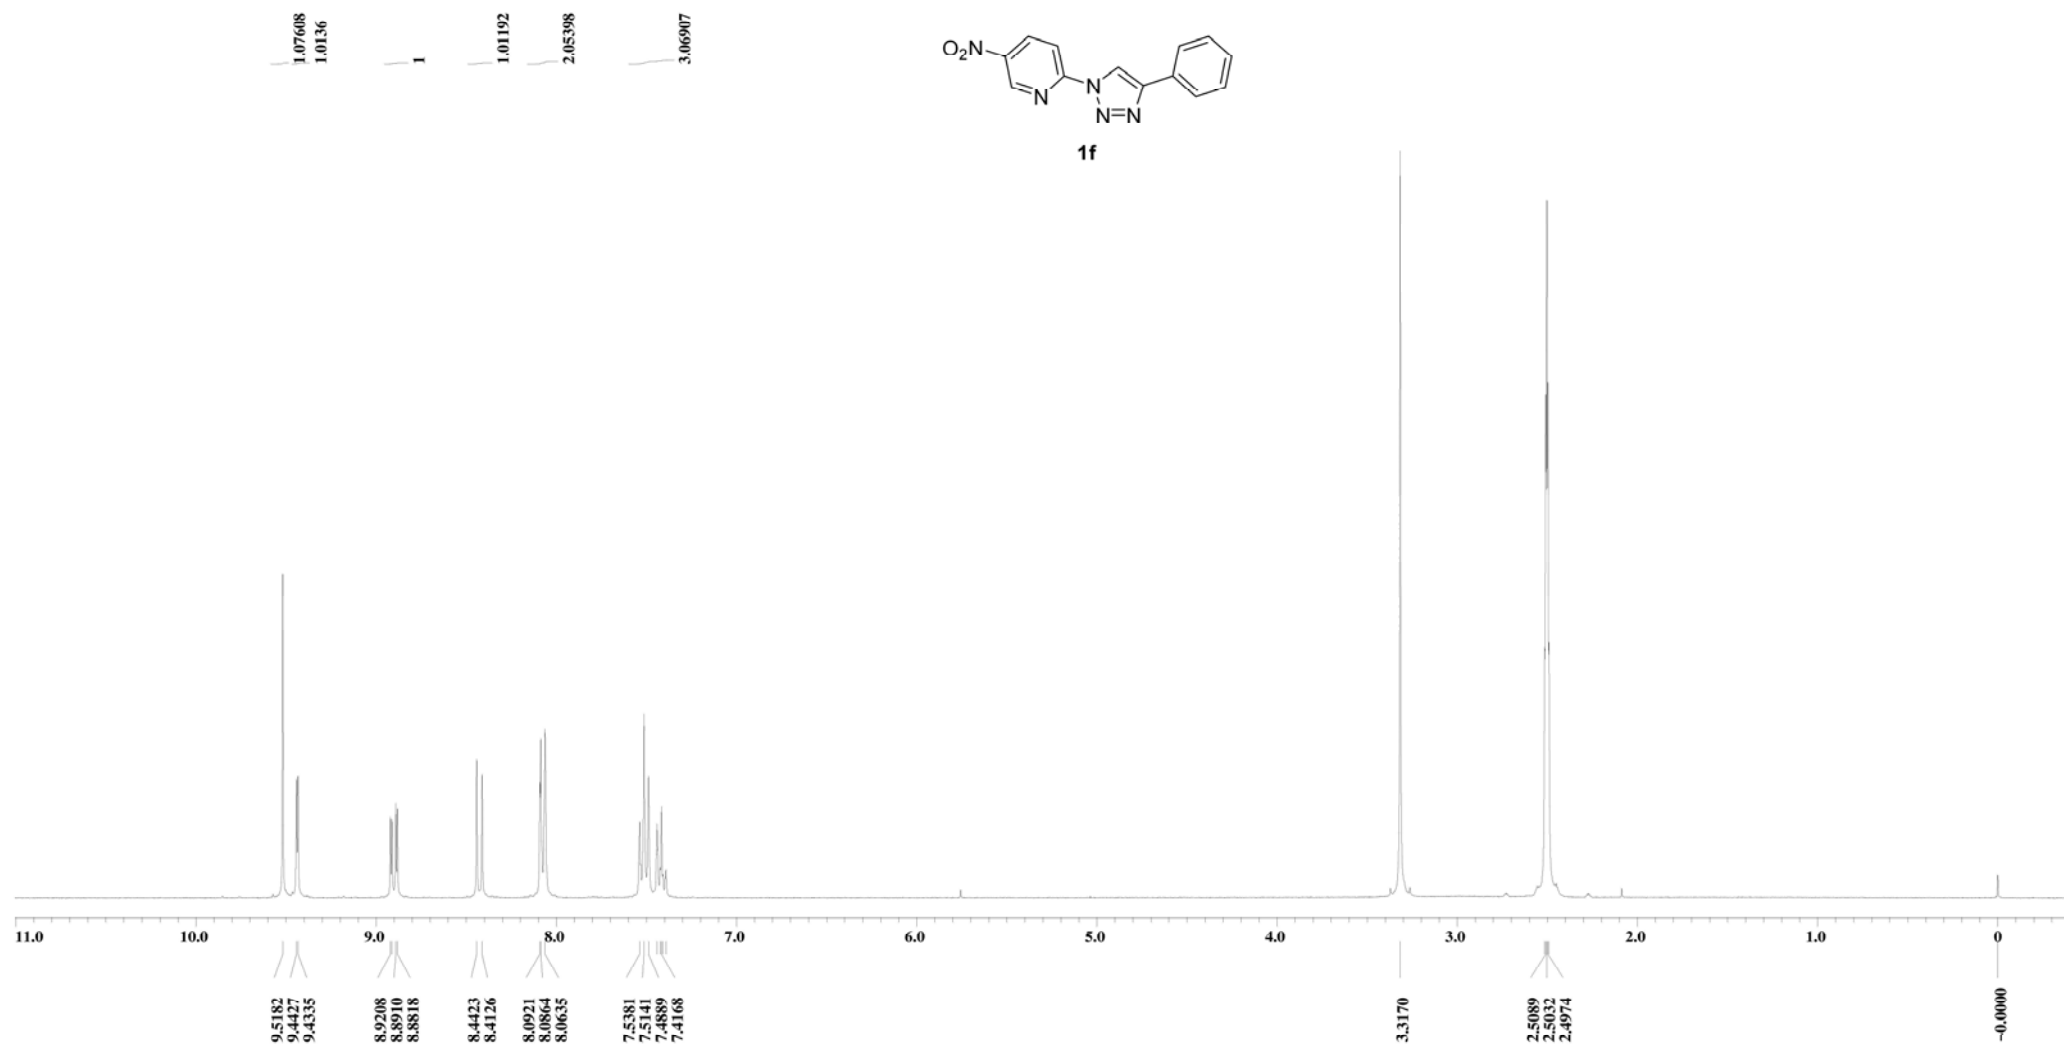

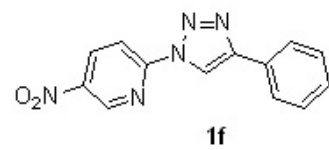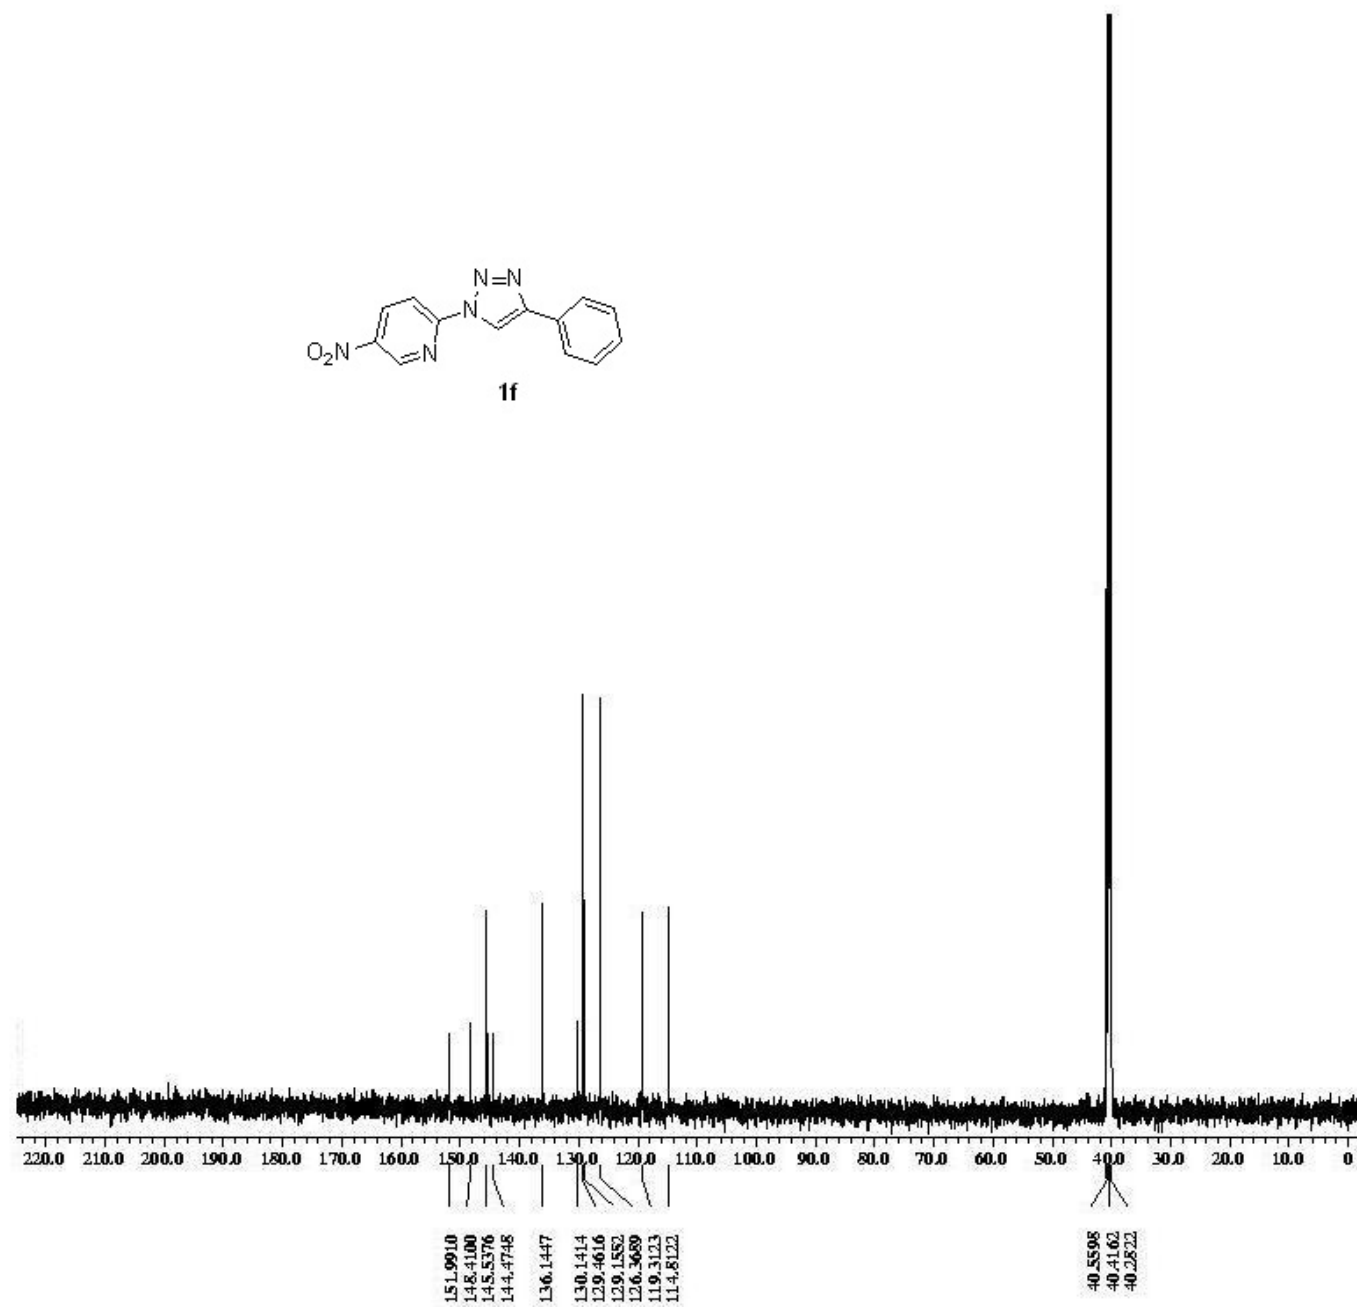

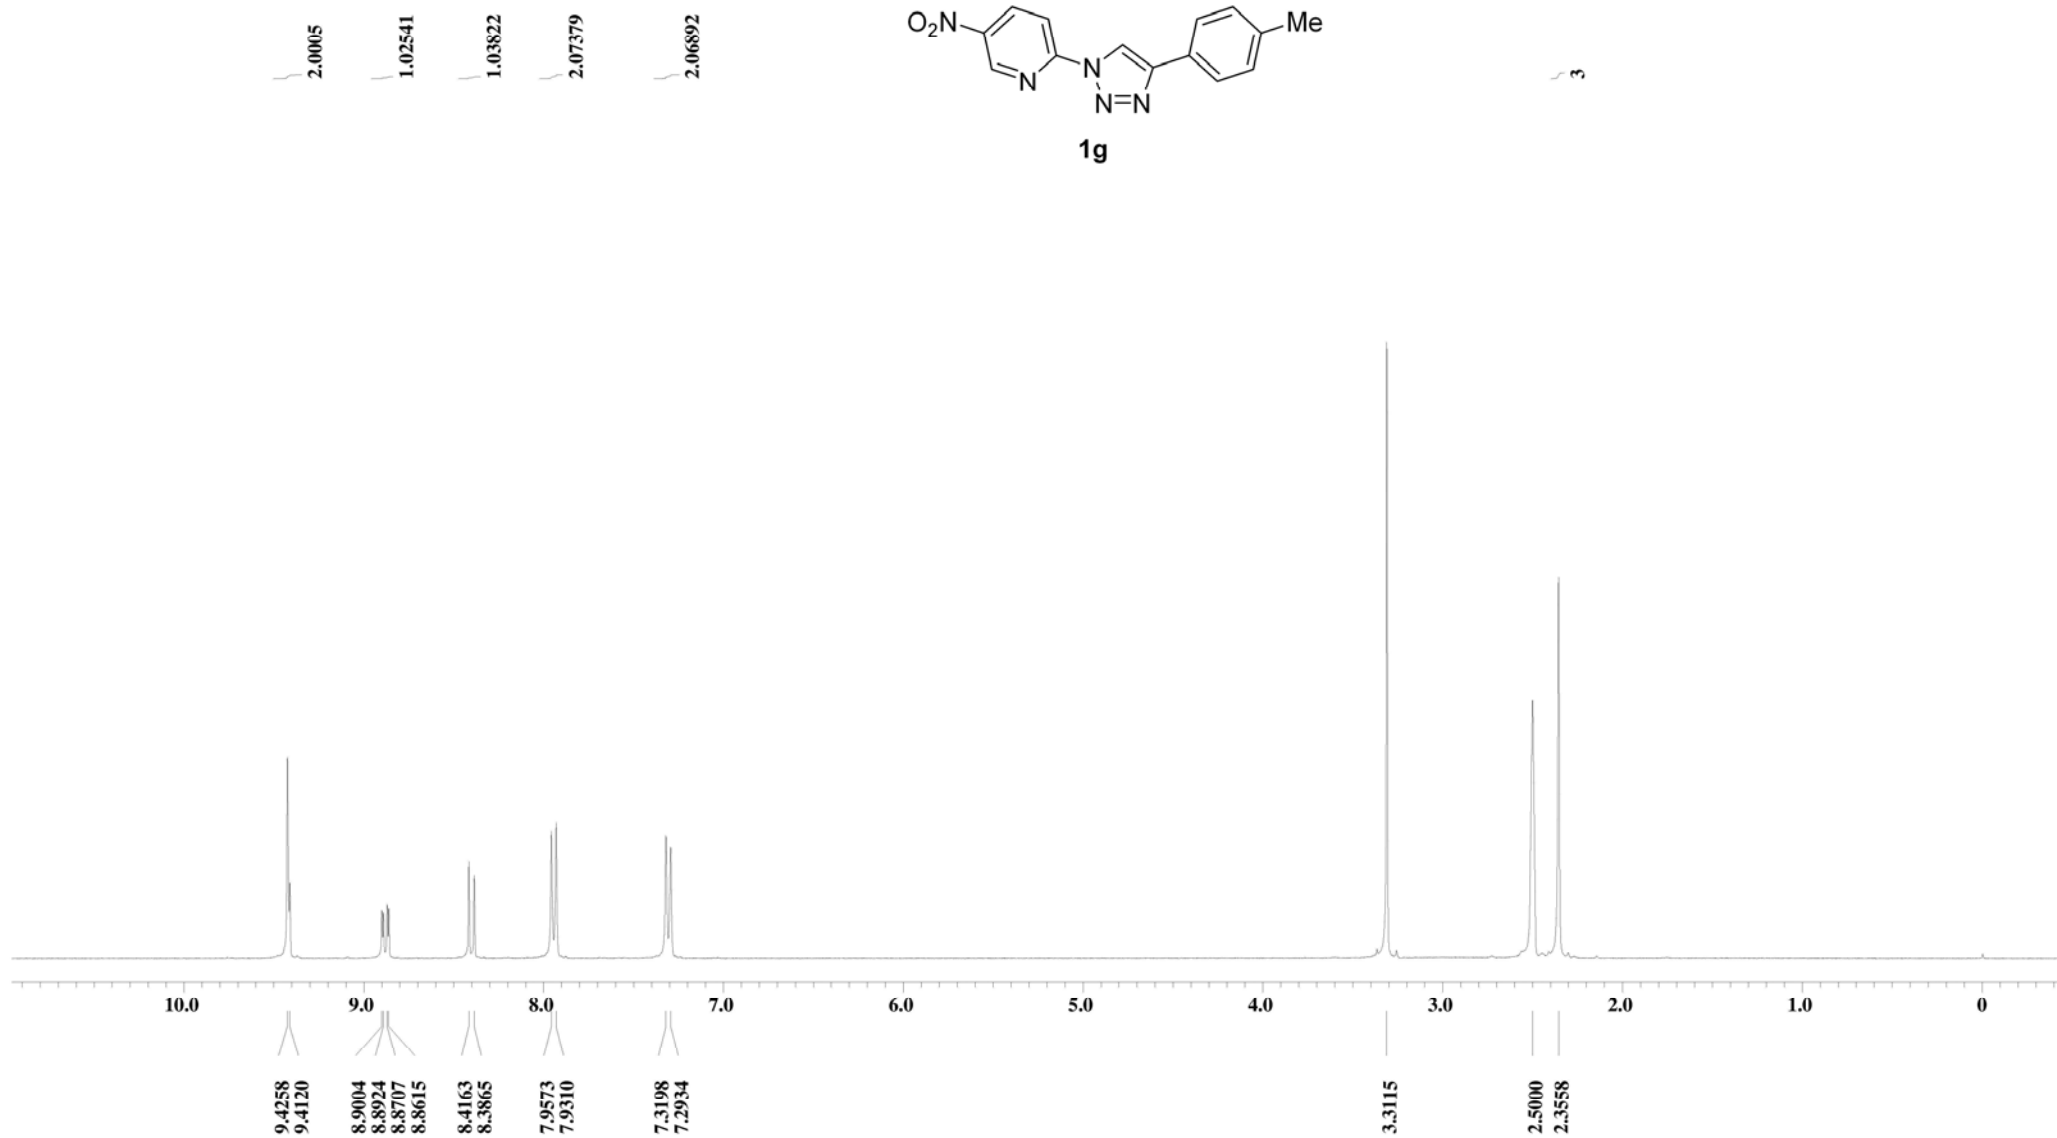

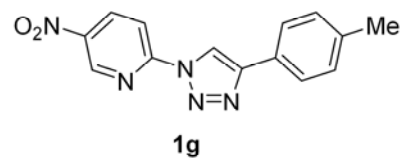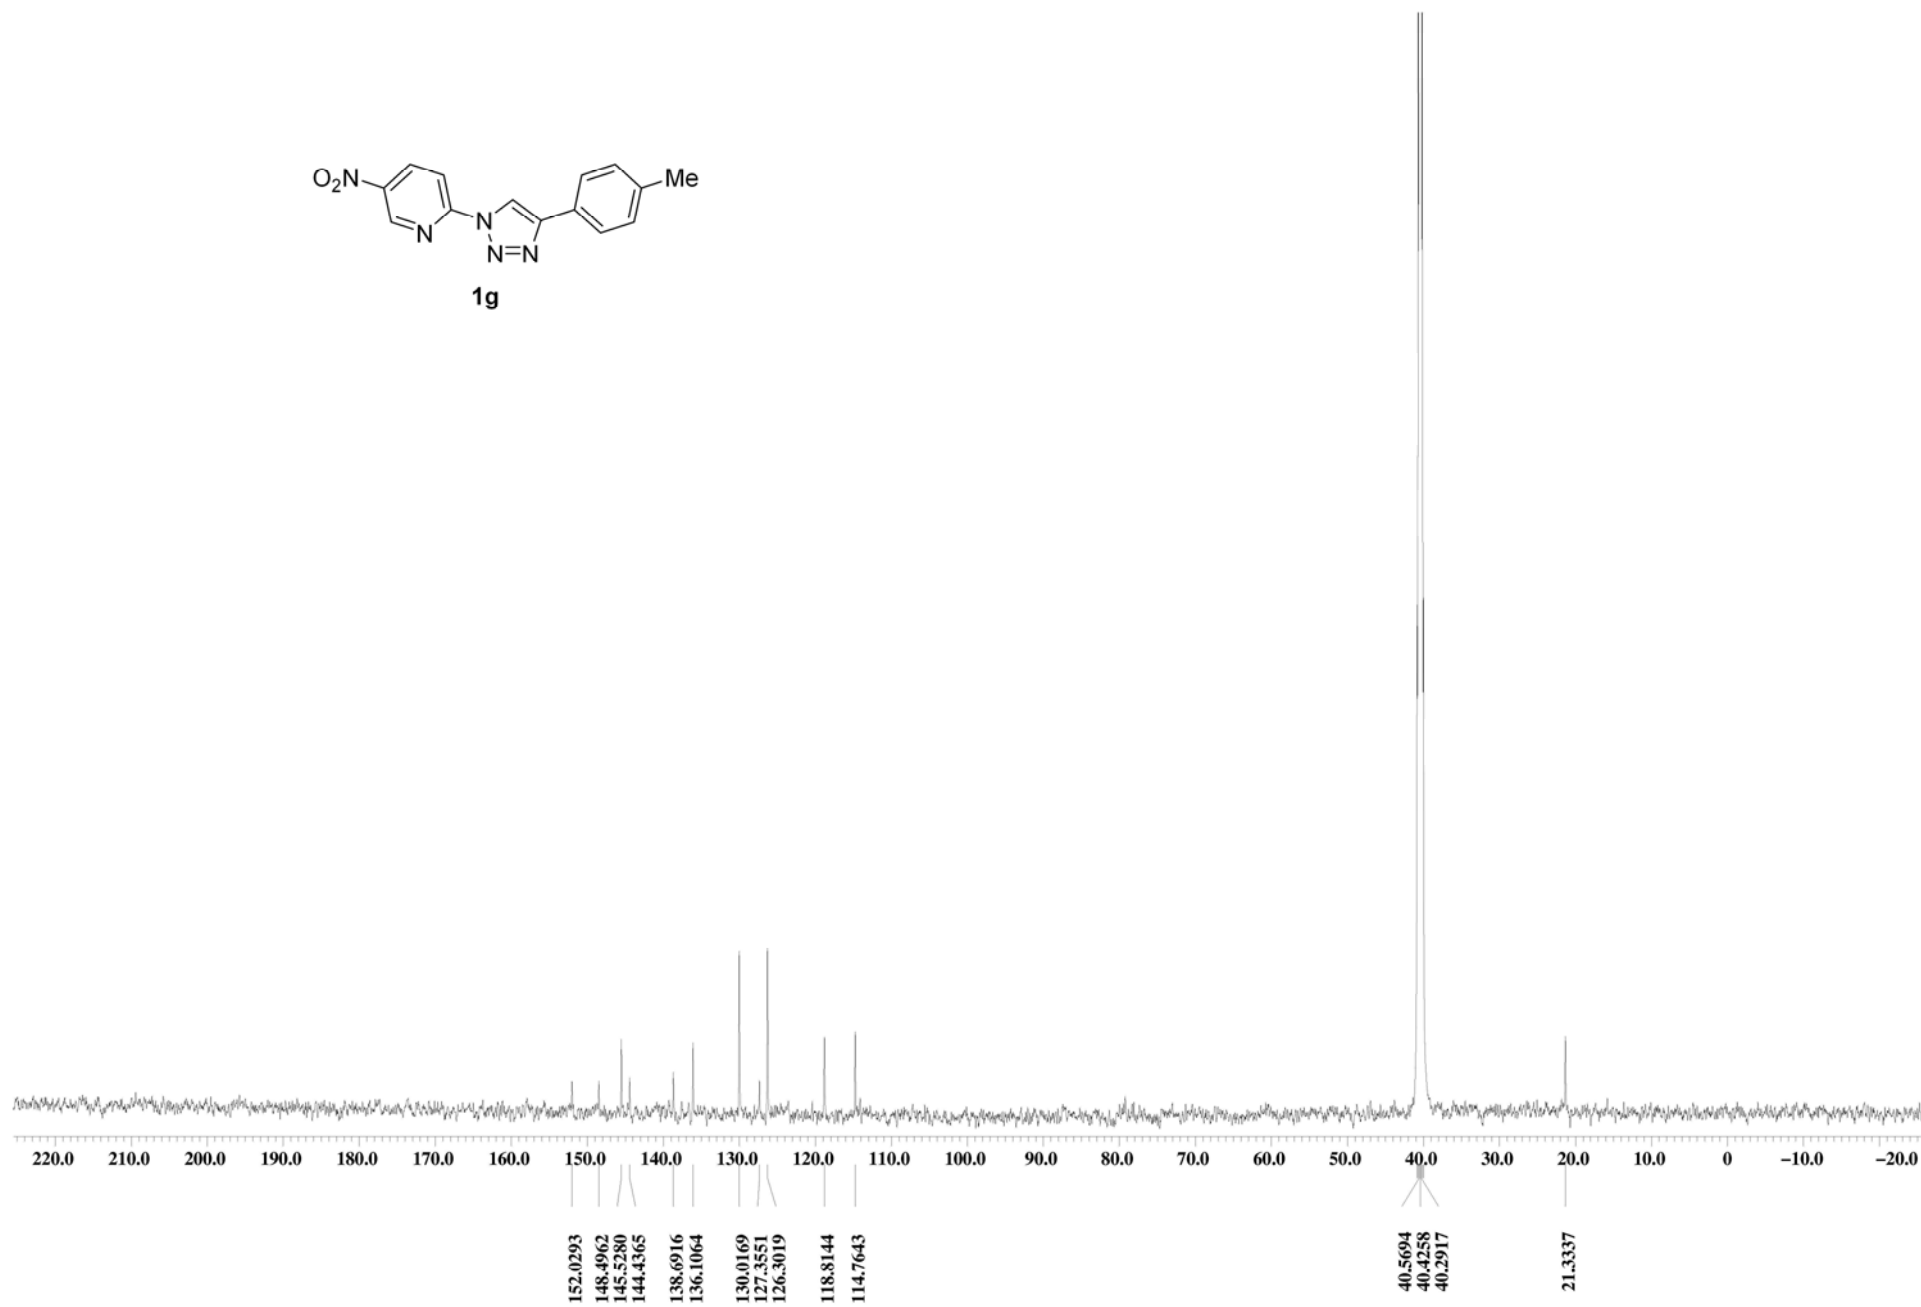



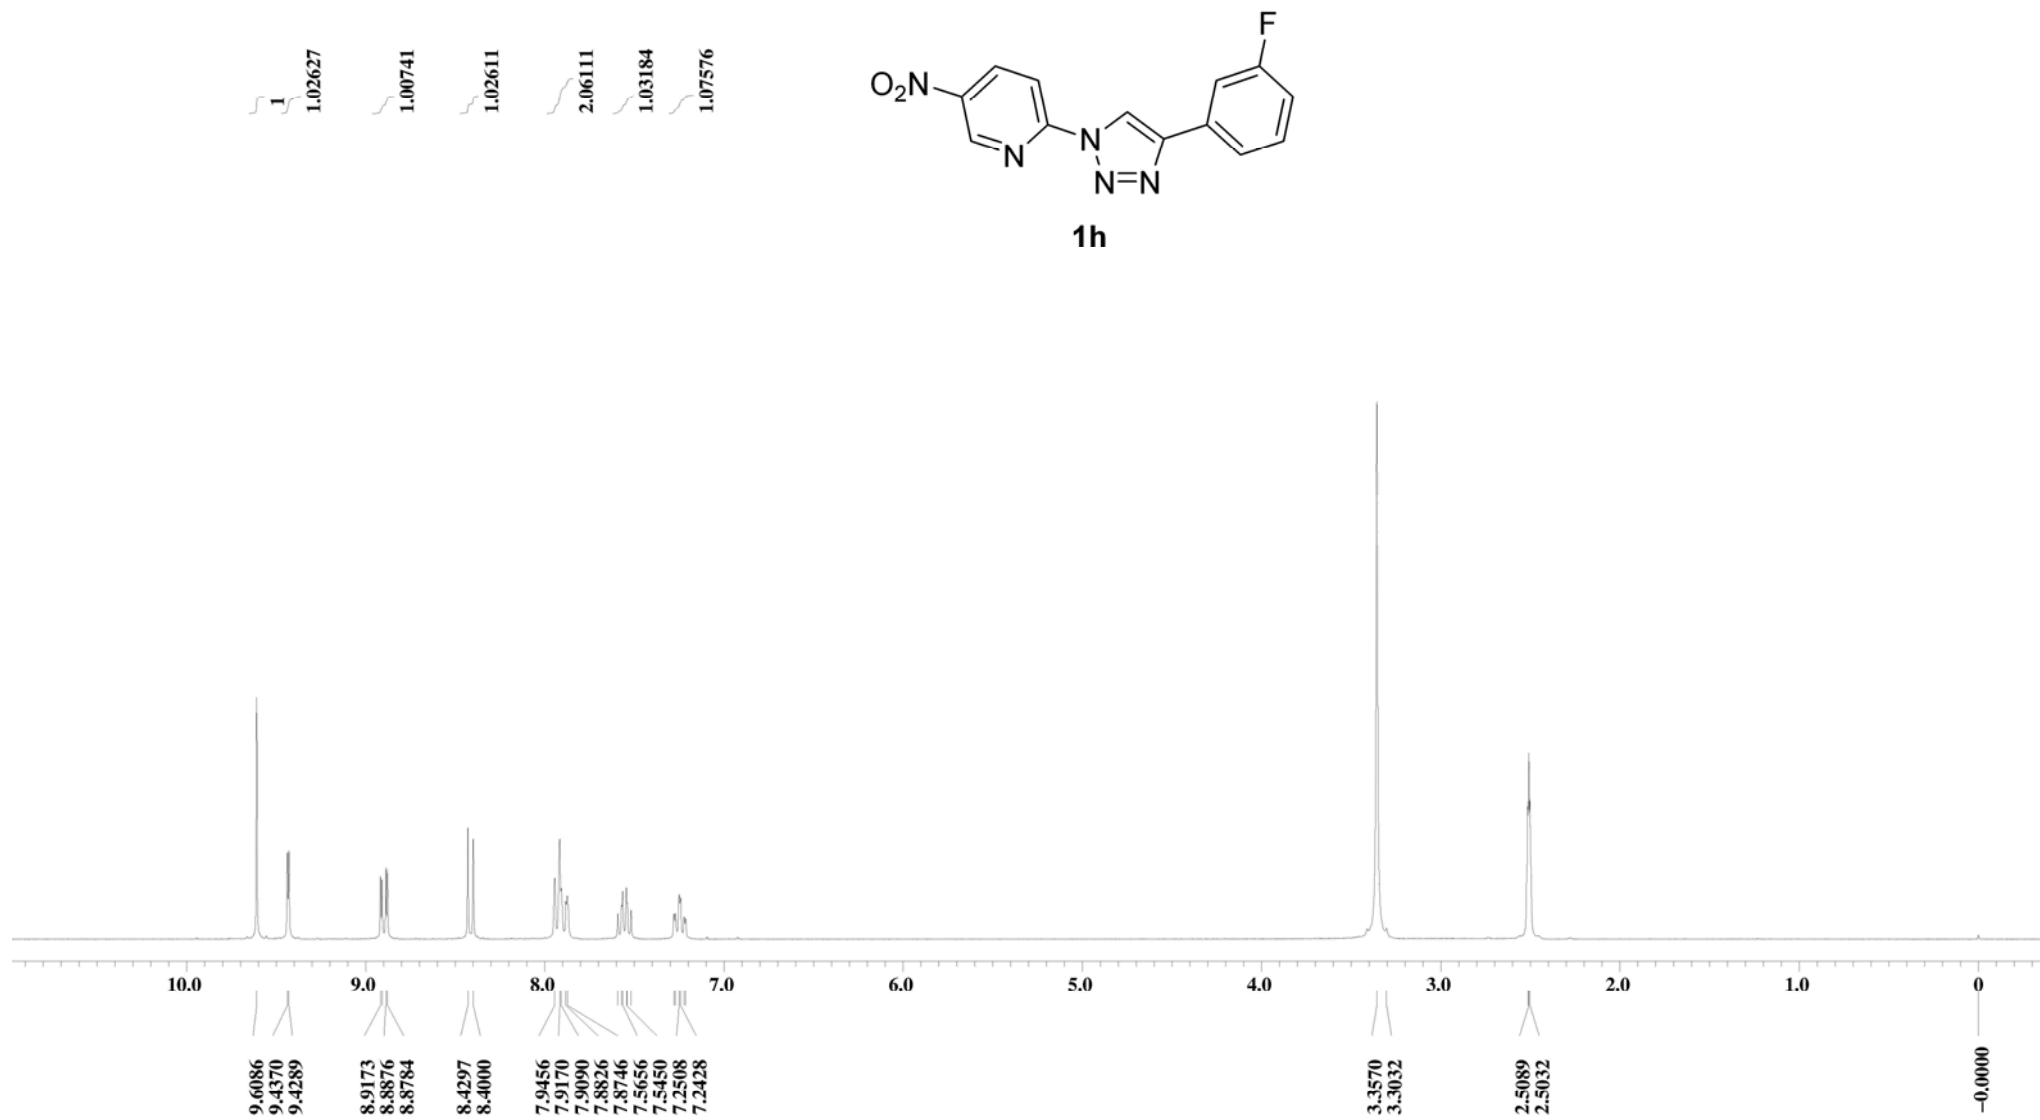

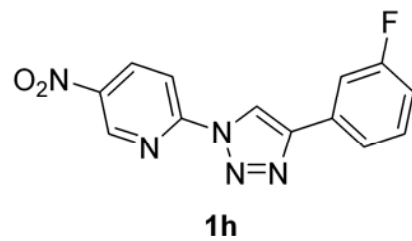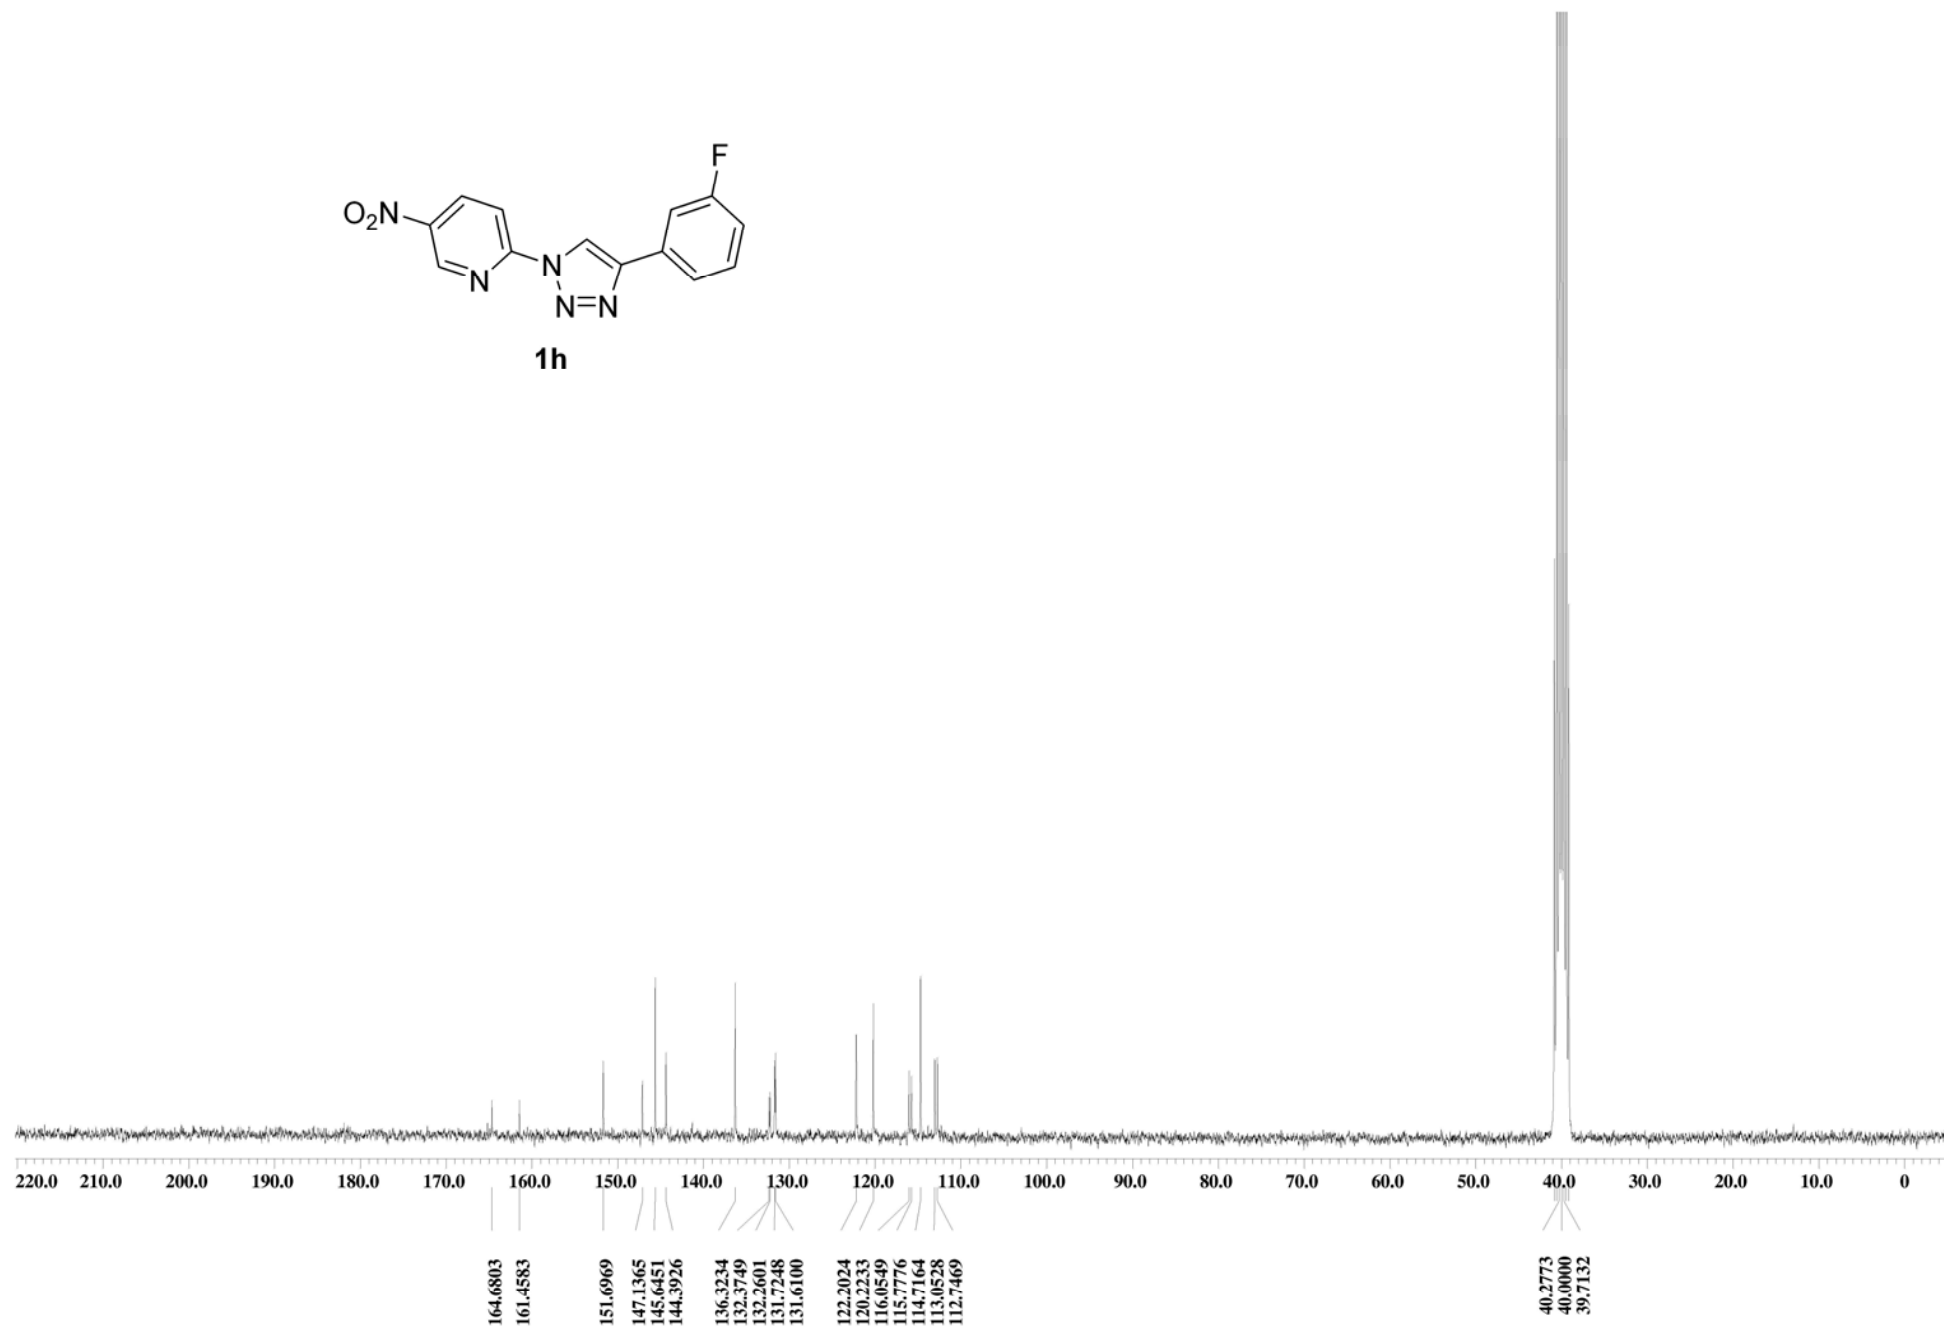

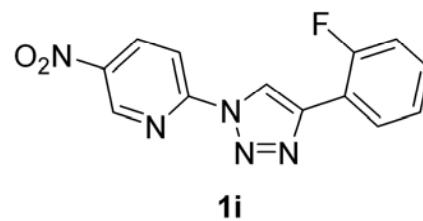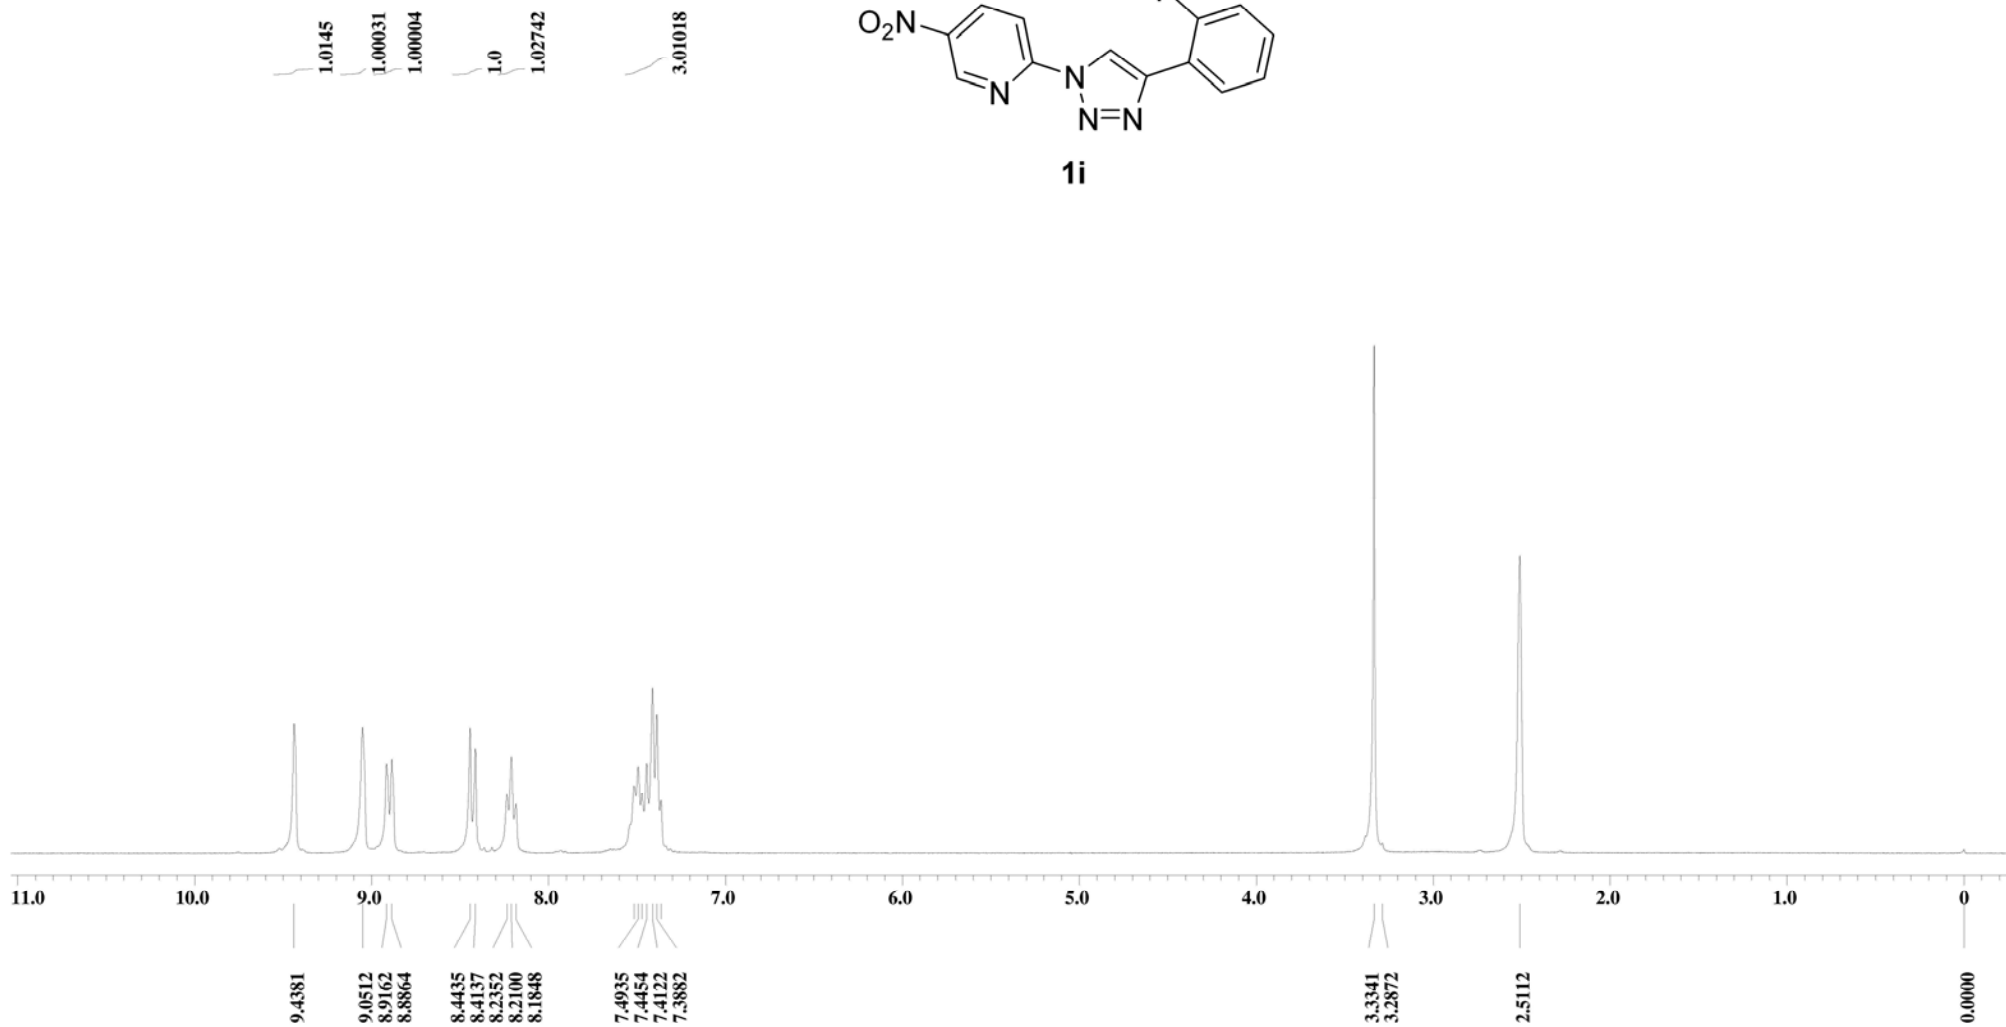

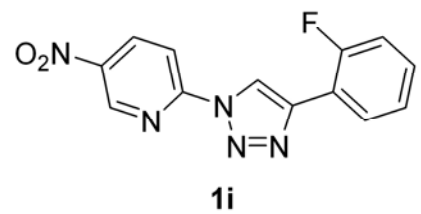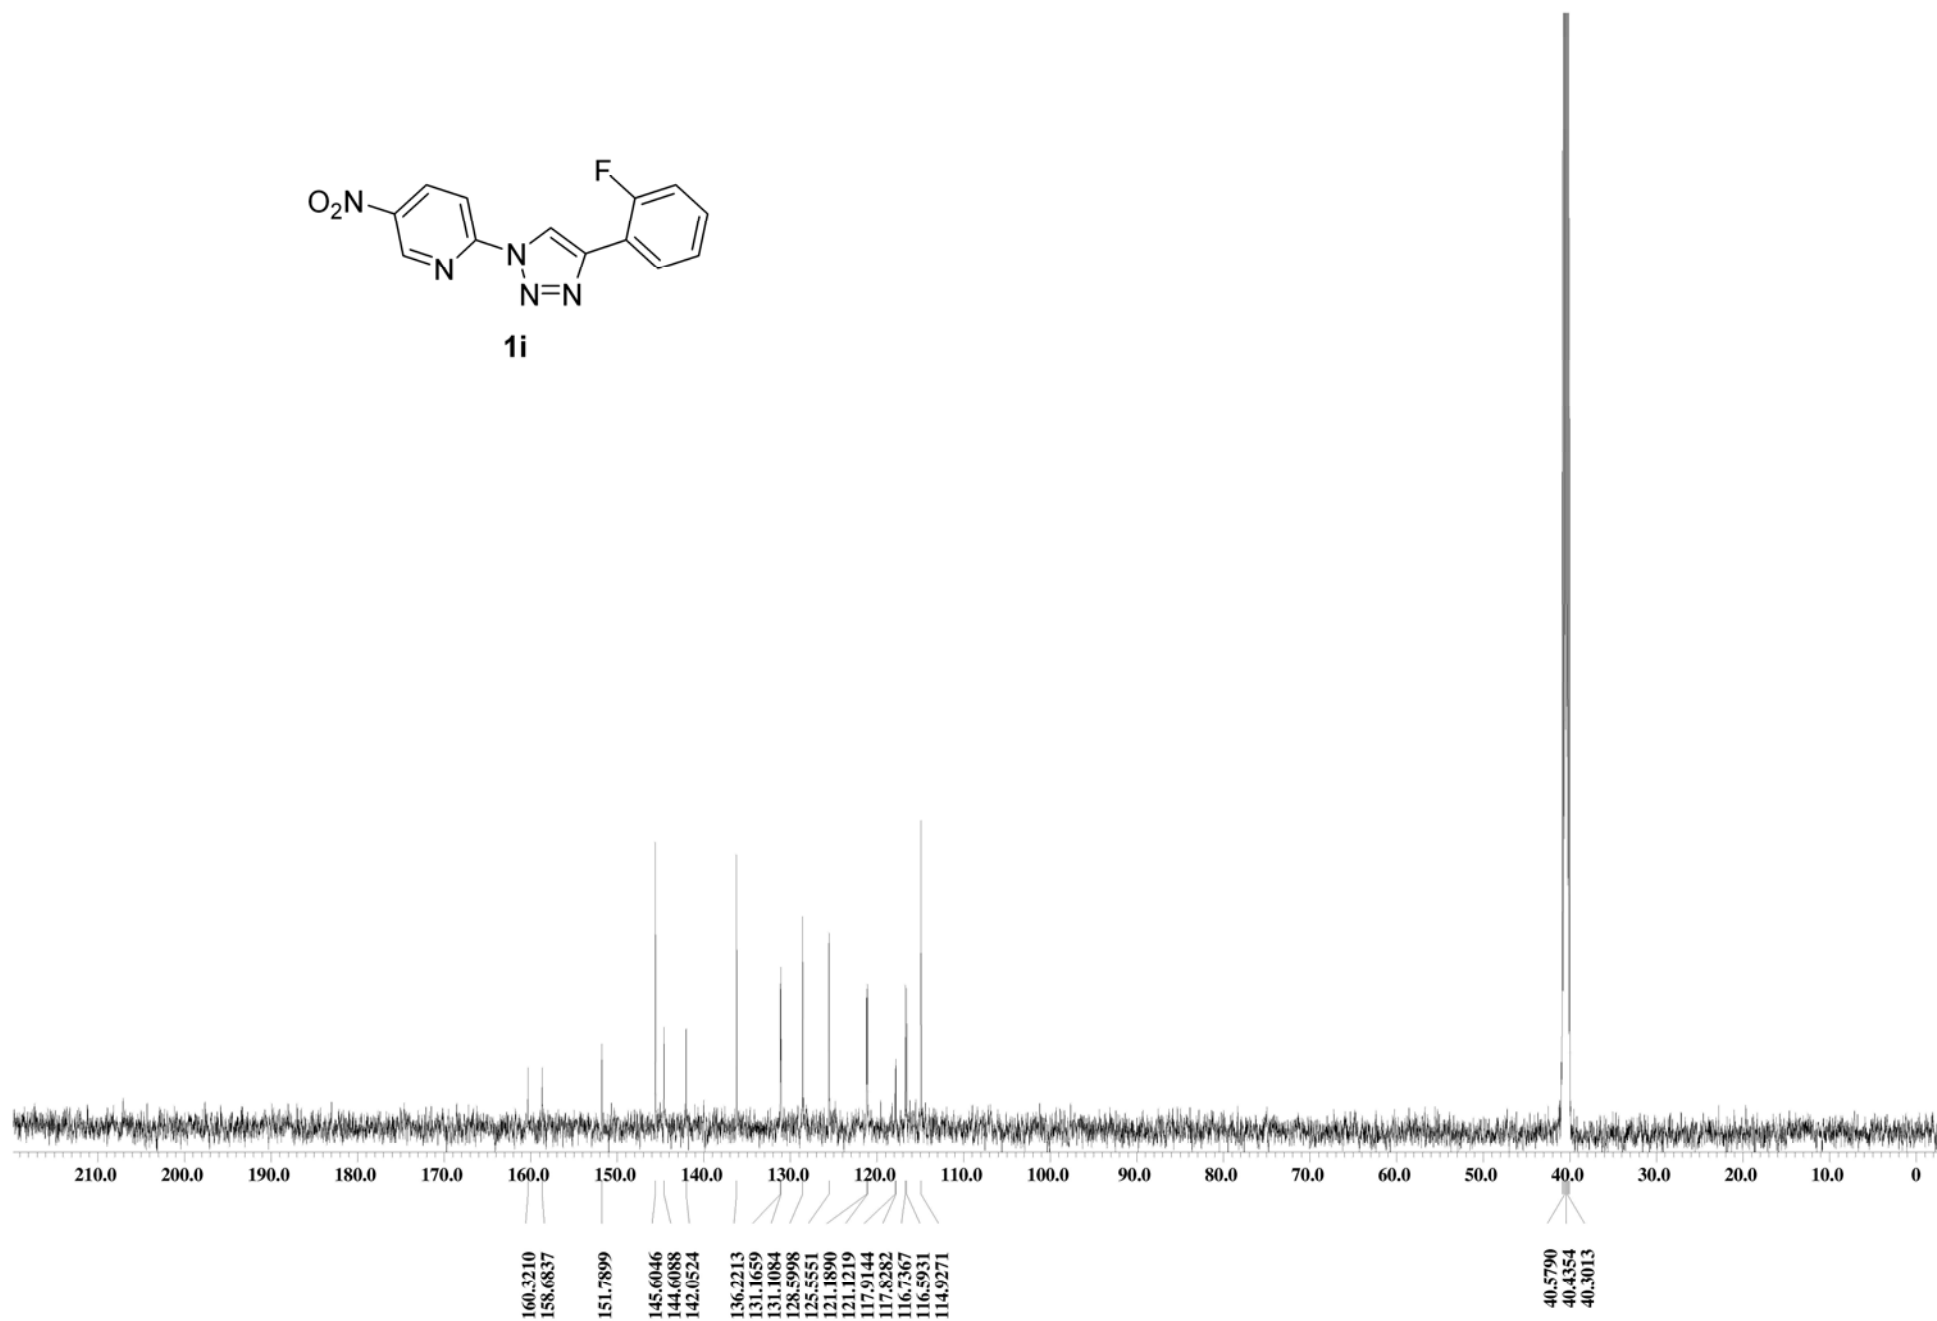

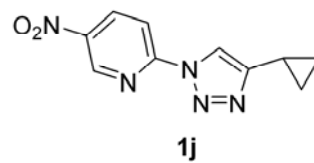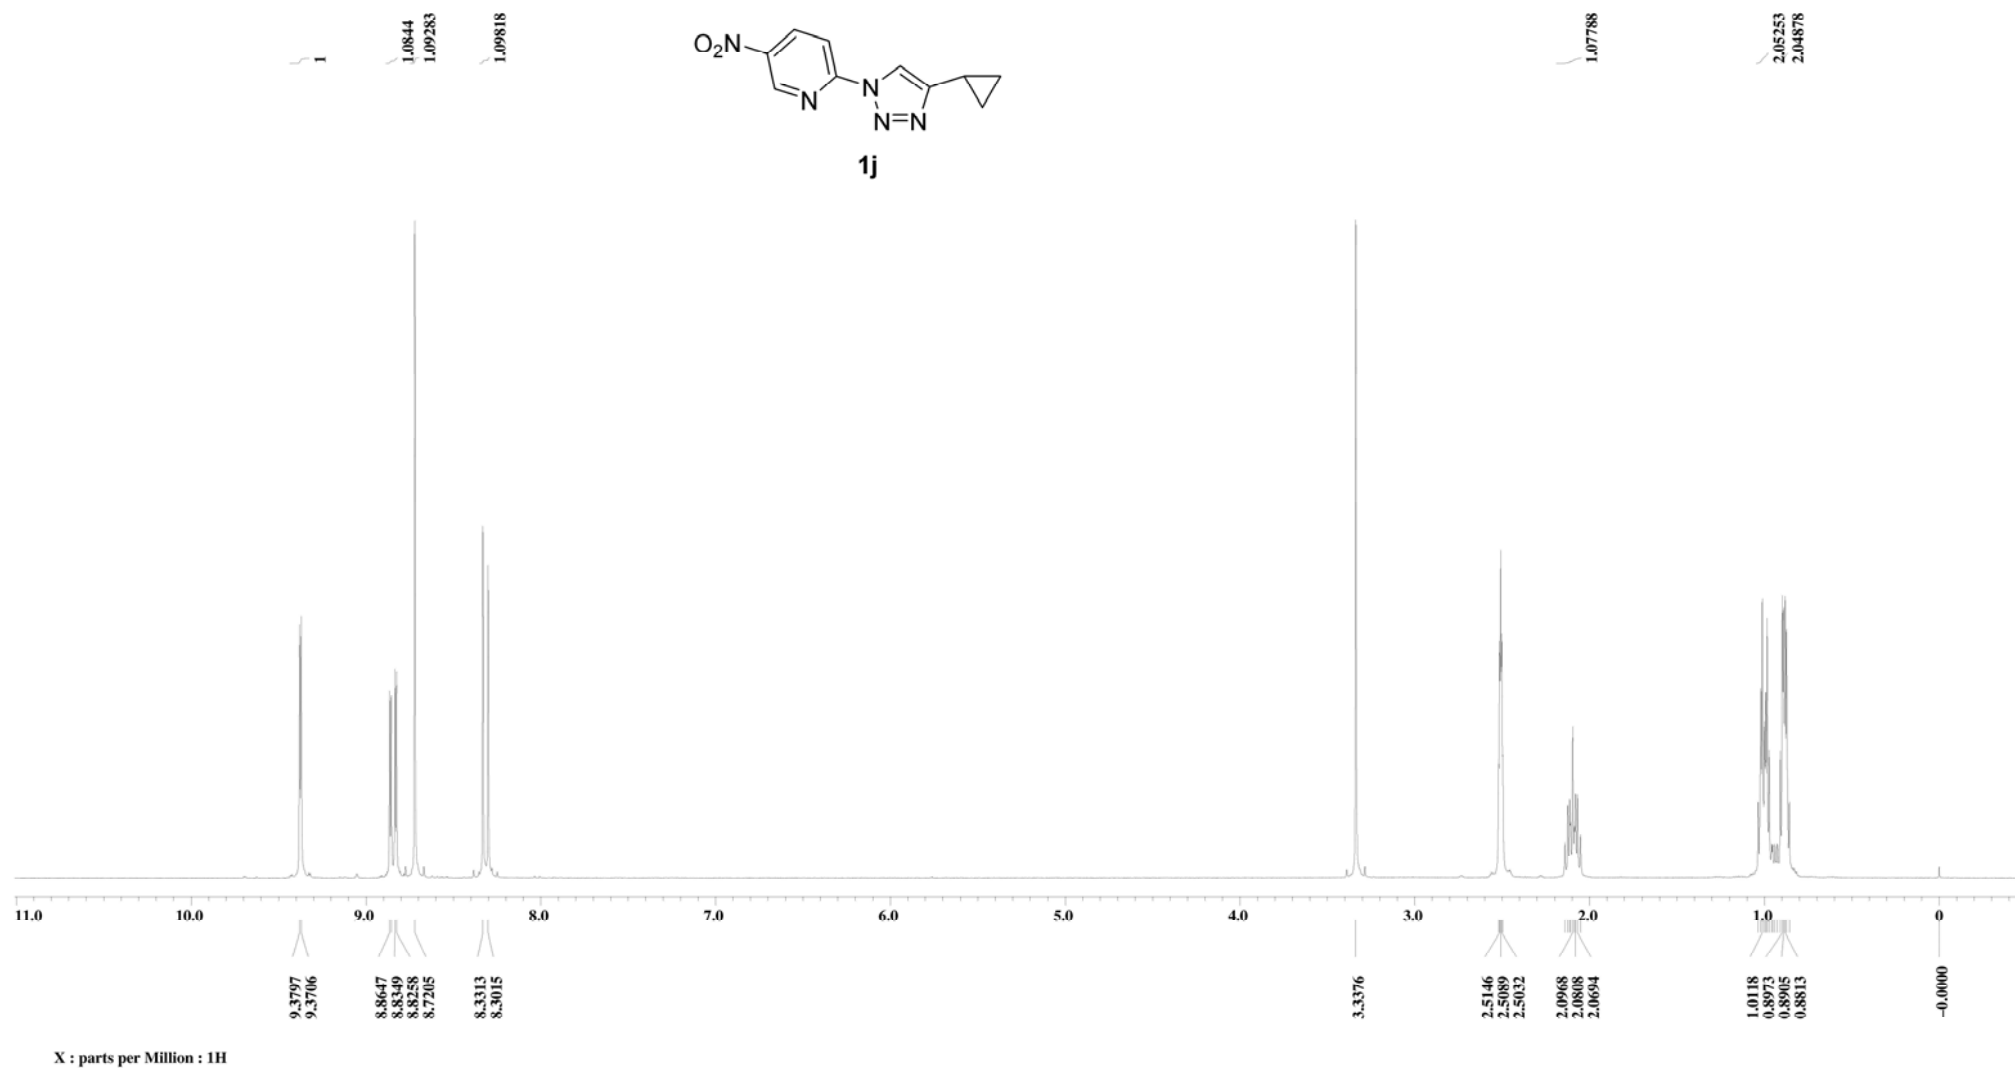

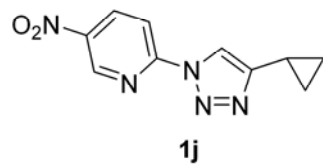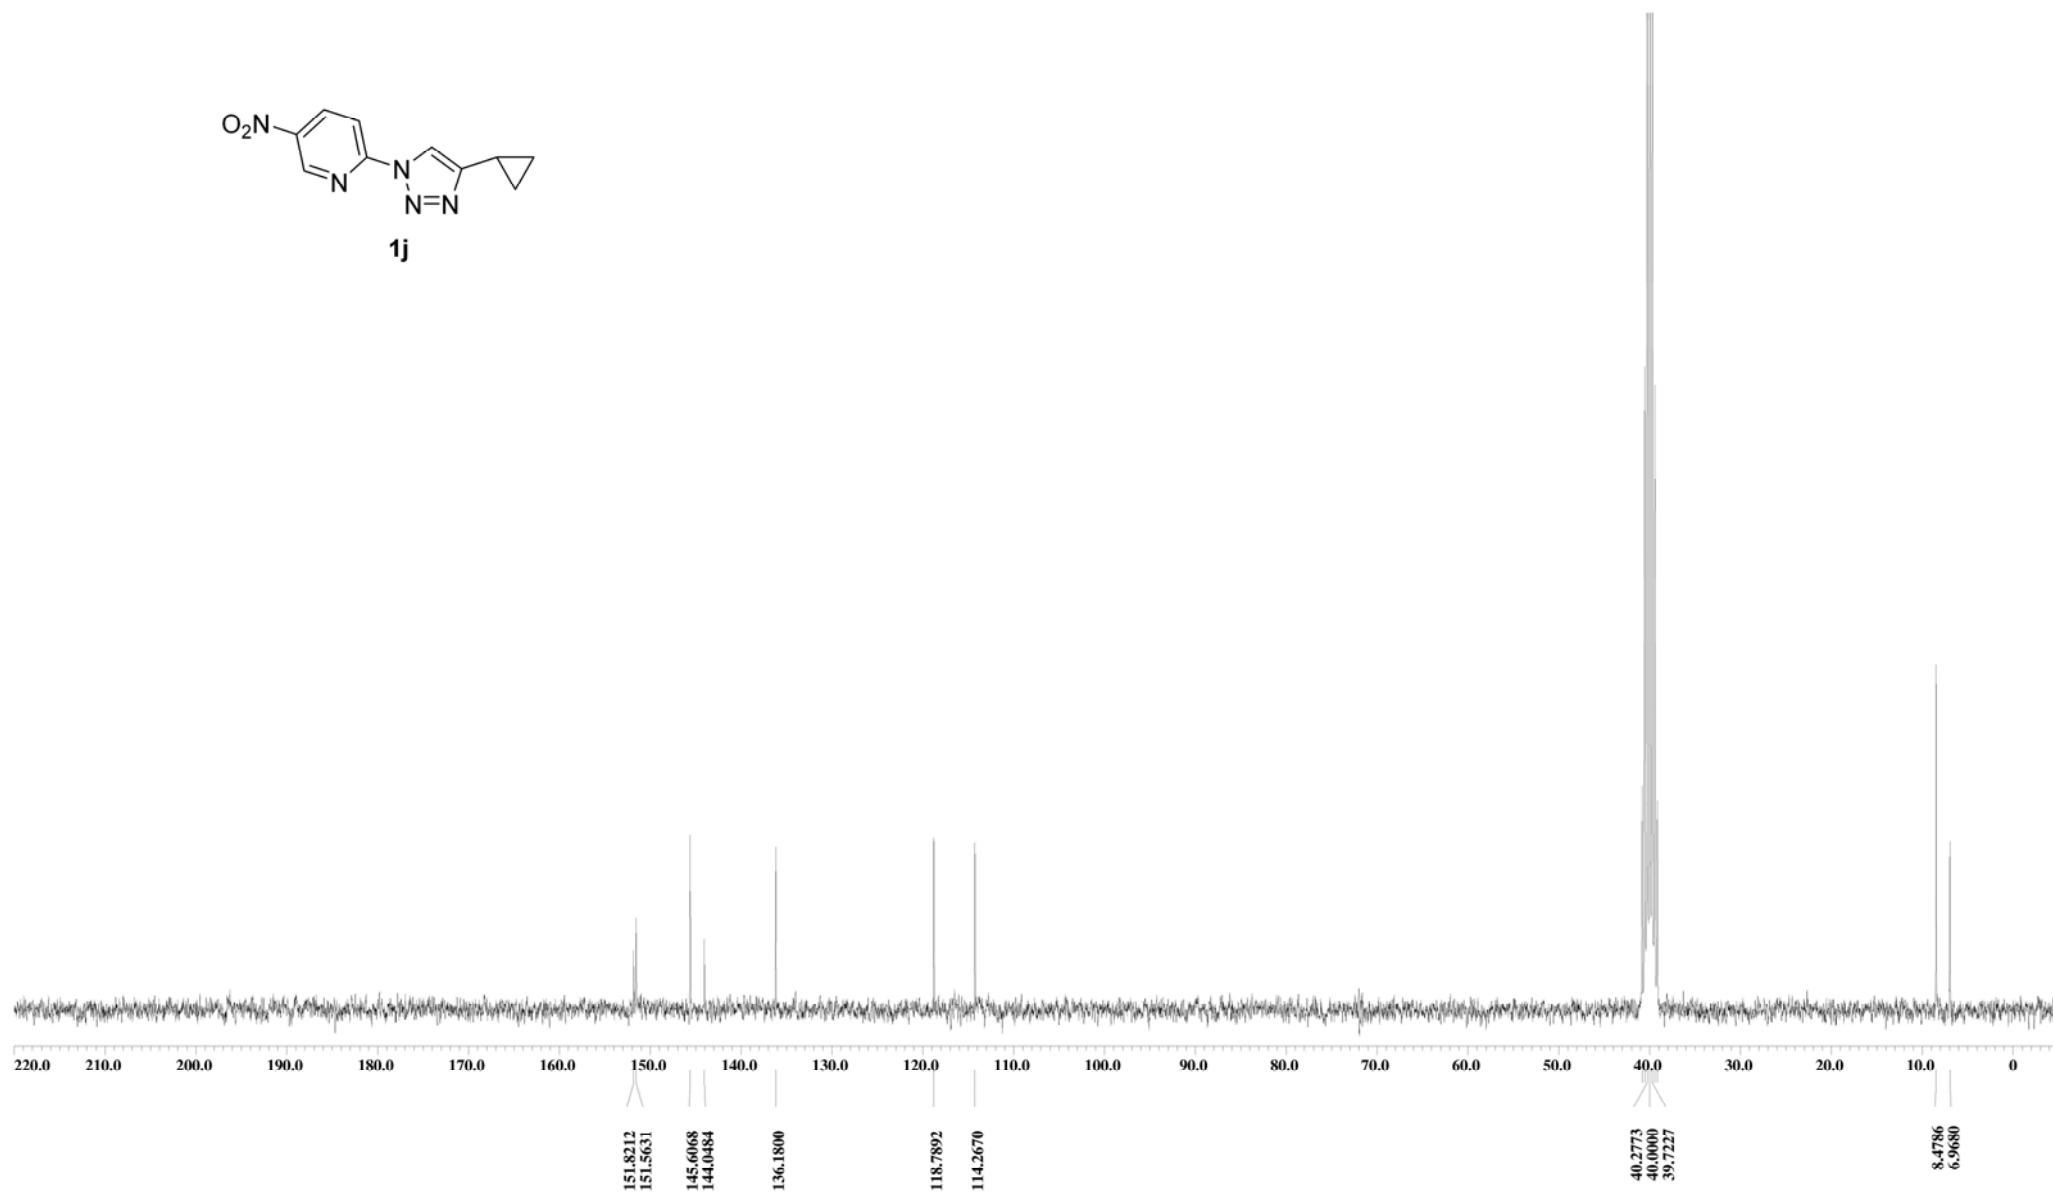

X : parts per Million : 13C

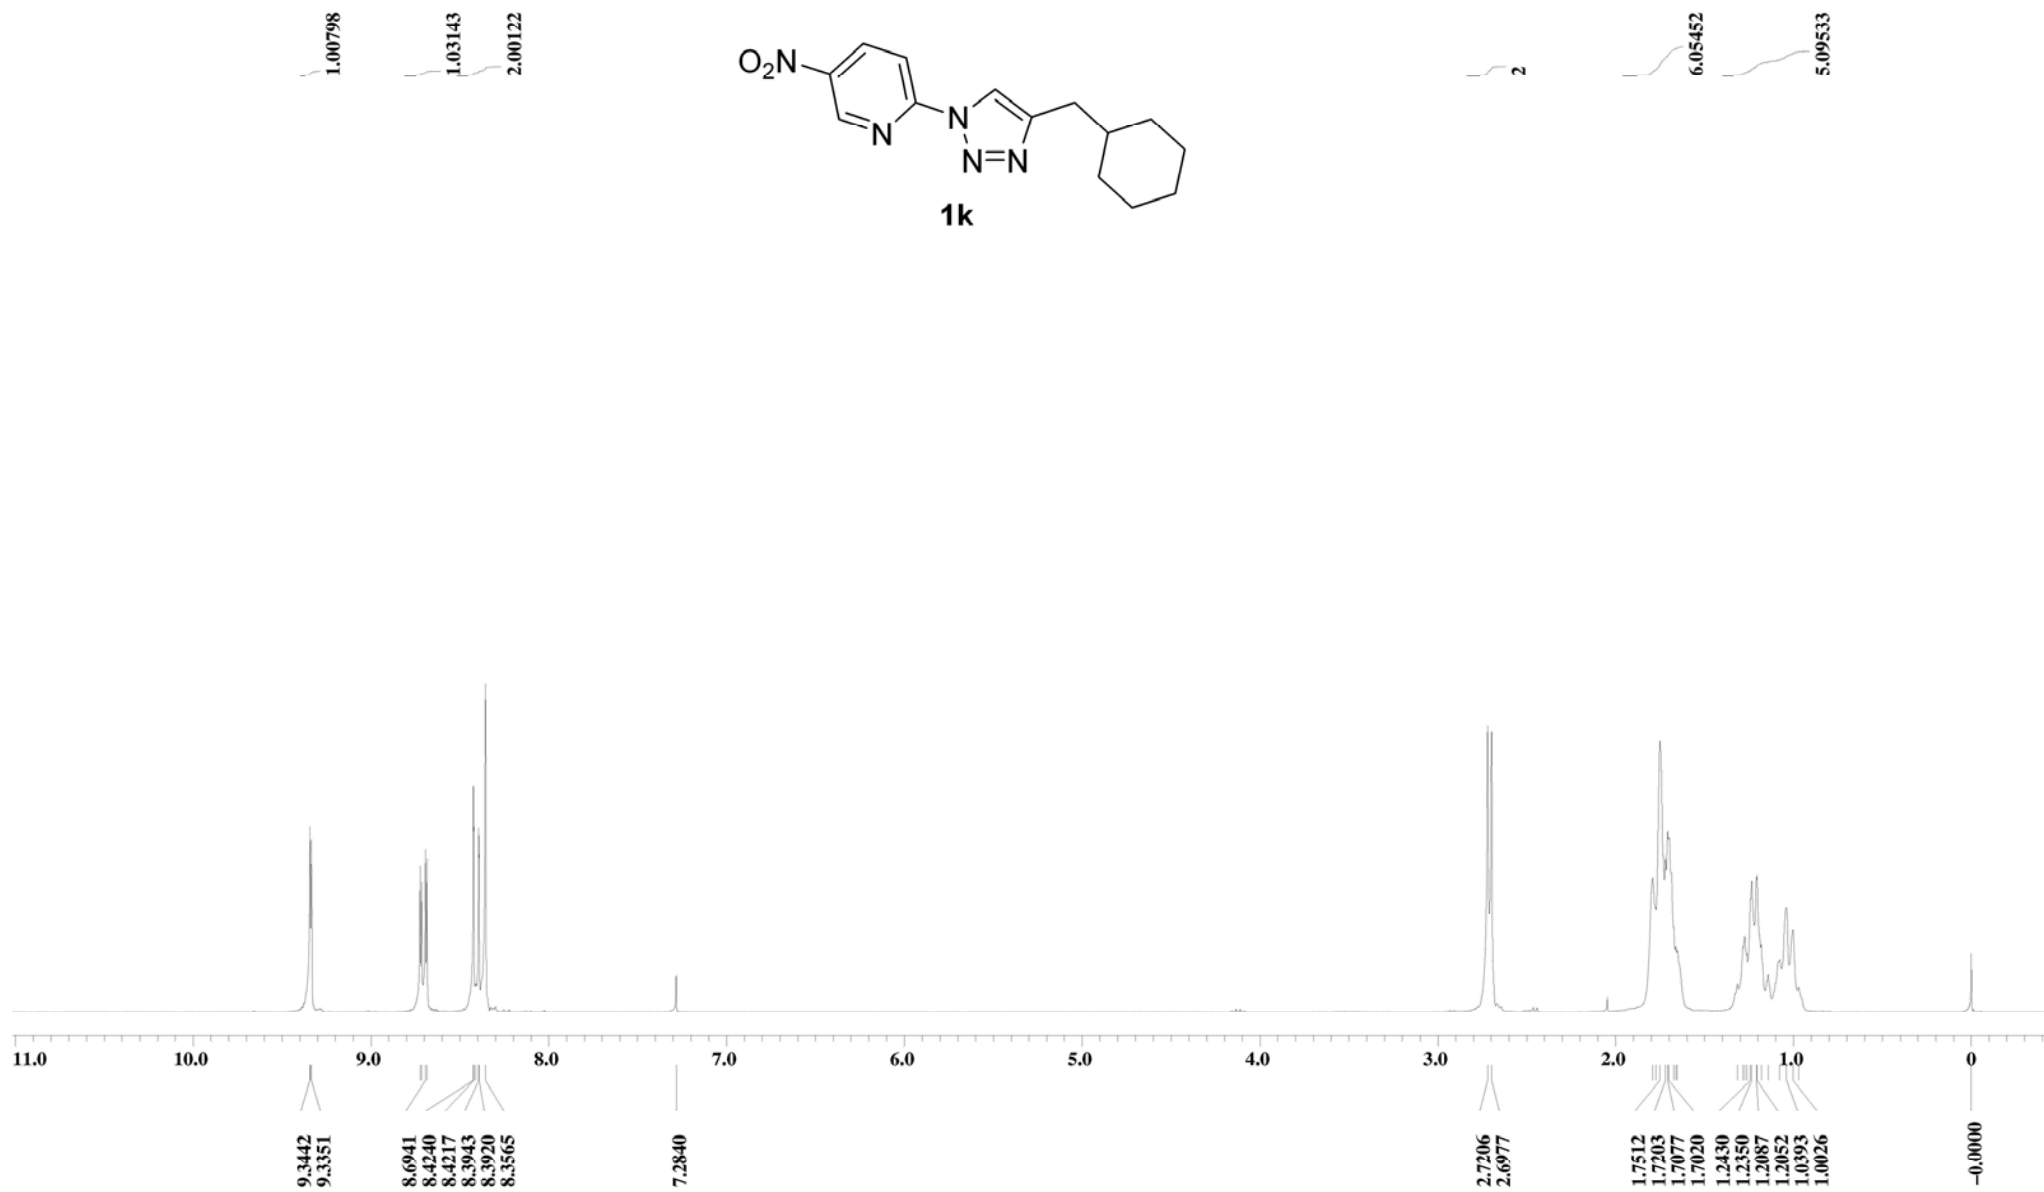

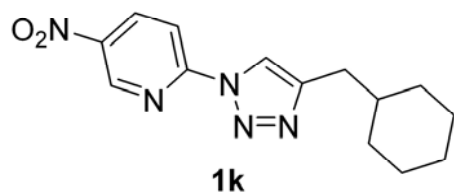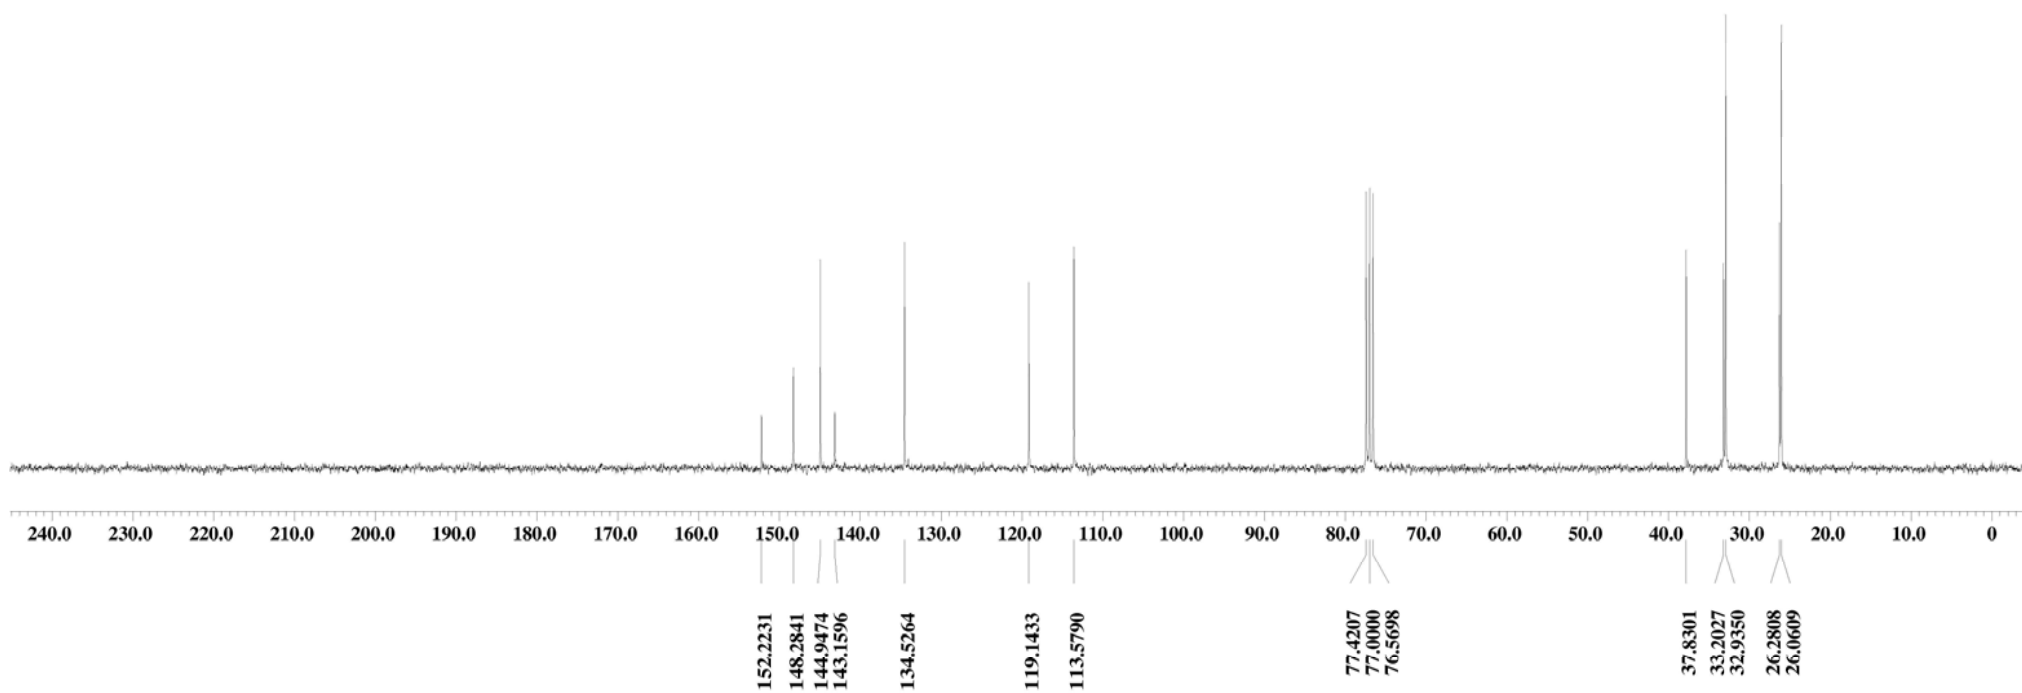



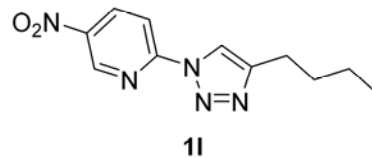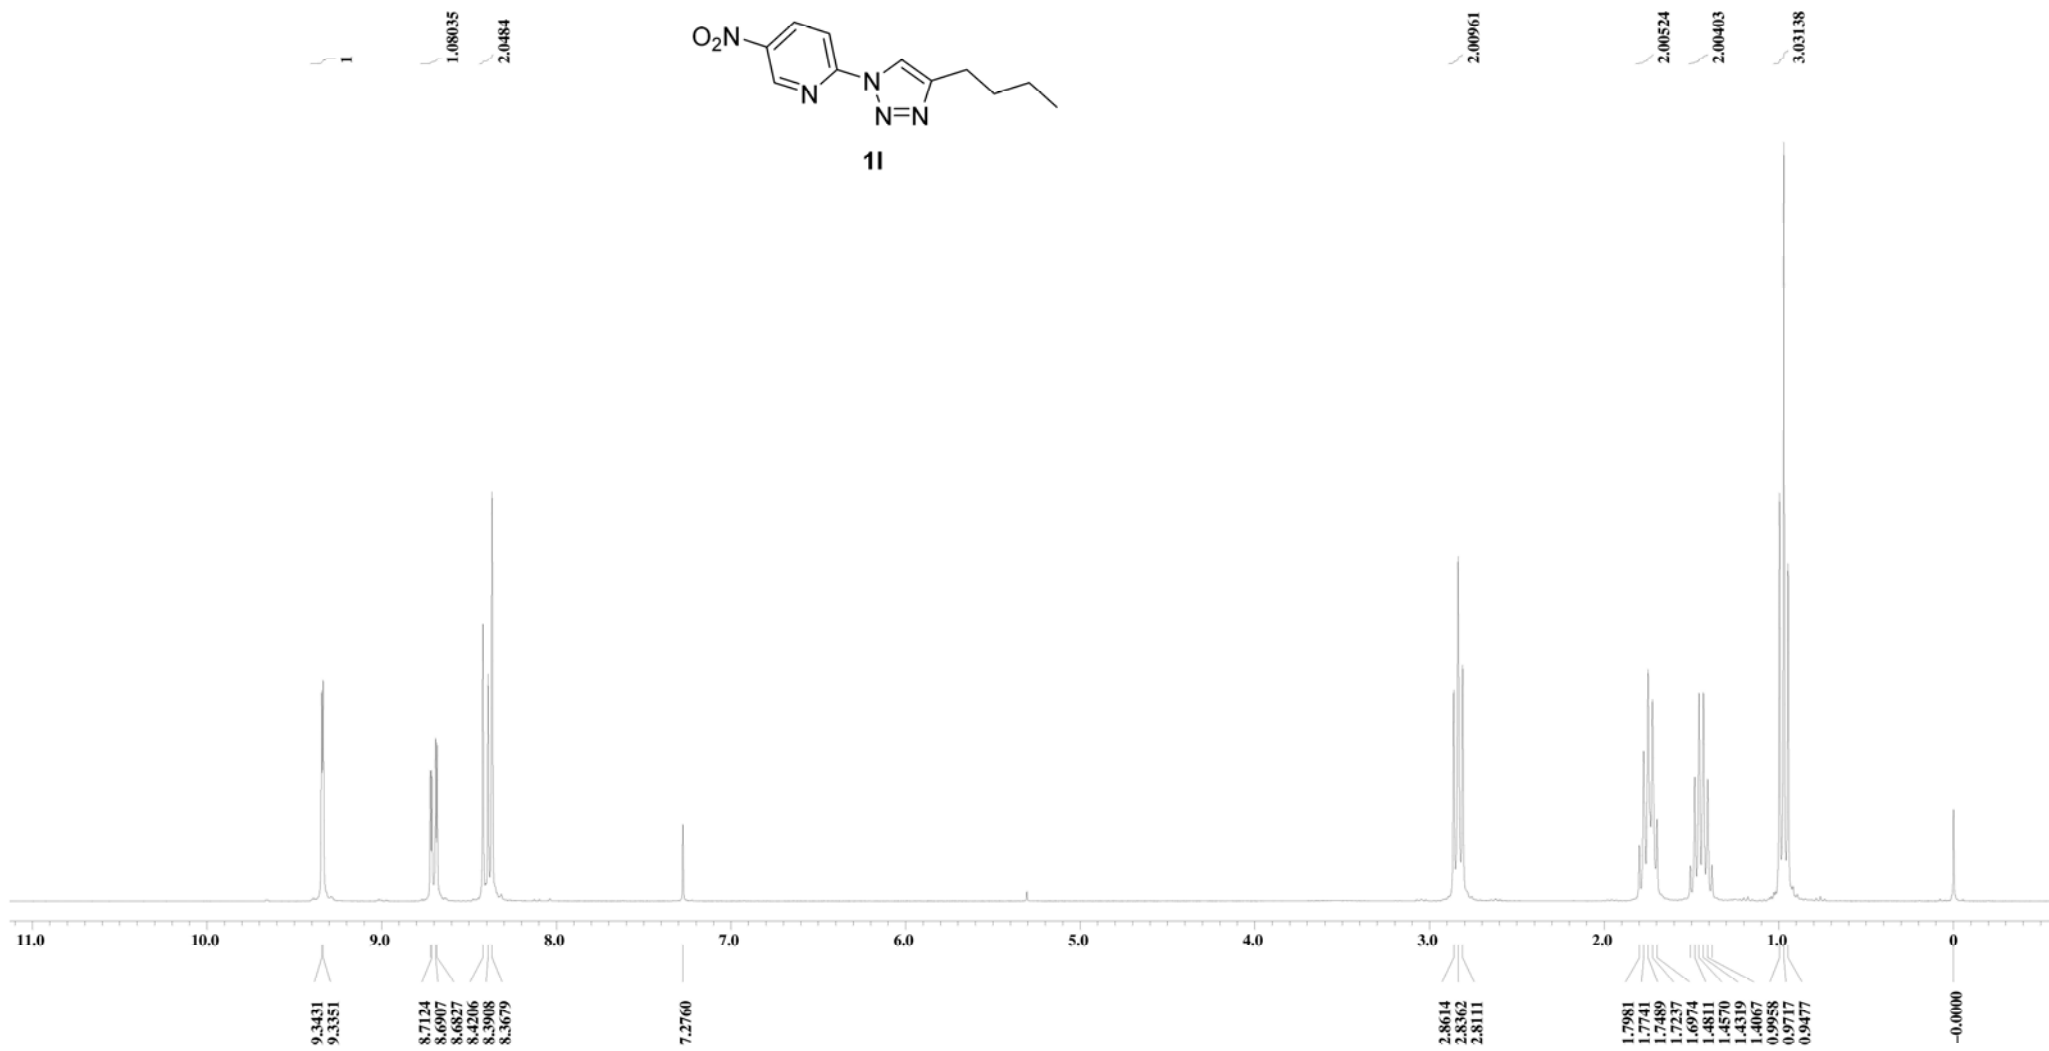

X : parts per Million : 1H

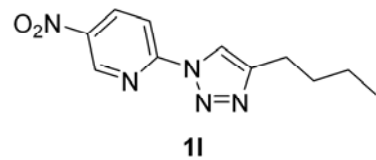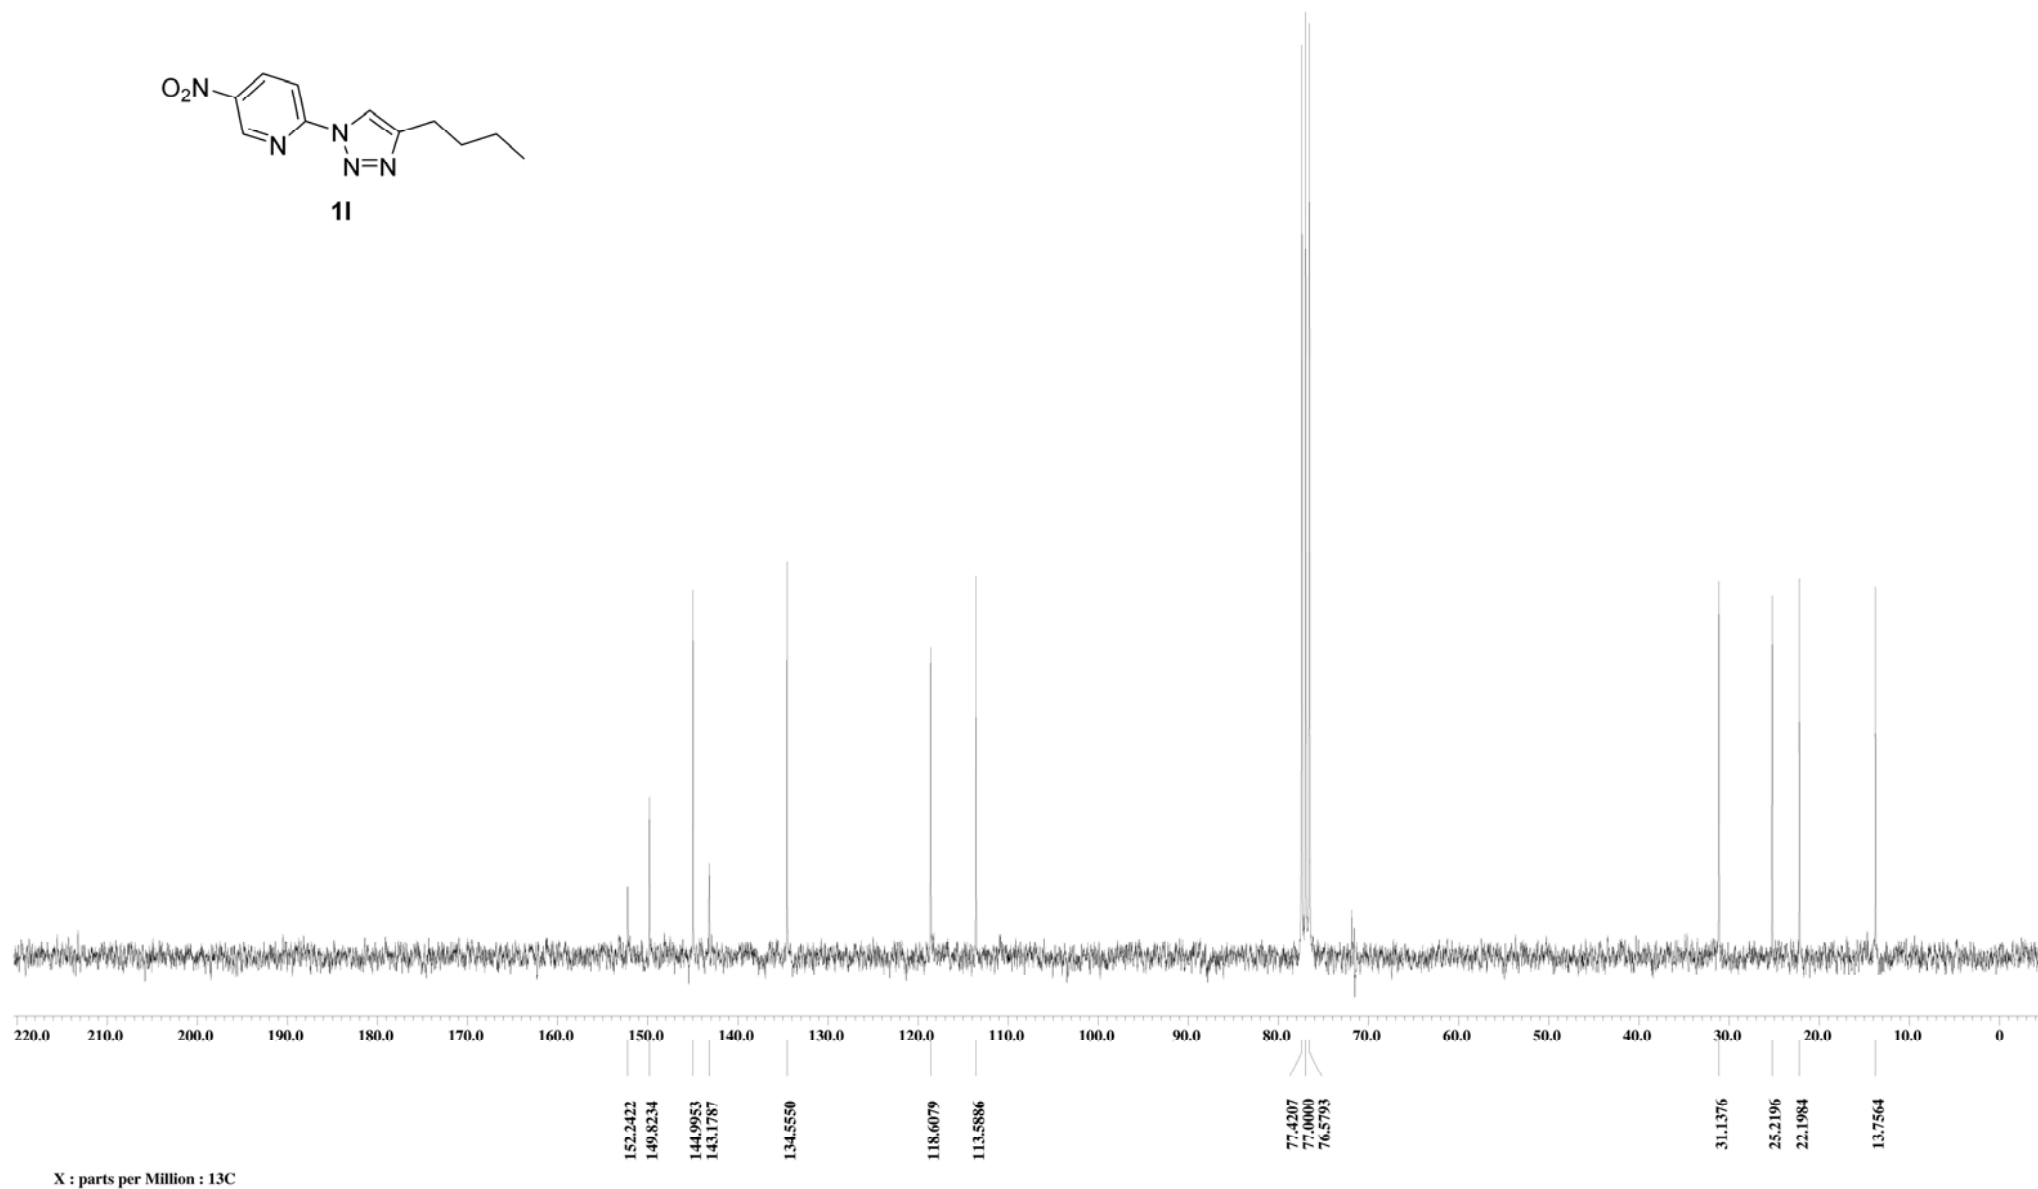

X : parts per Million : <sup>13</sup>C

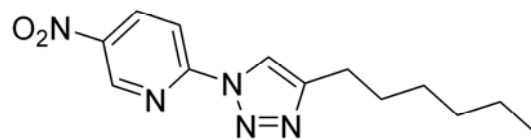

1m

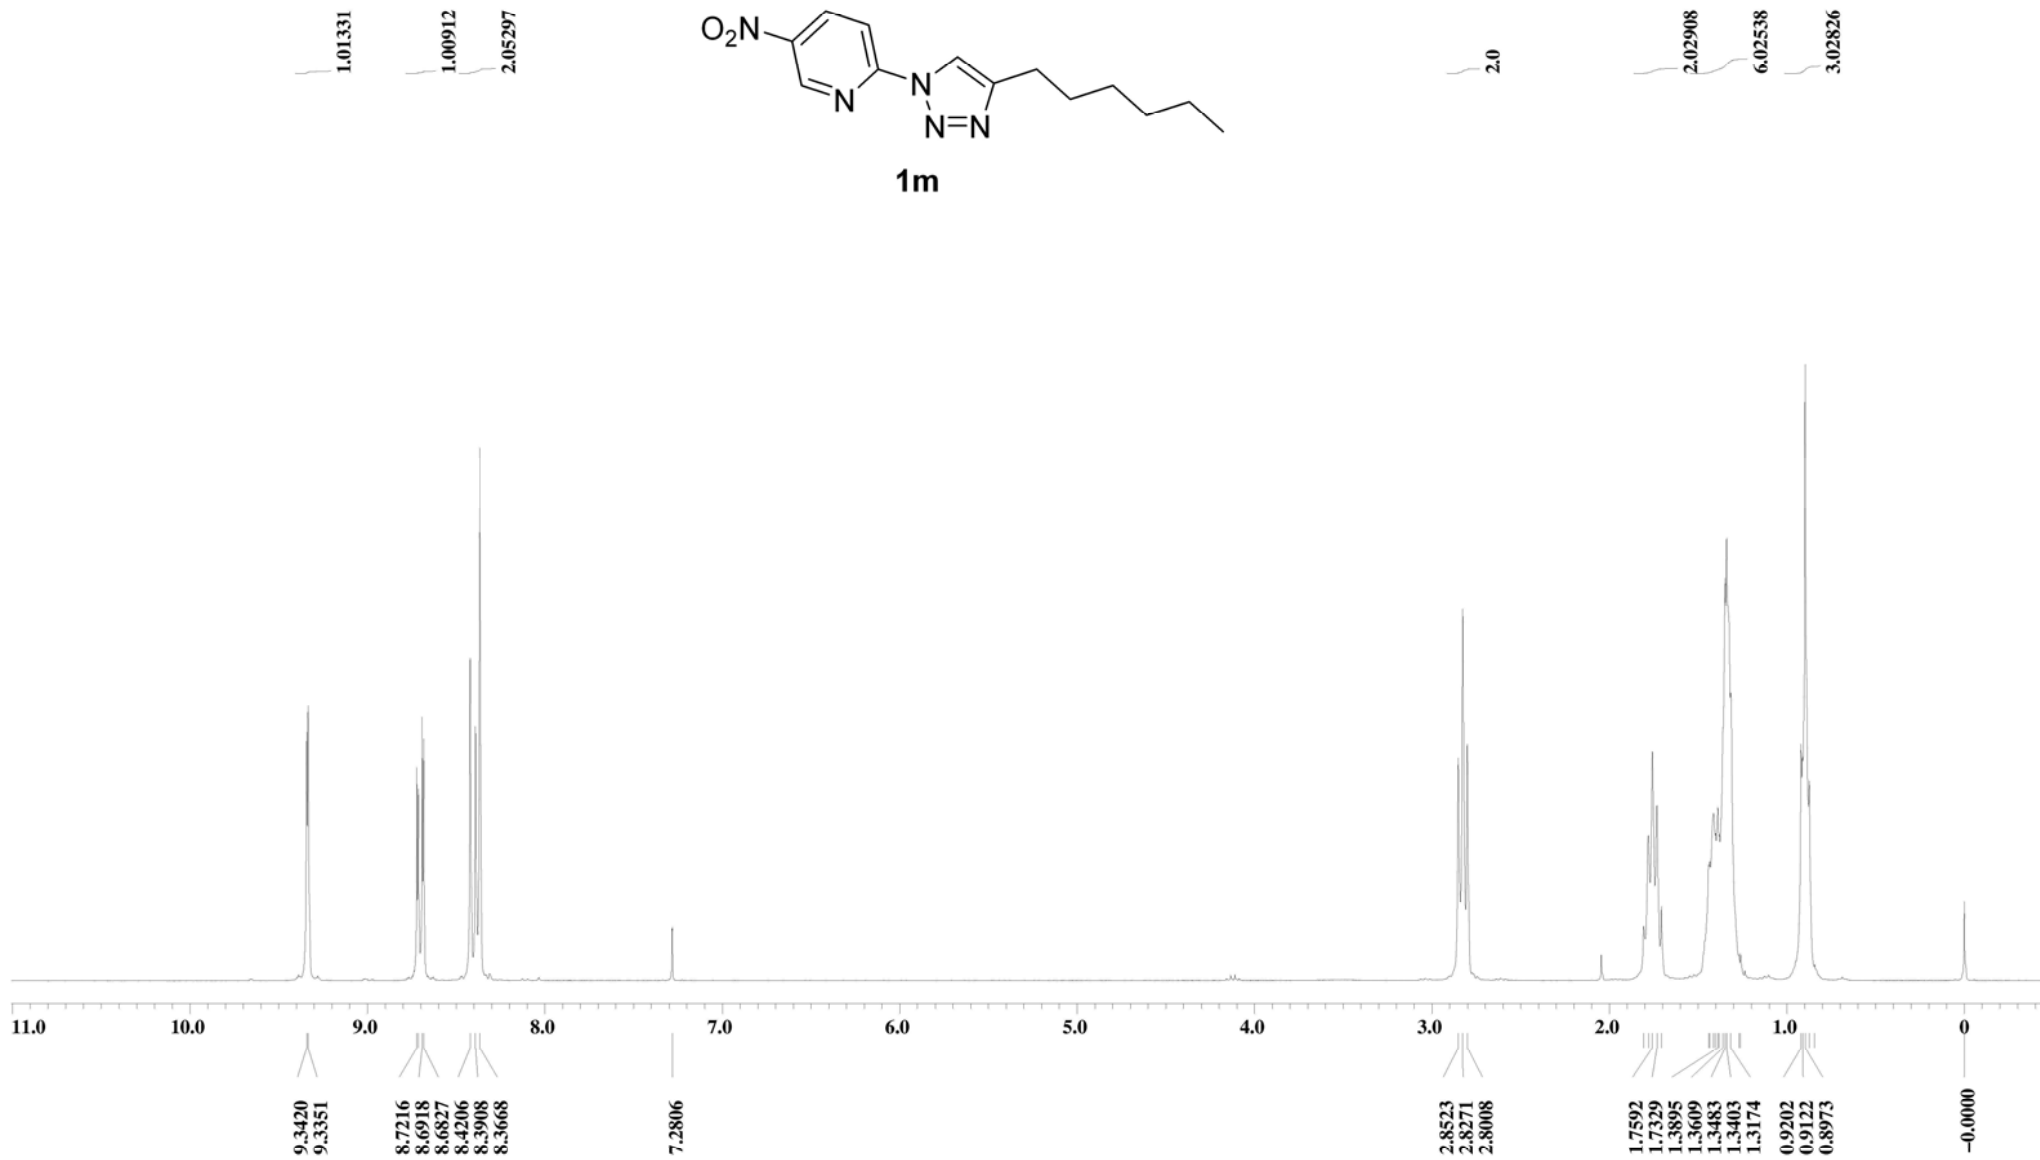

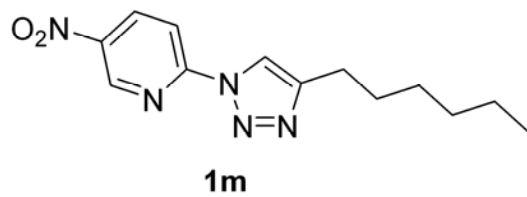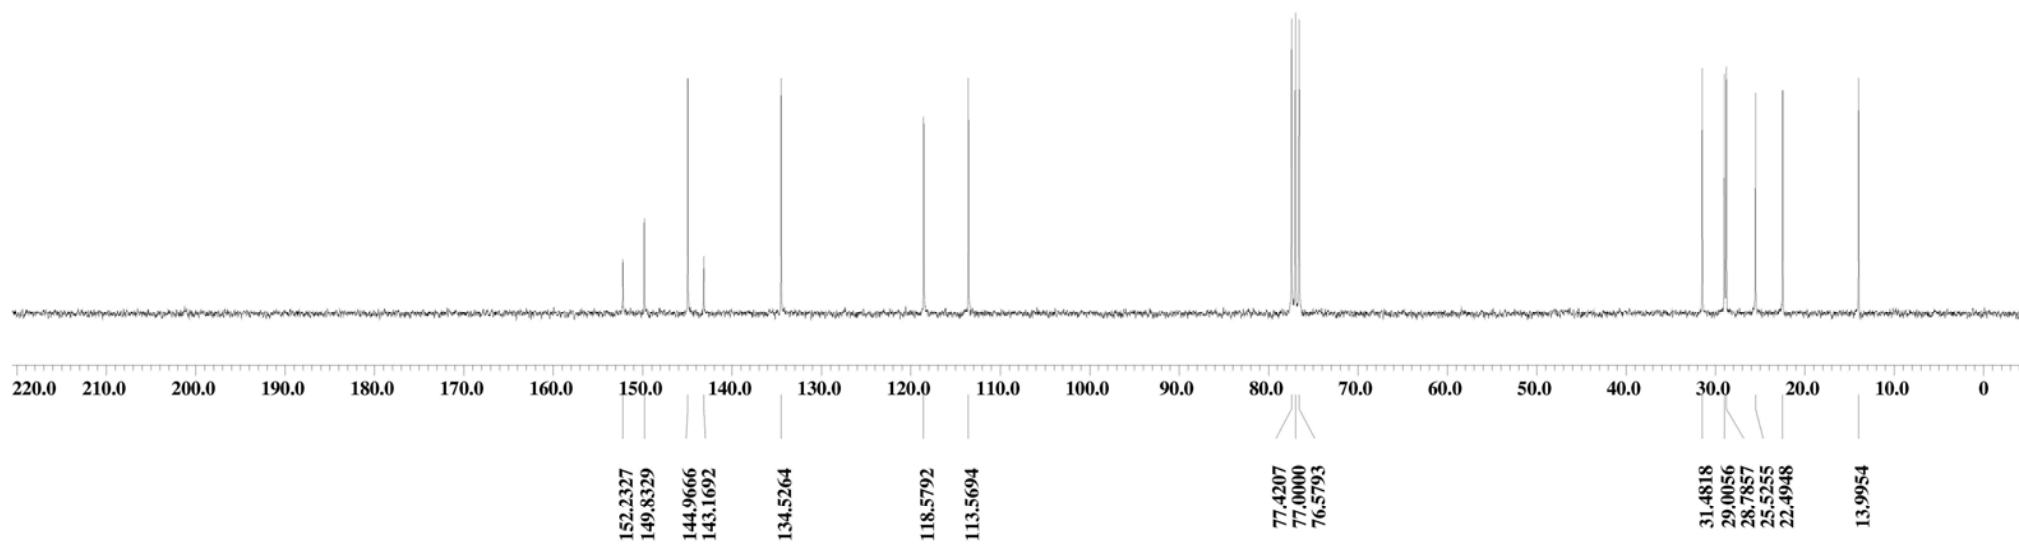

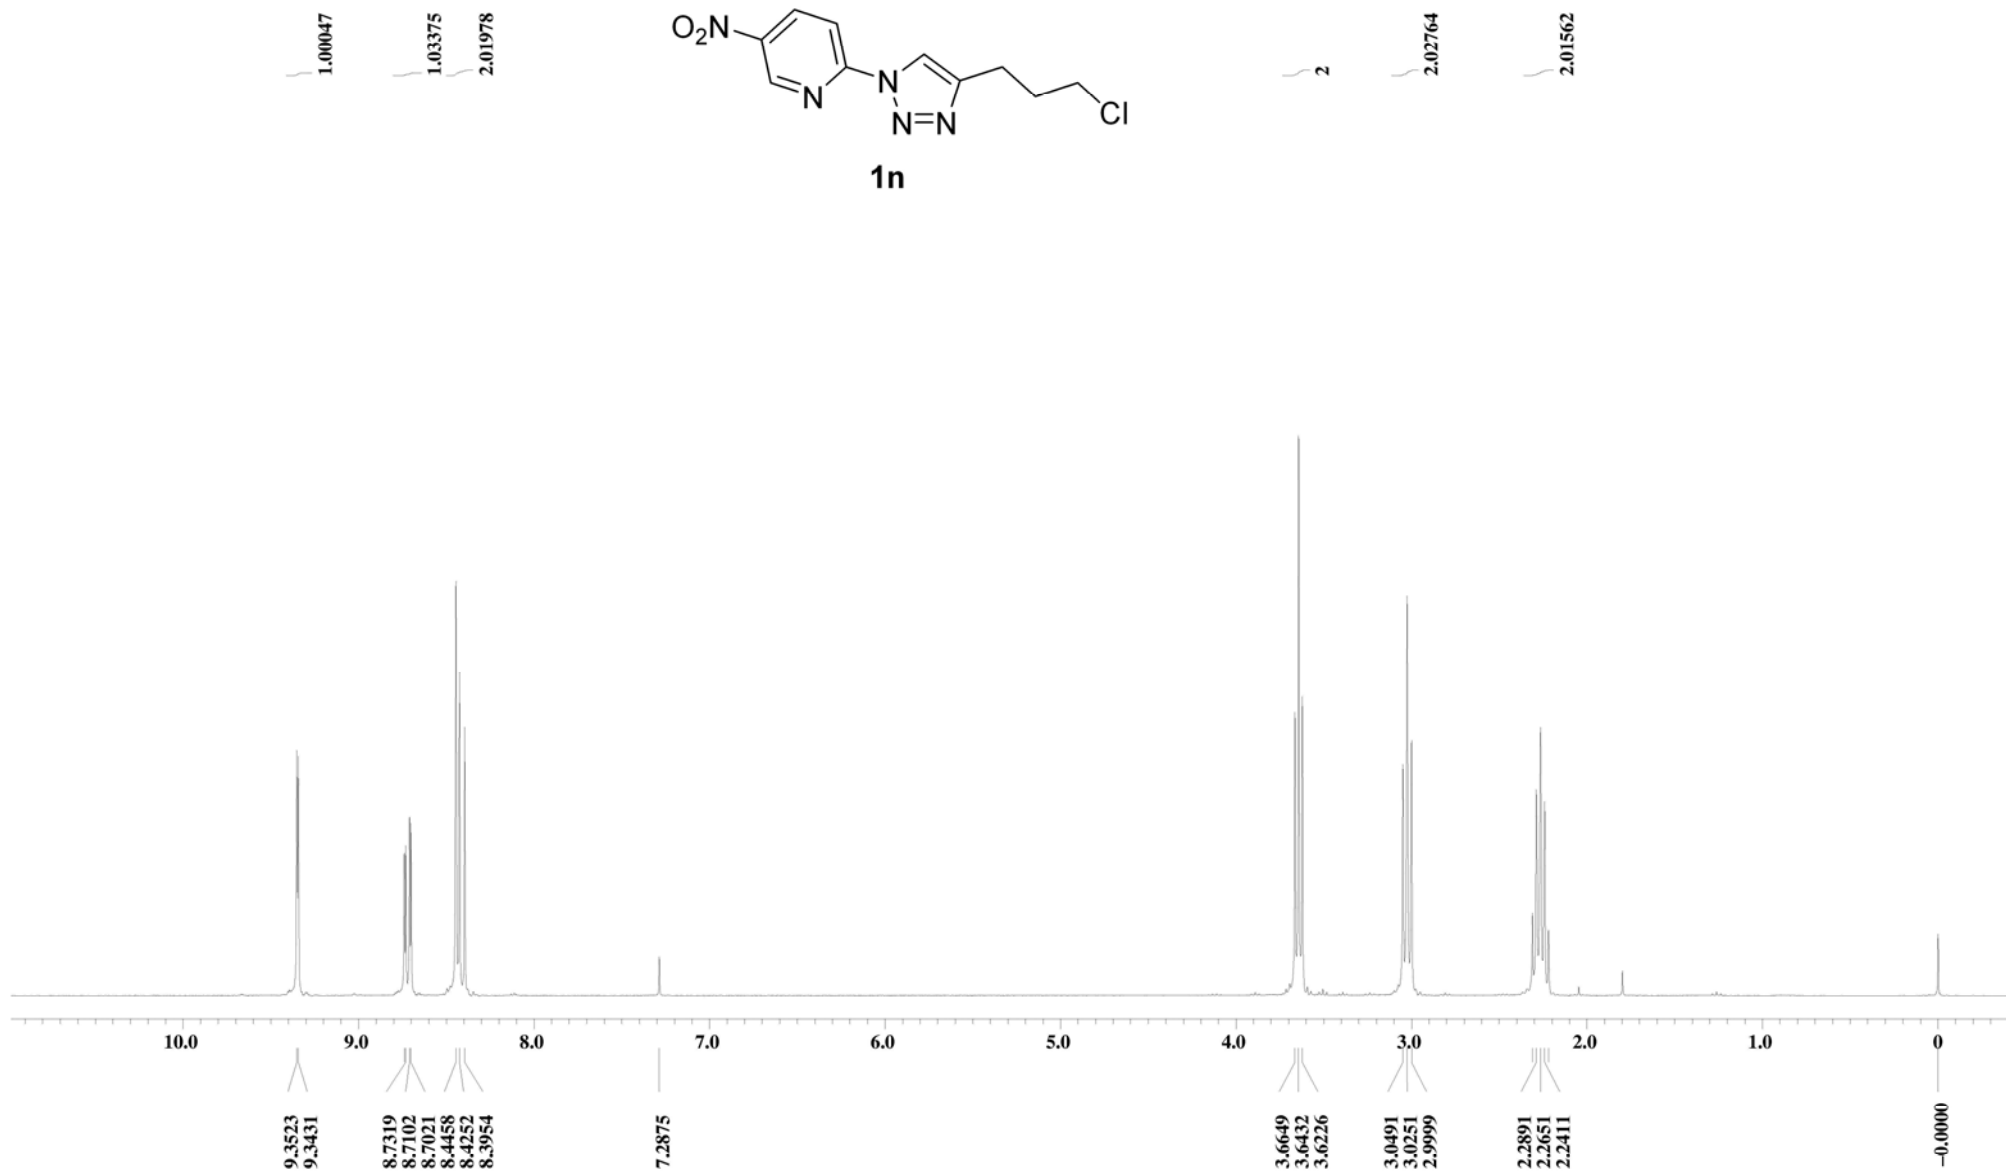

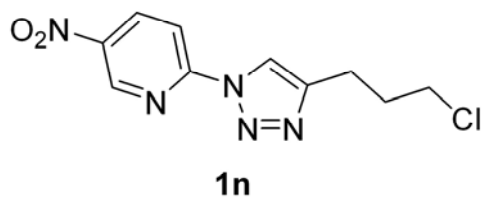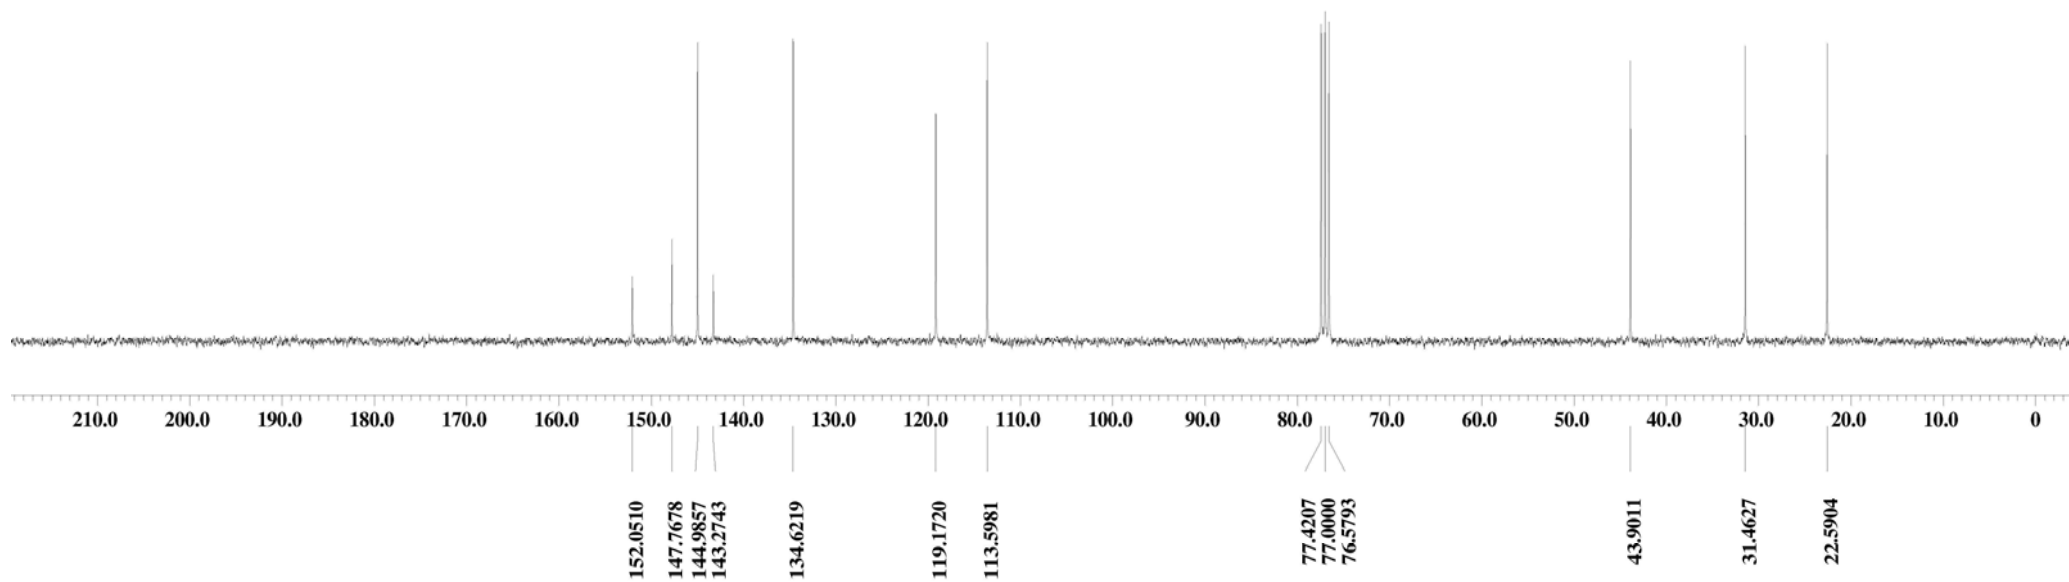

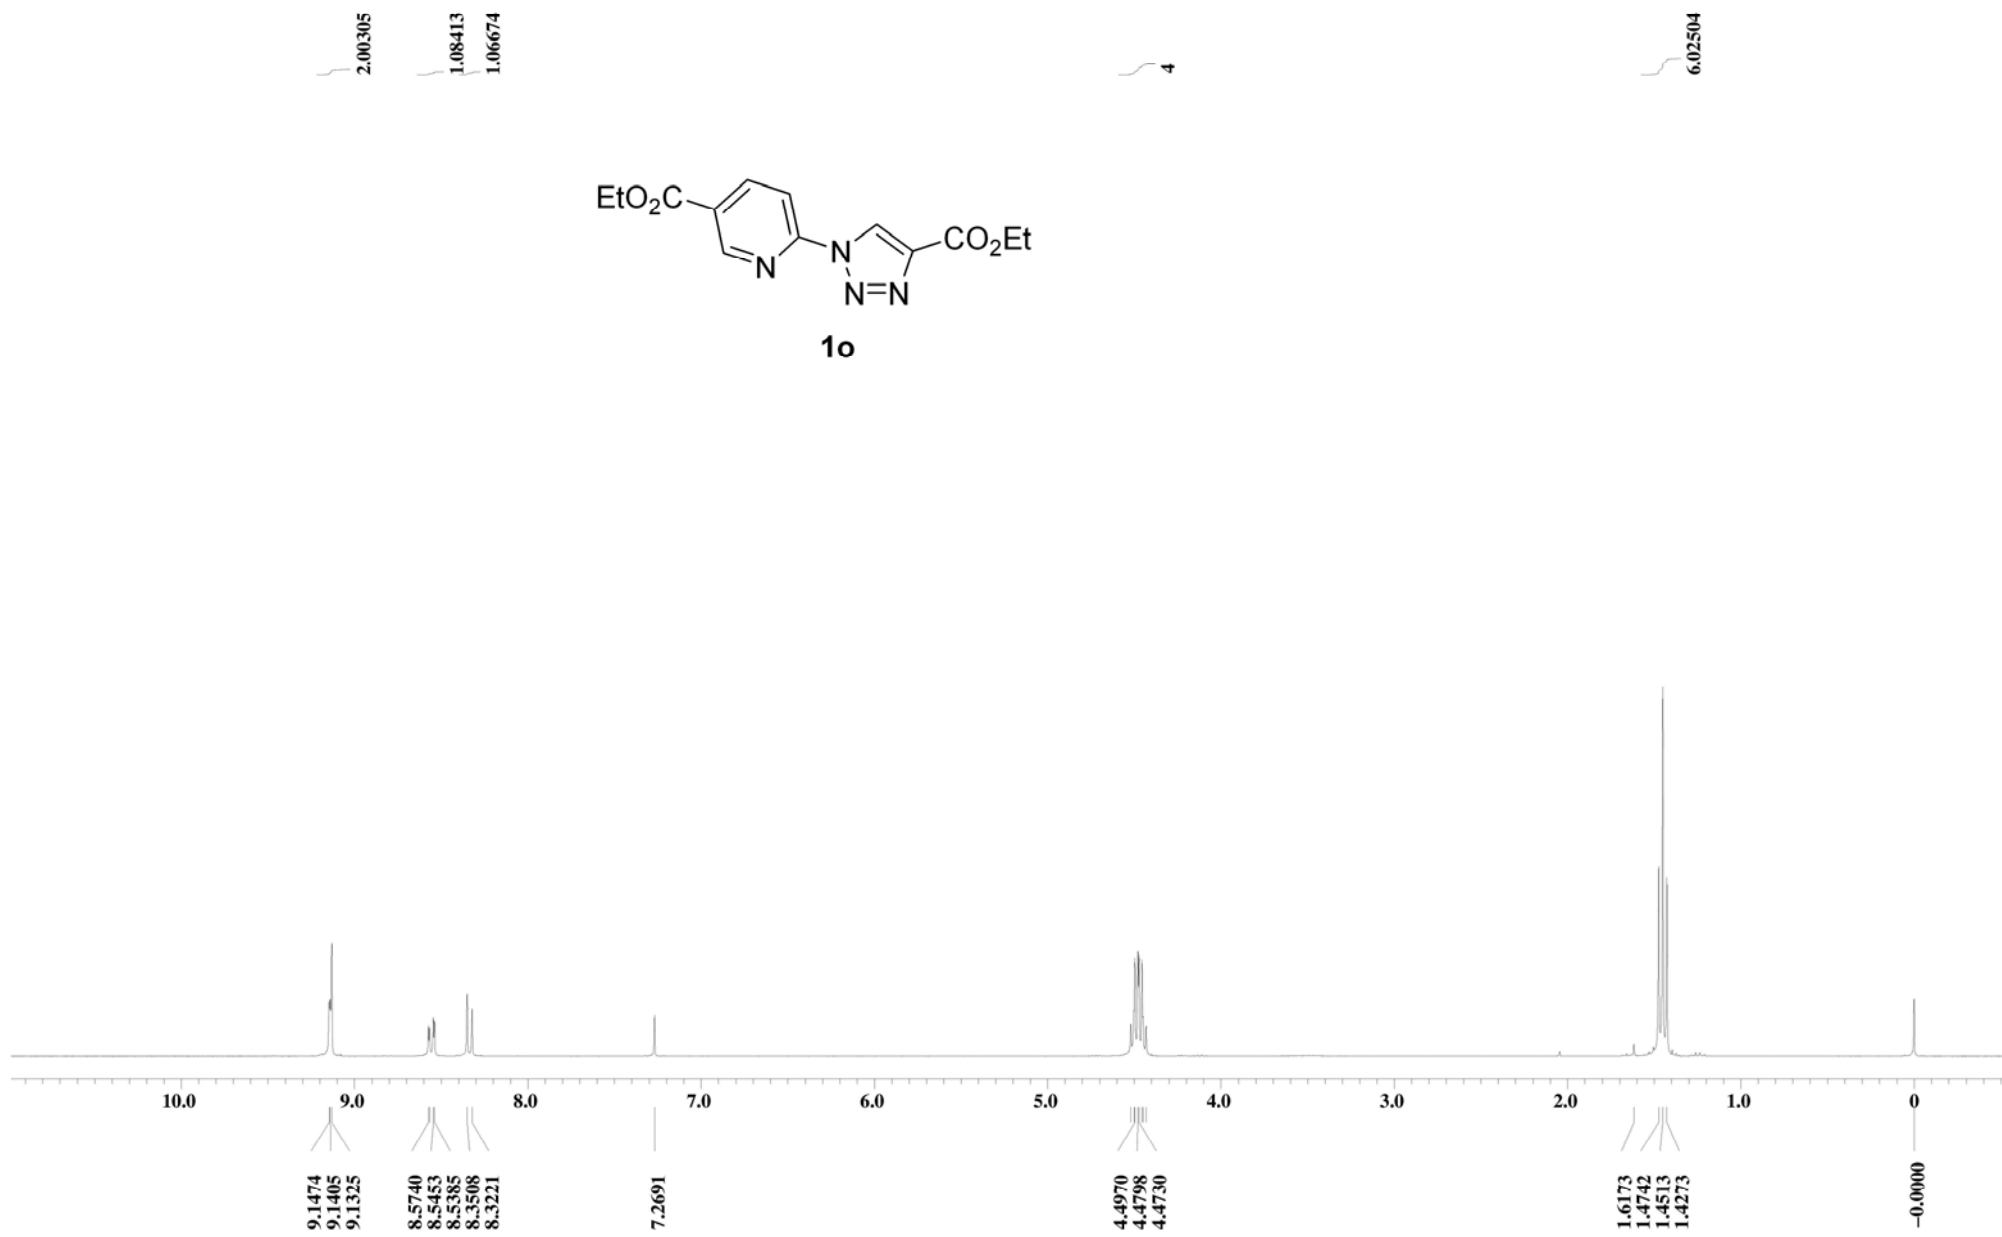

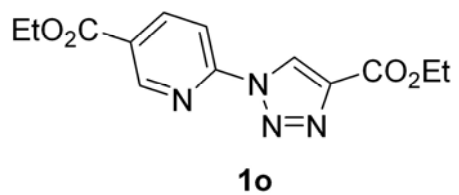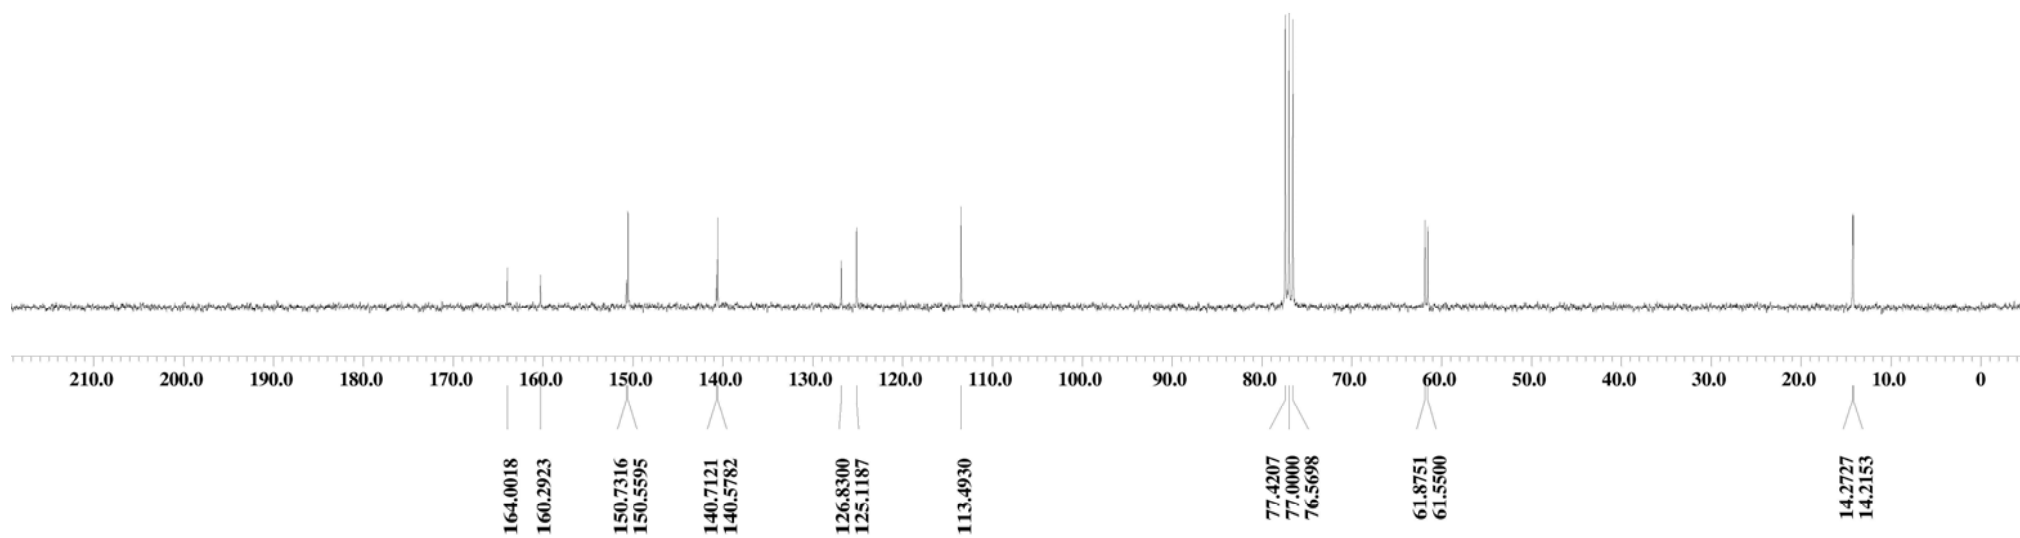



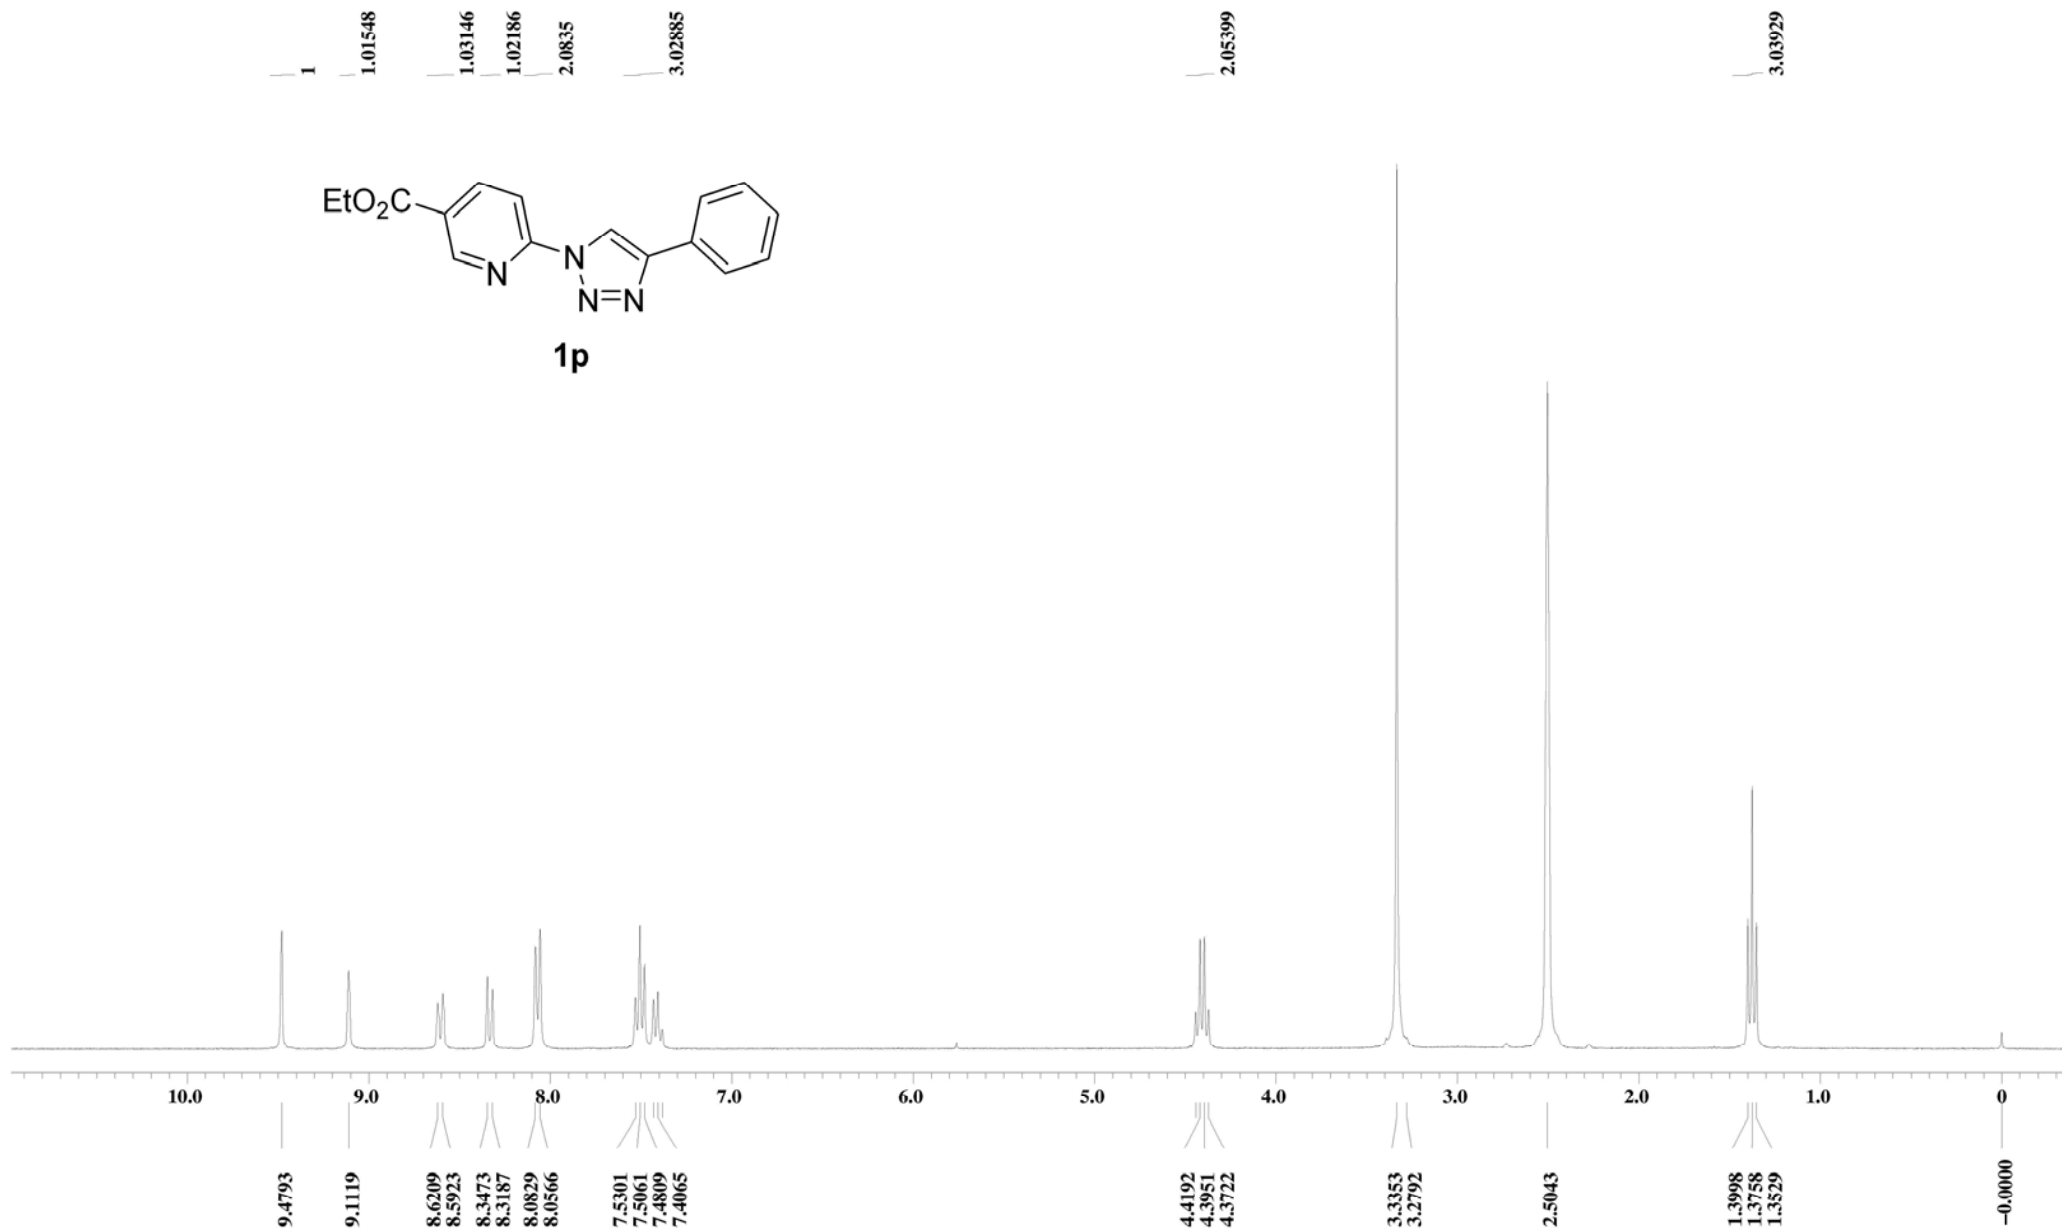

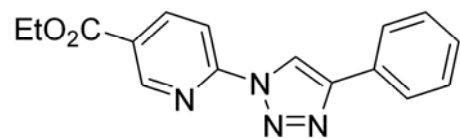

**1p**

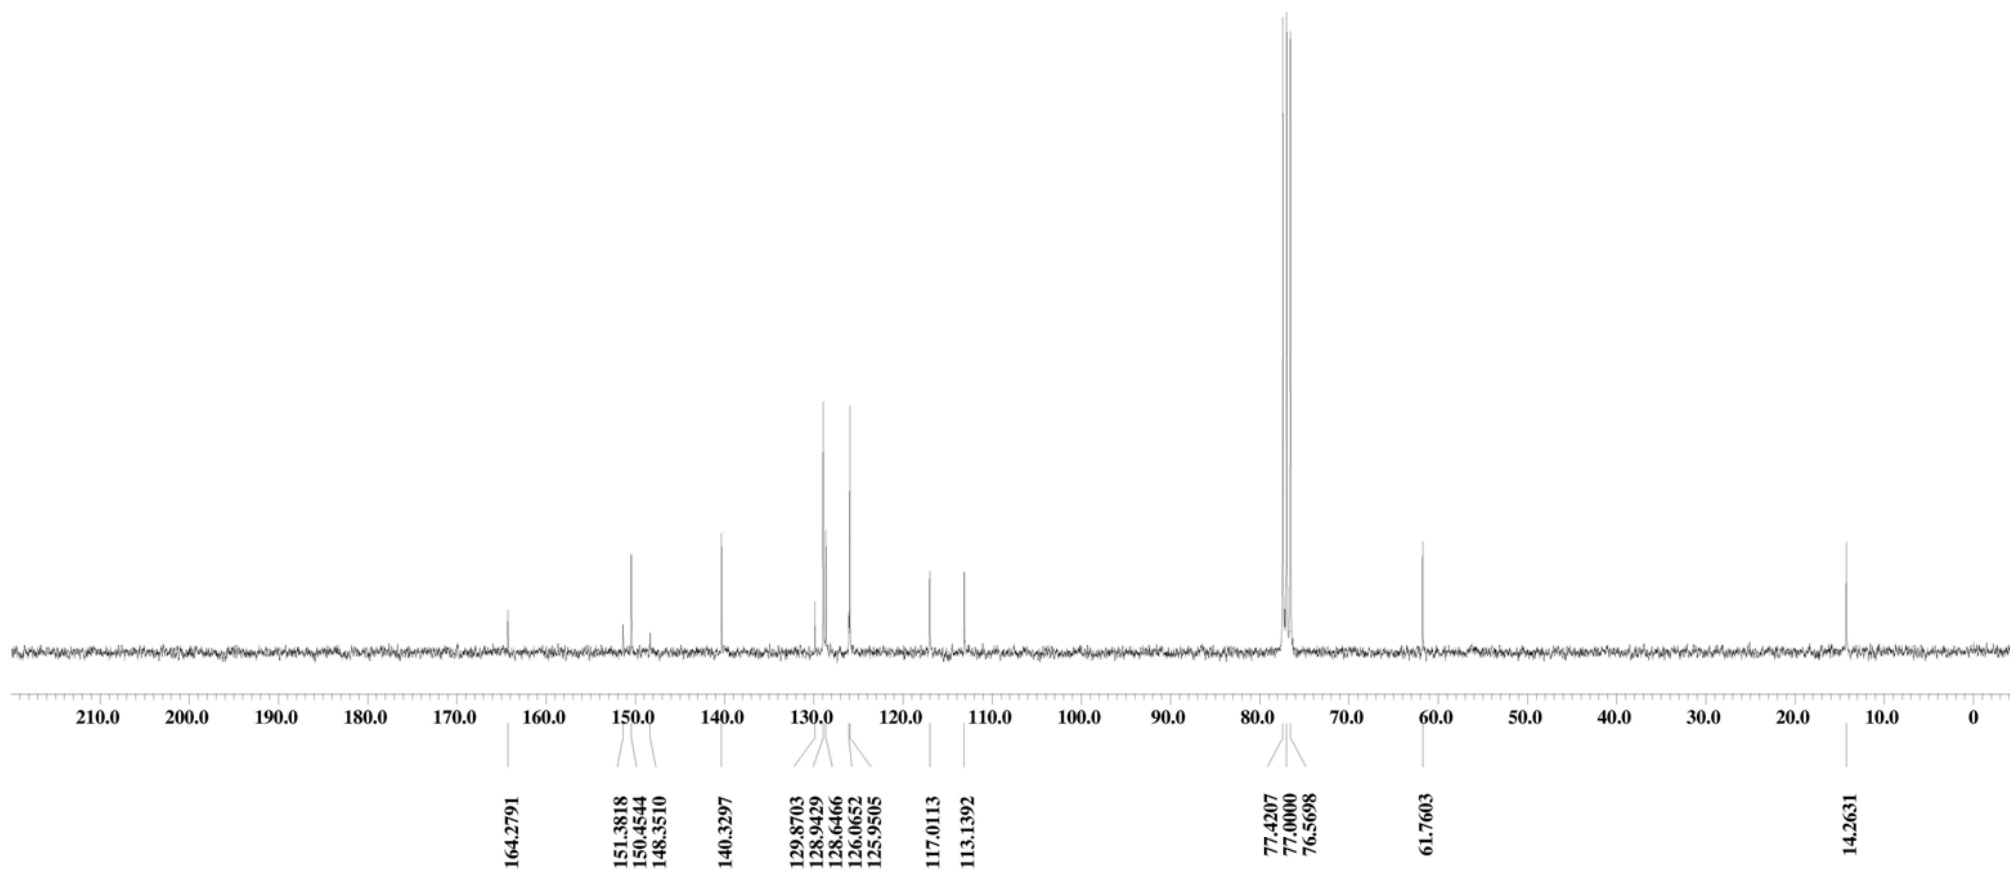

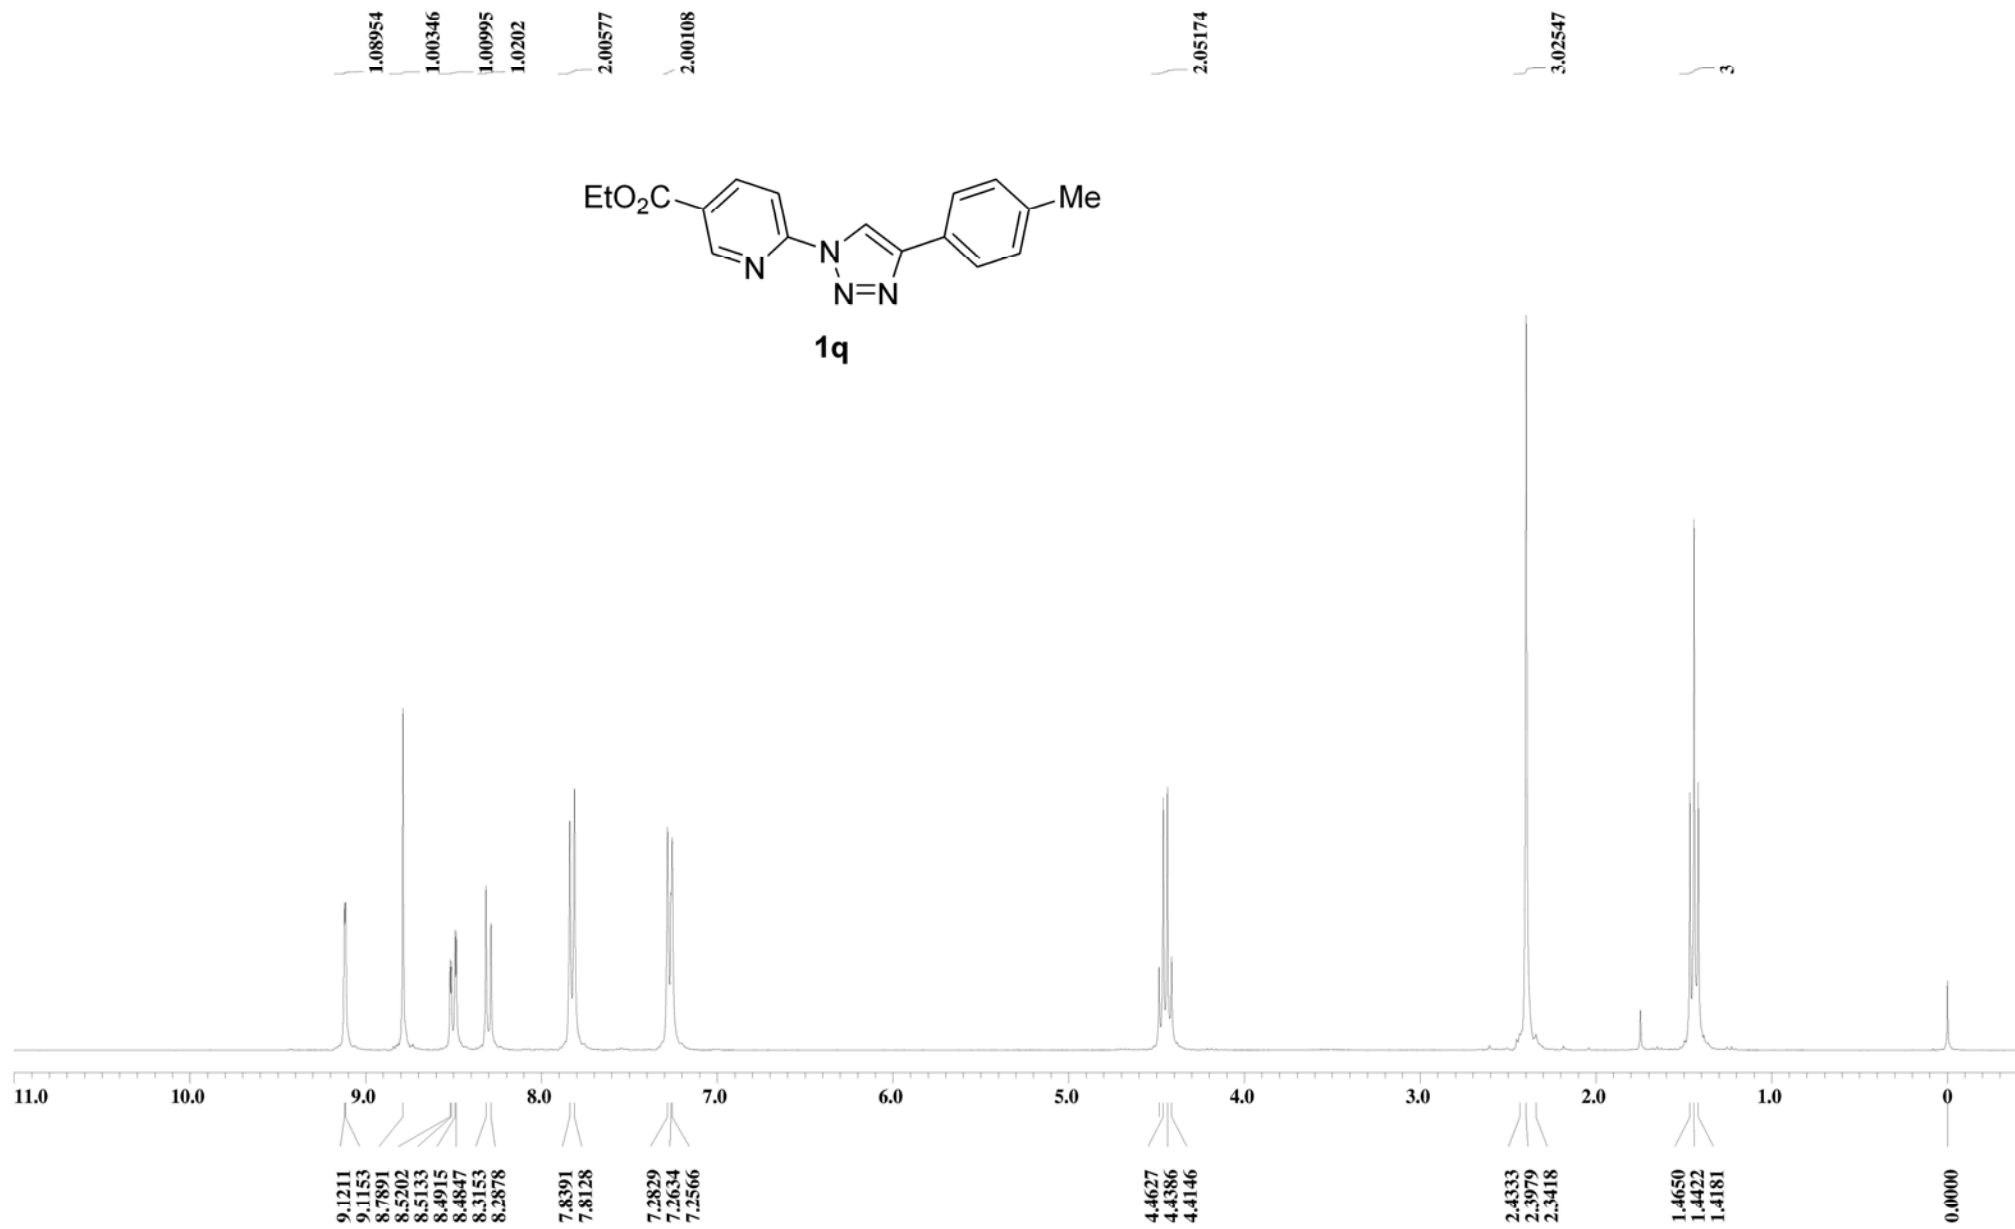

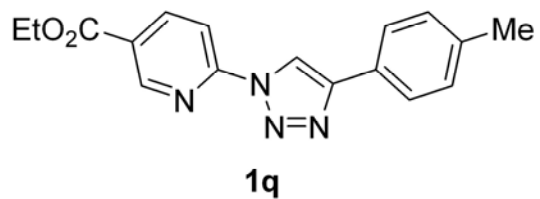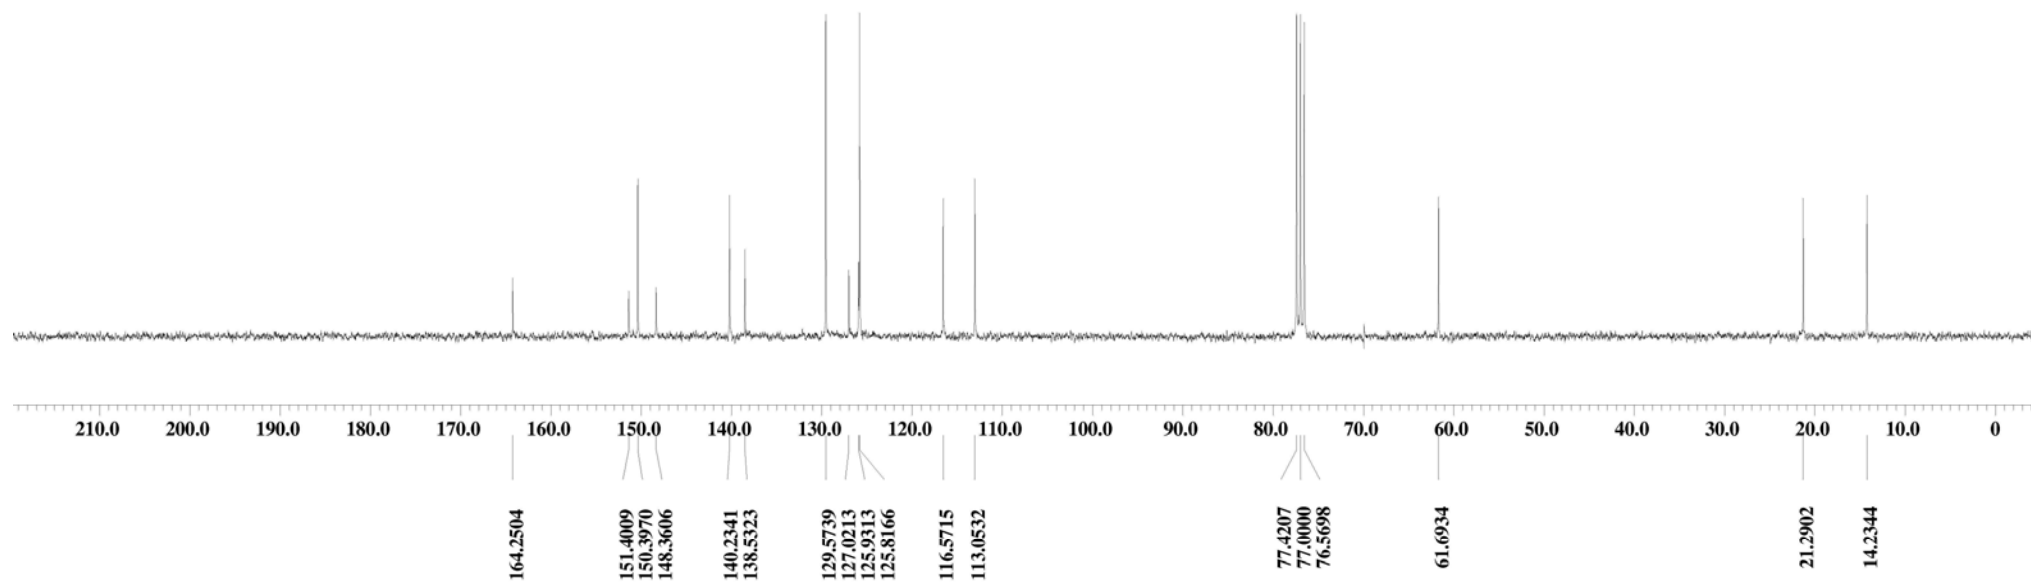

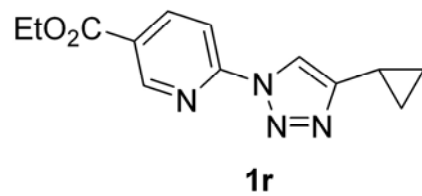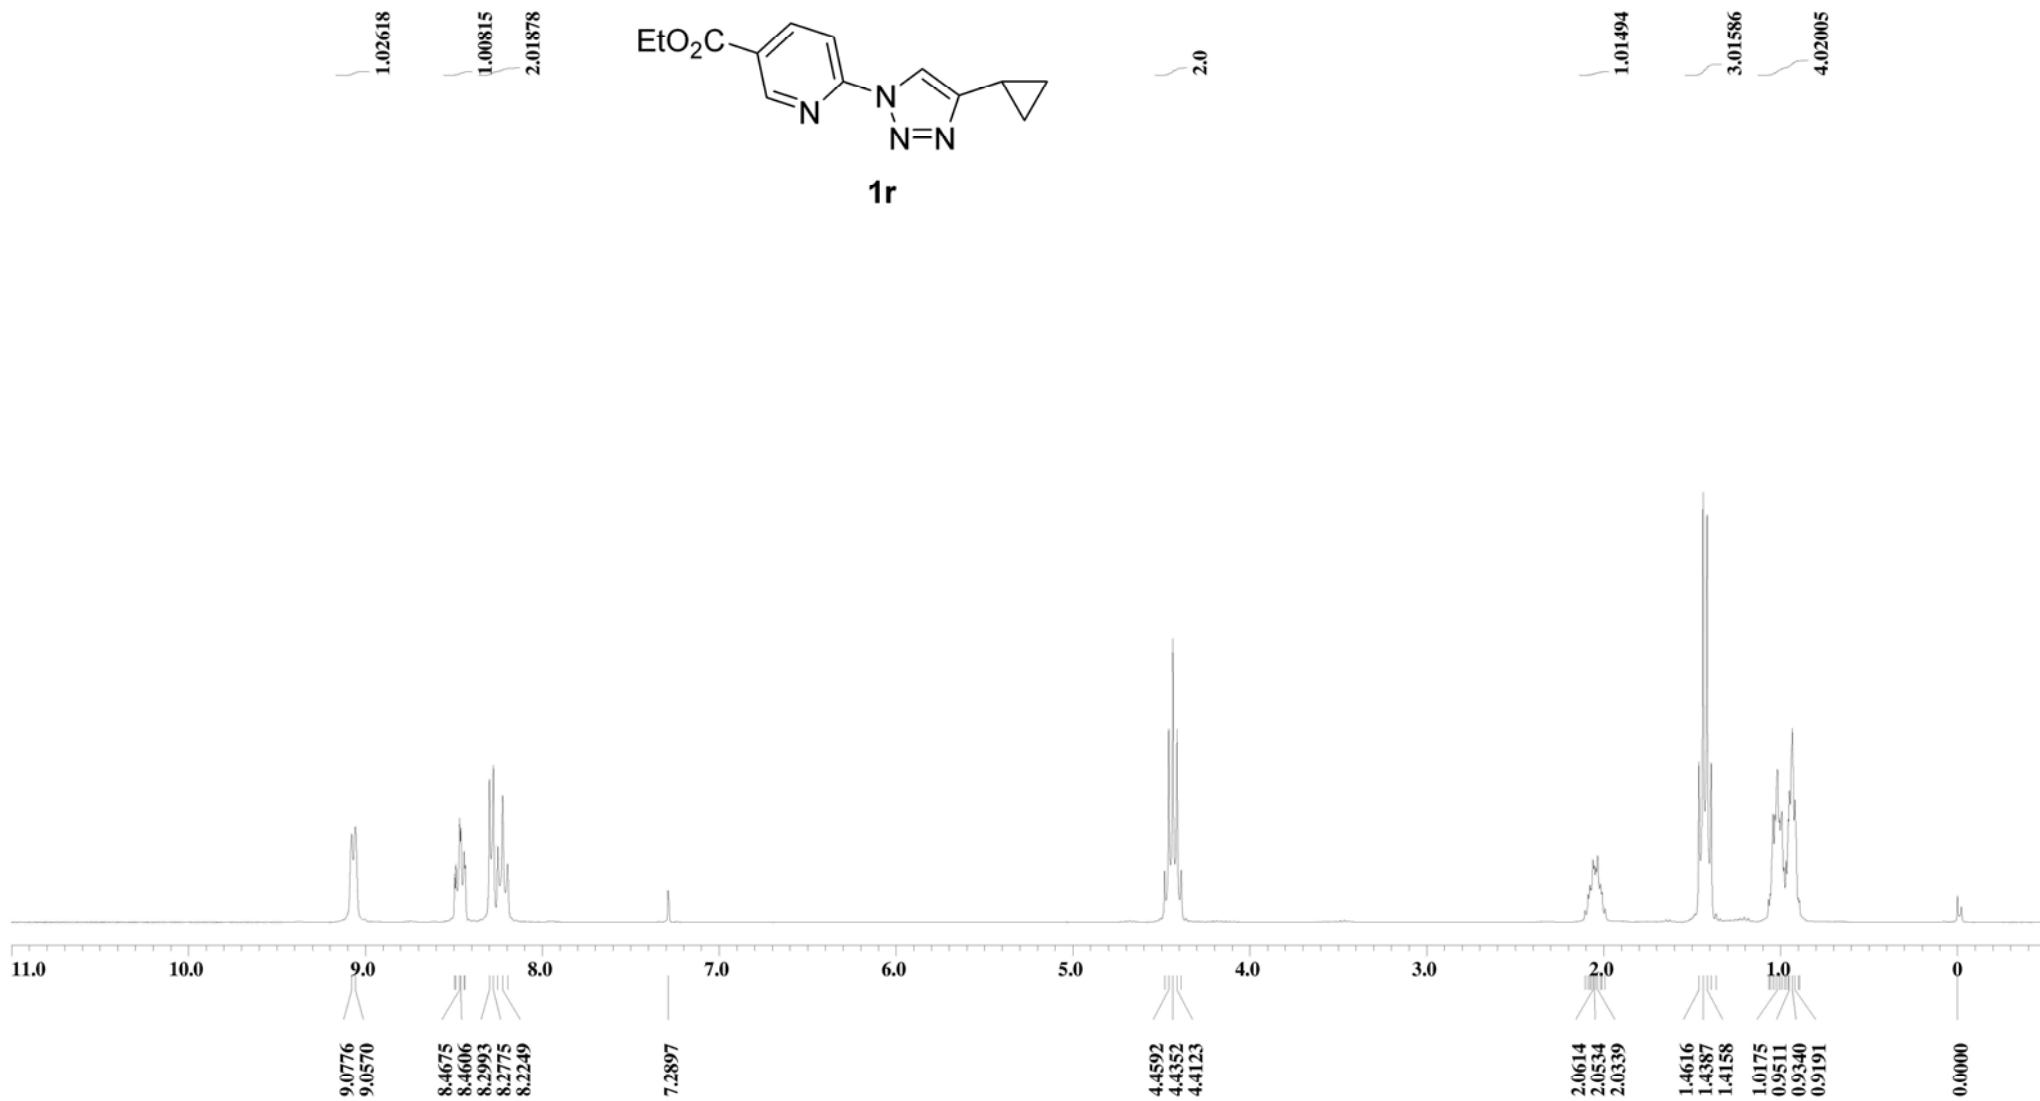

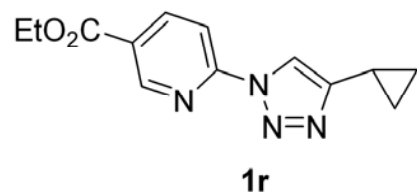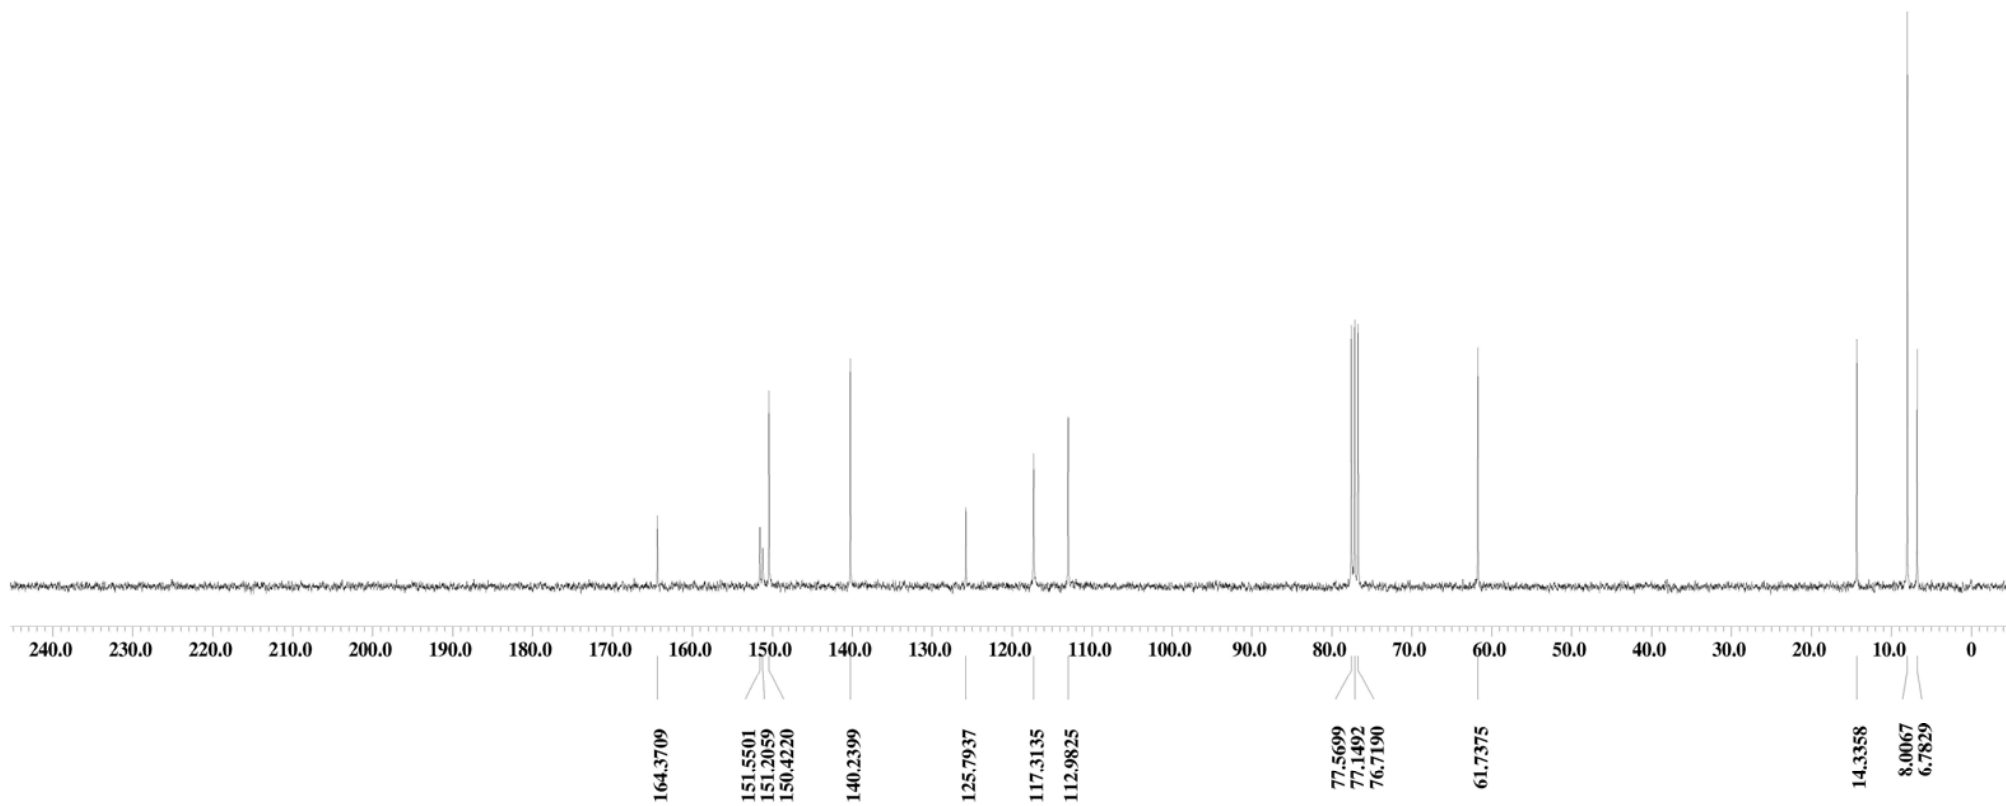

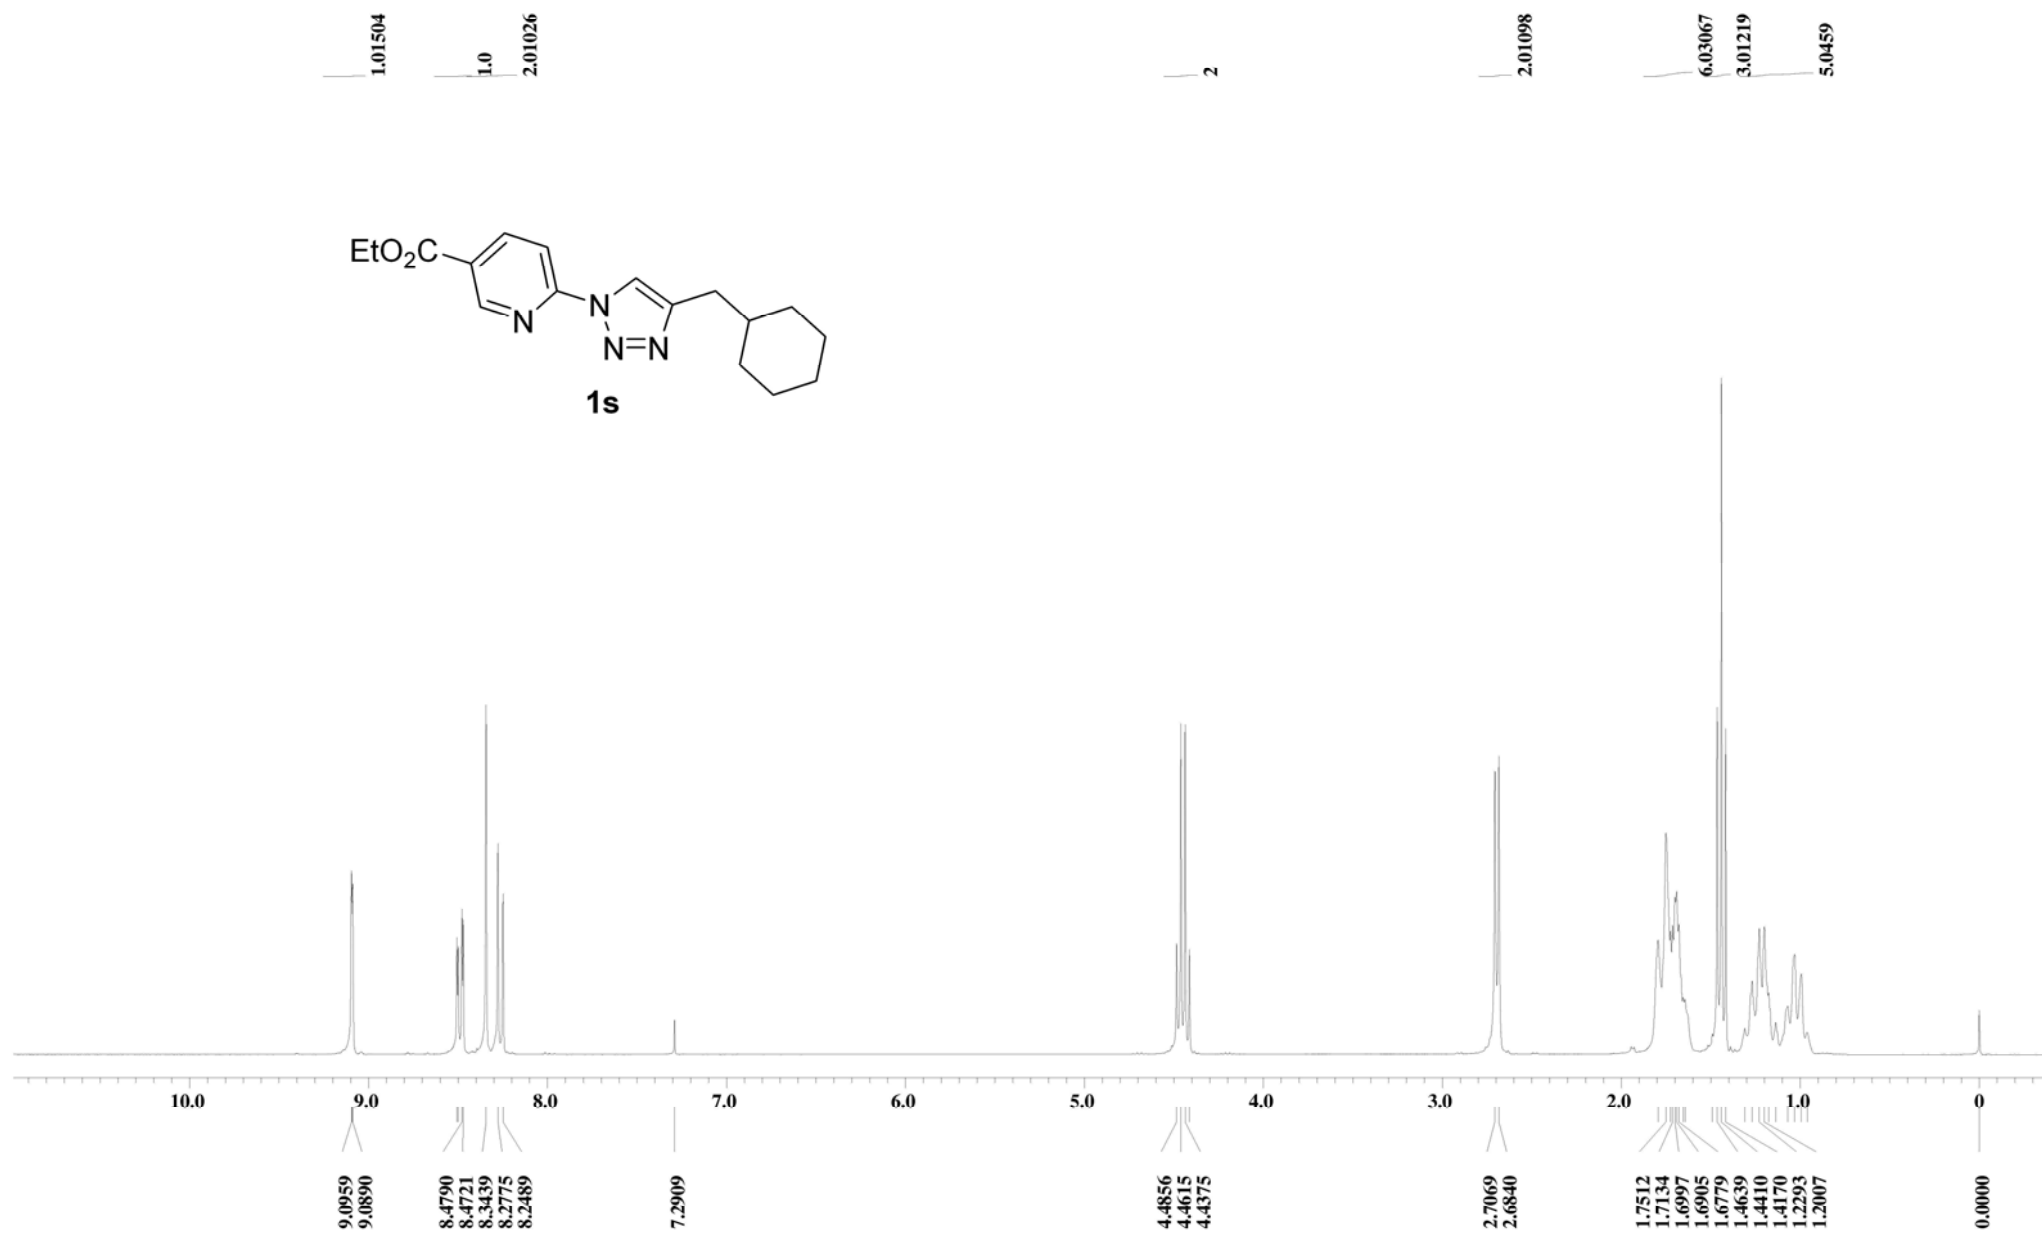

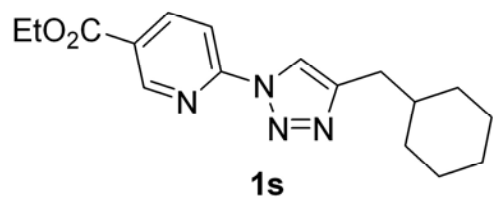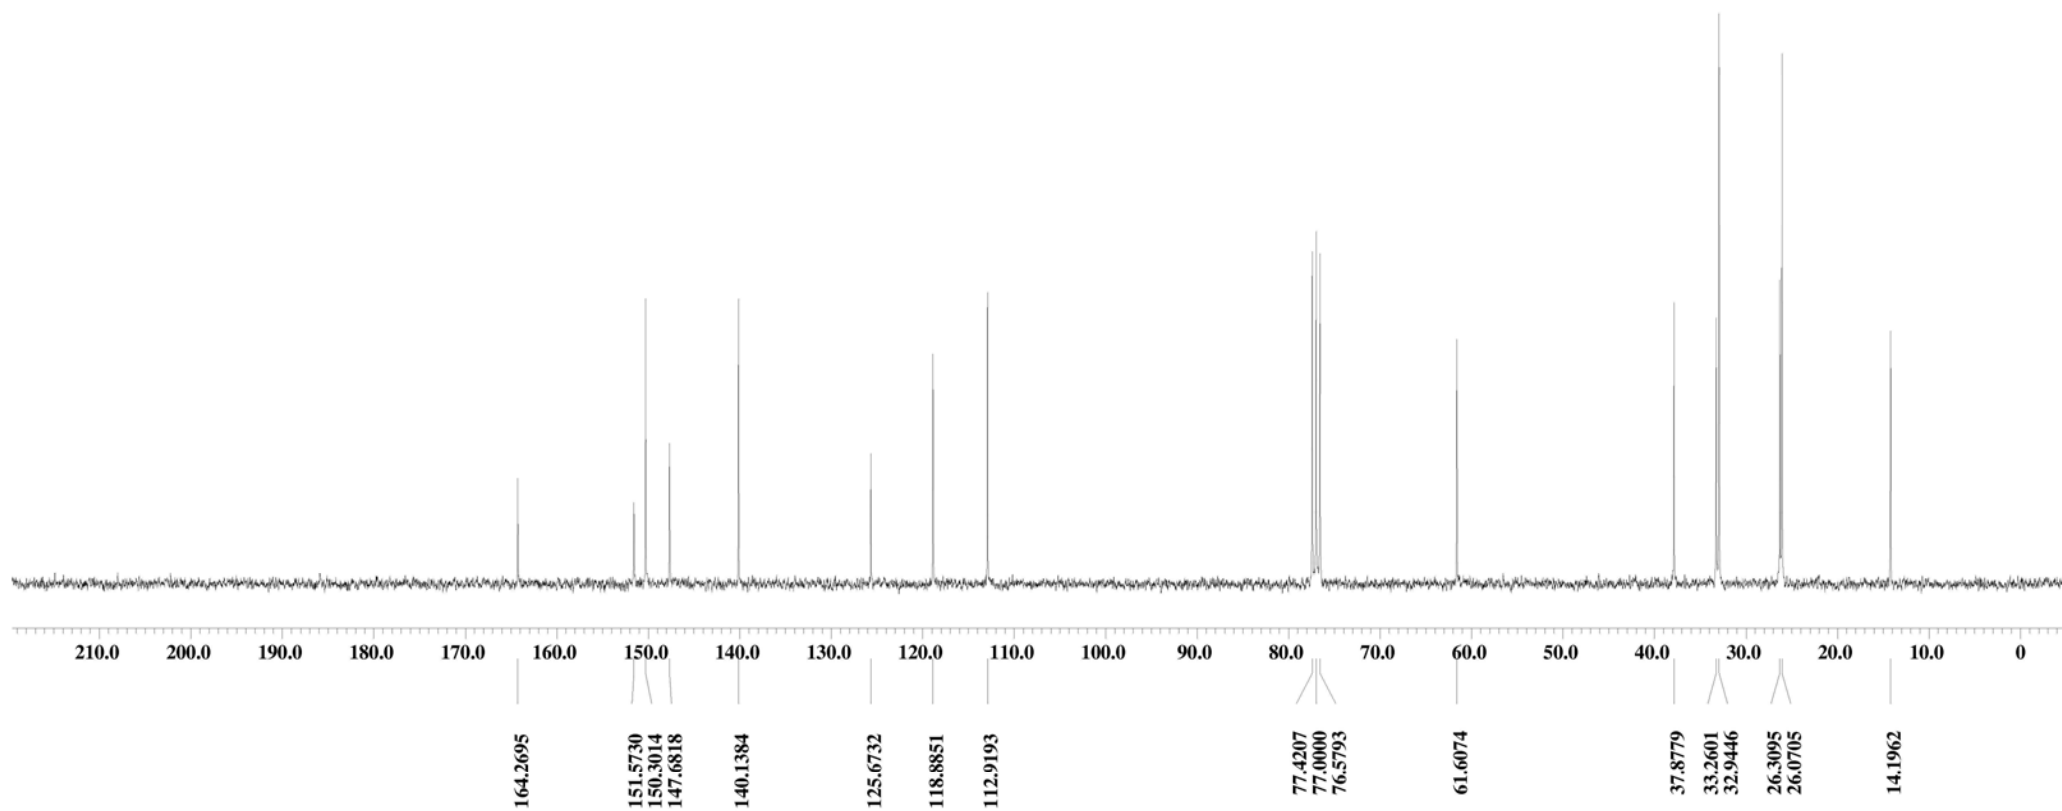



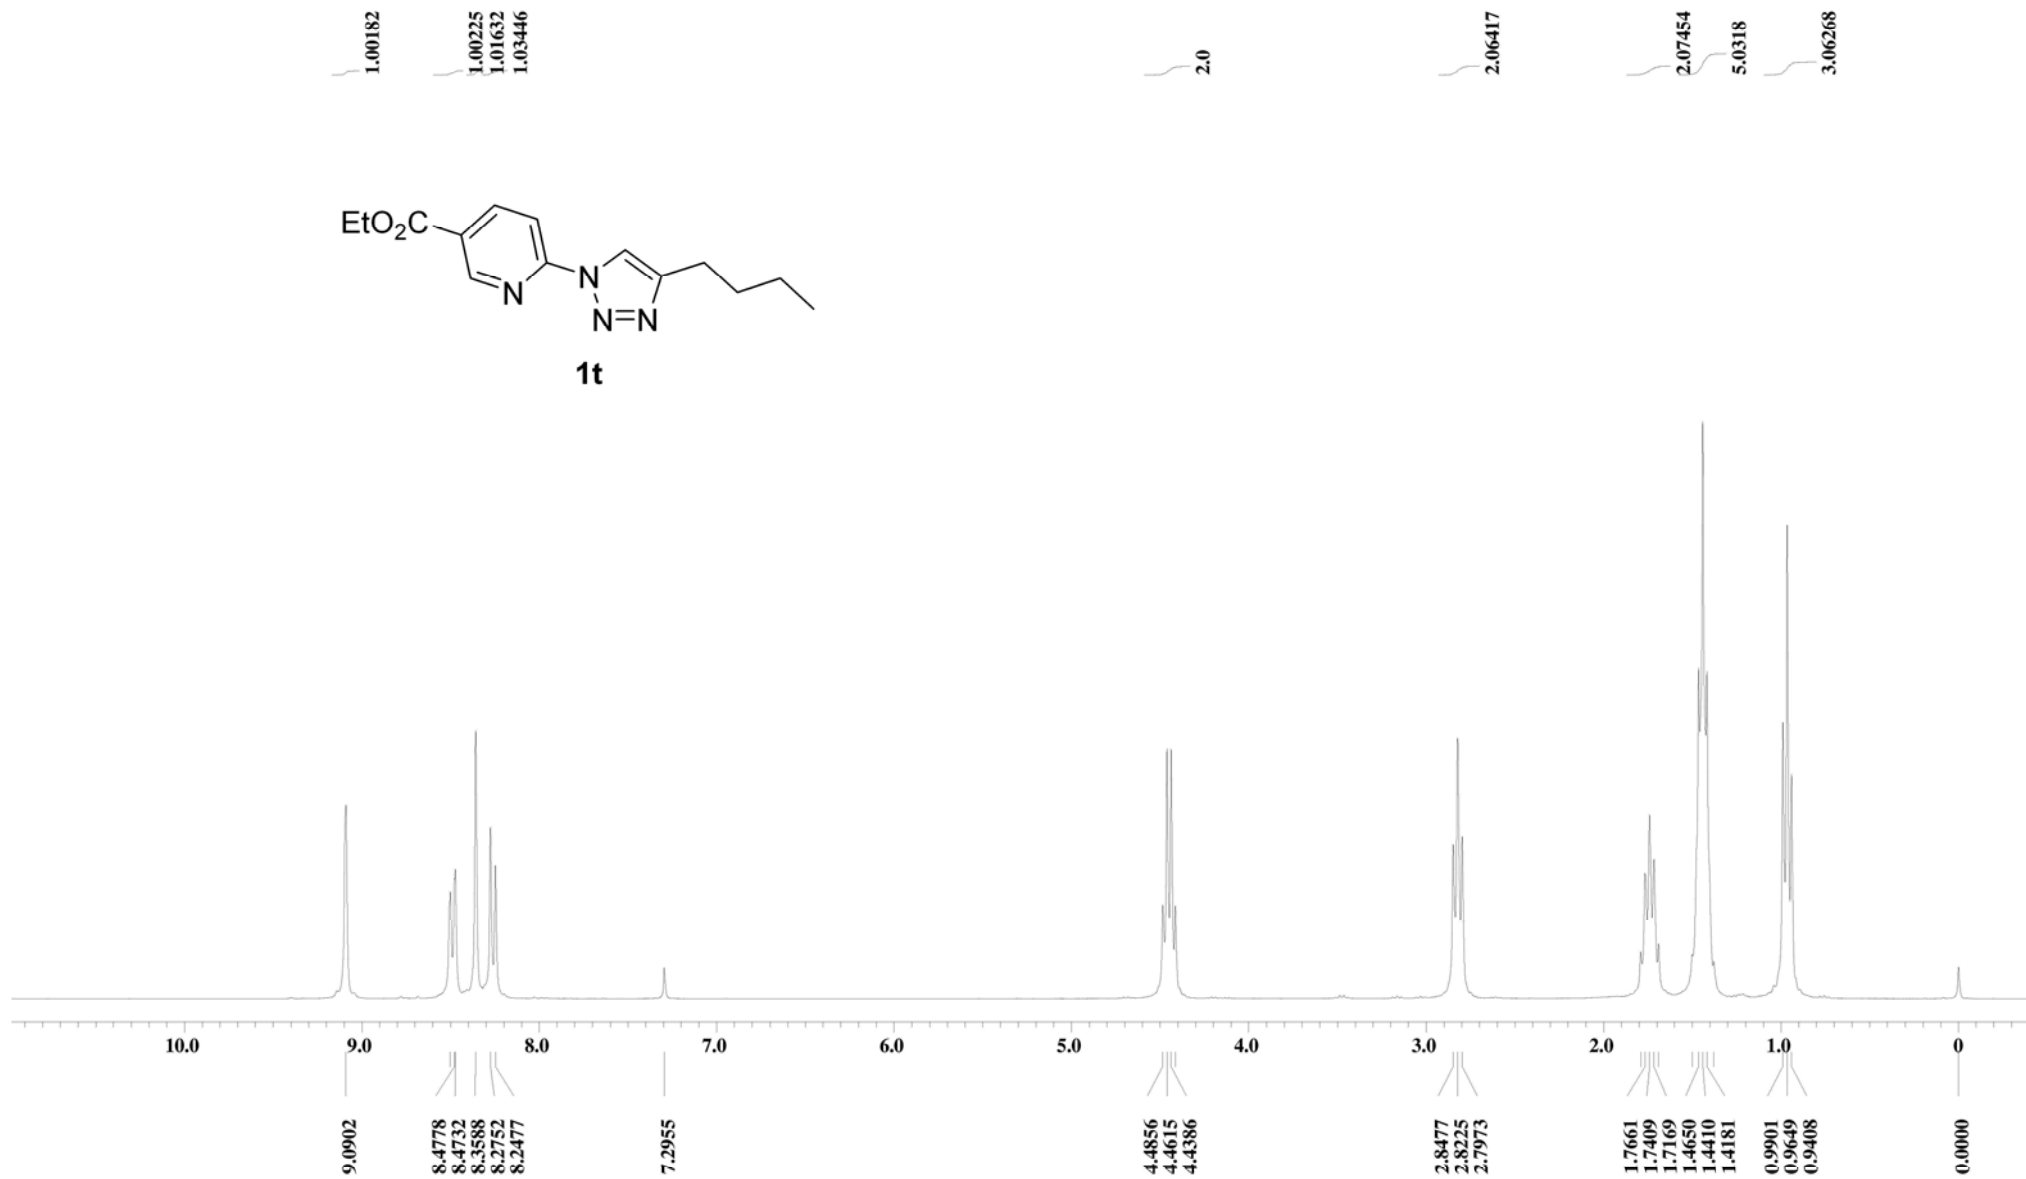

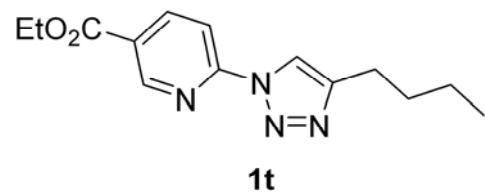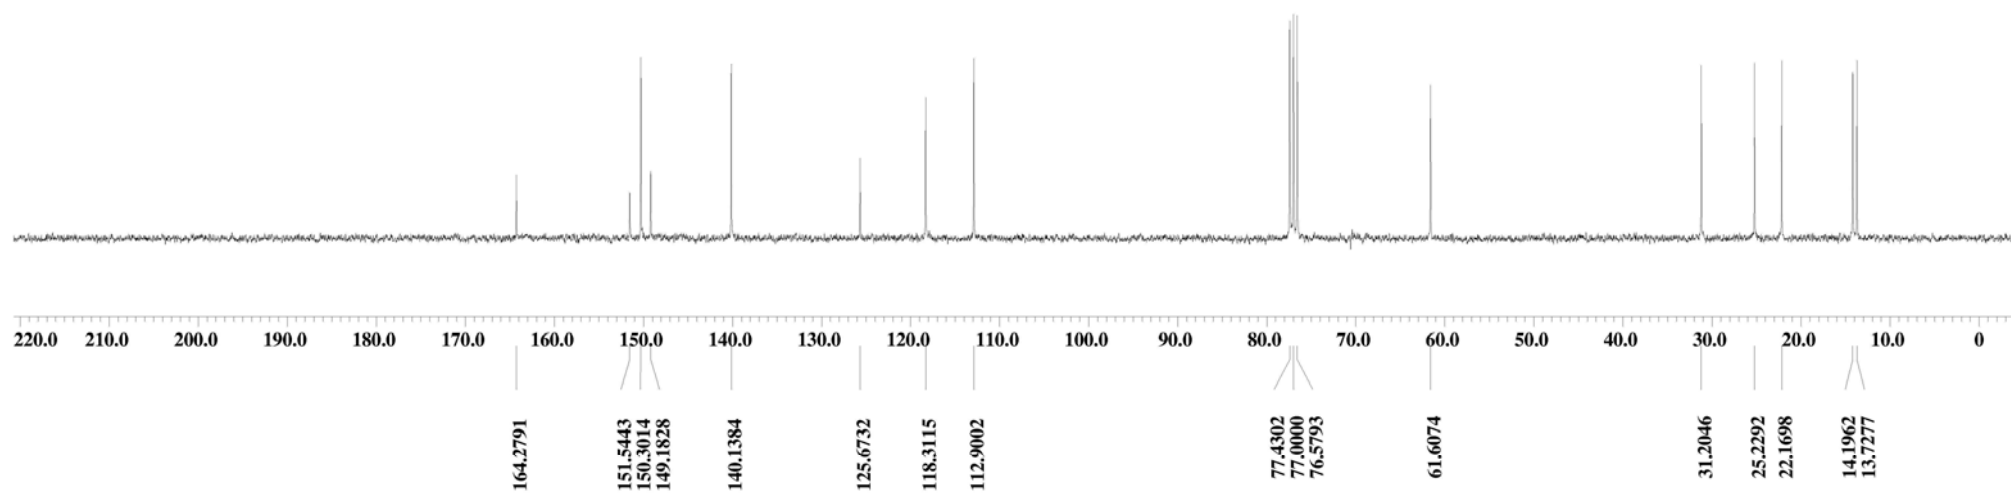

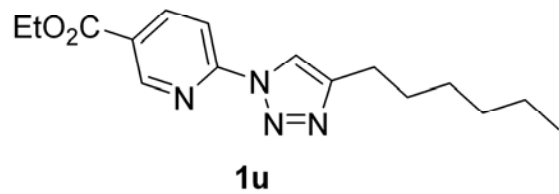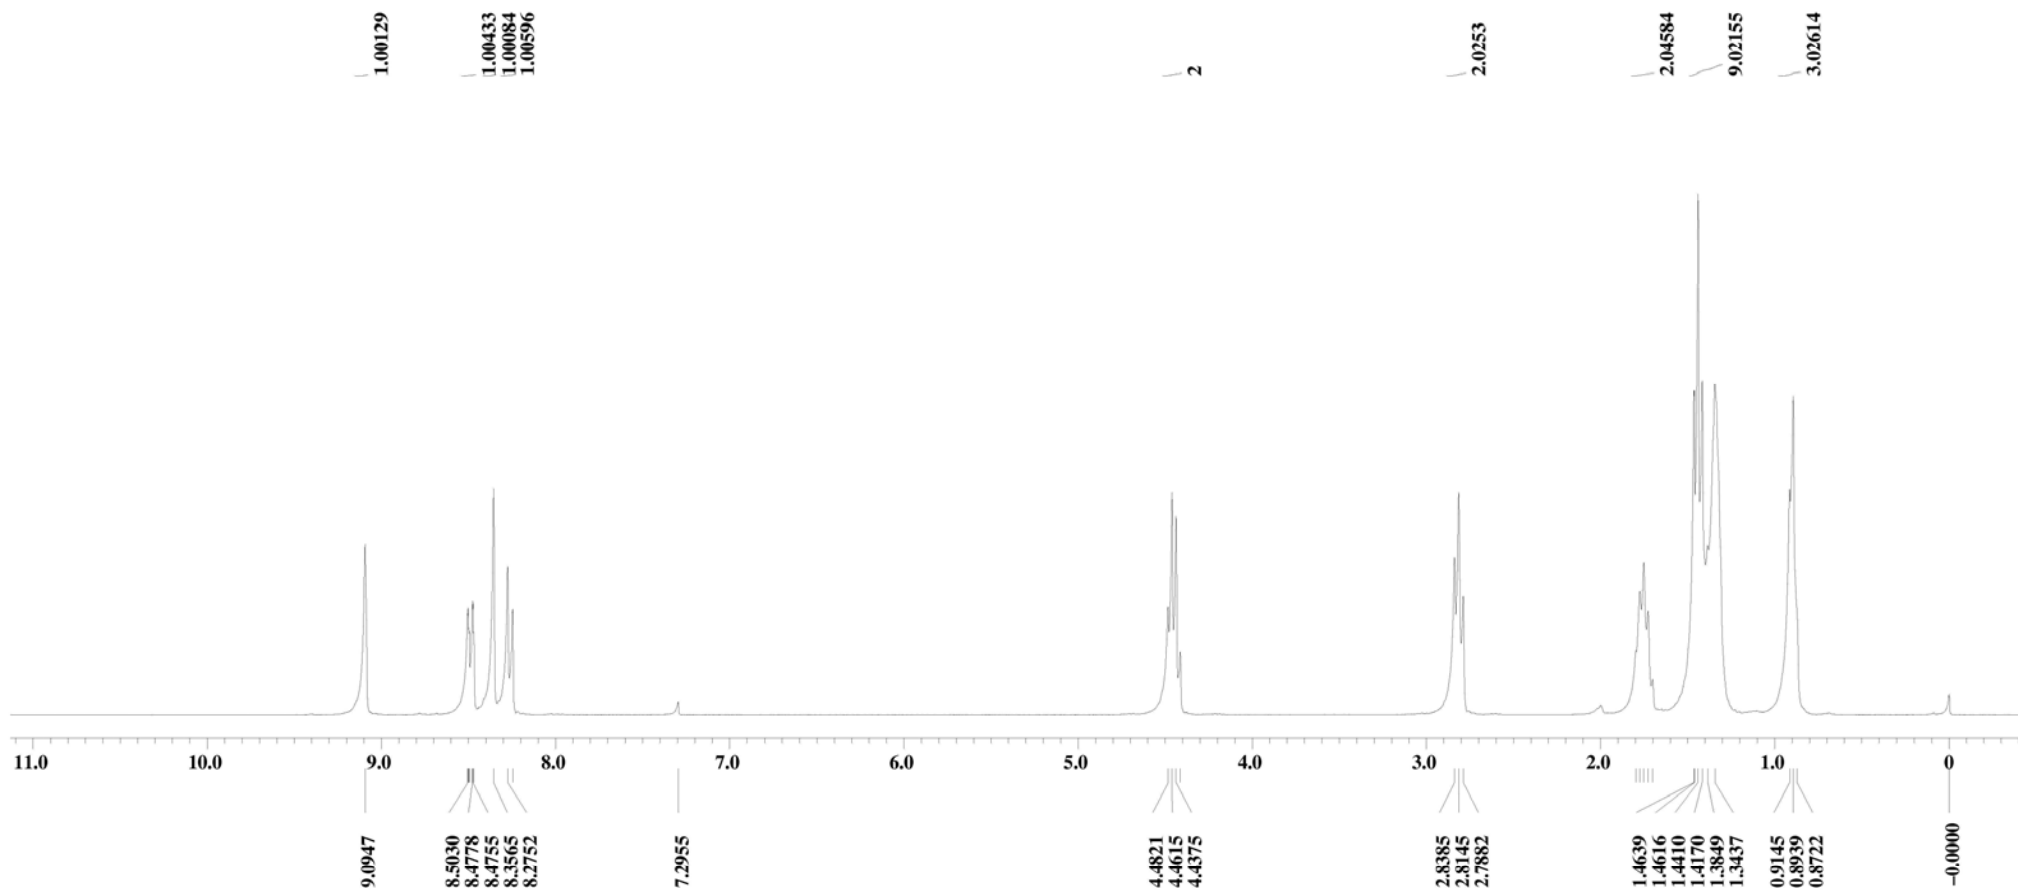

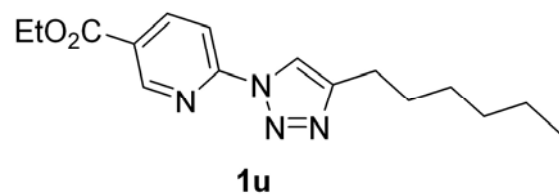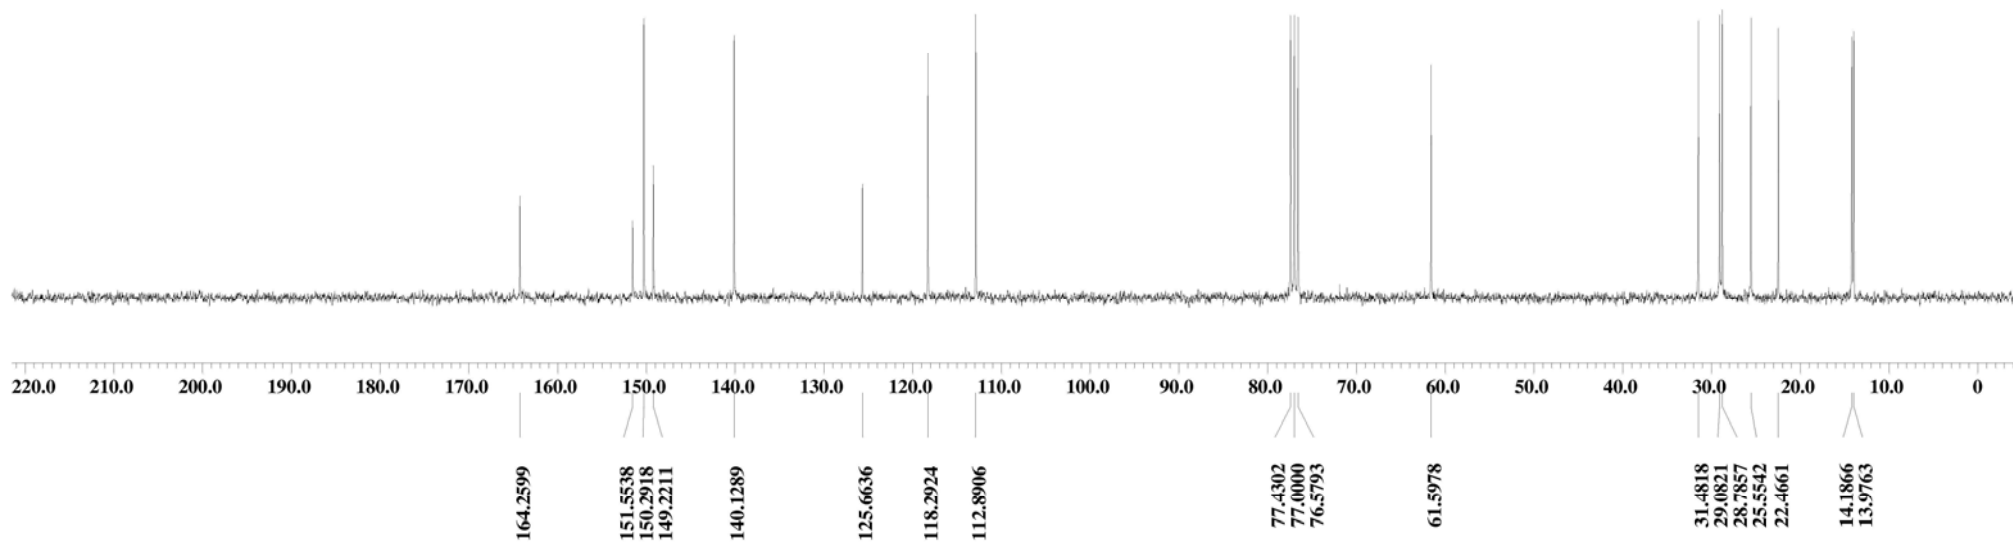

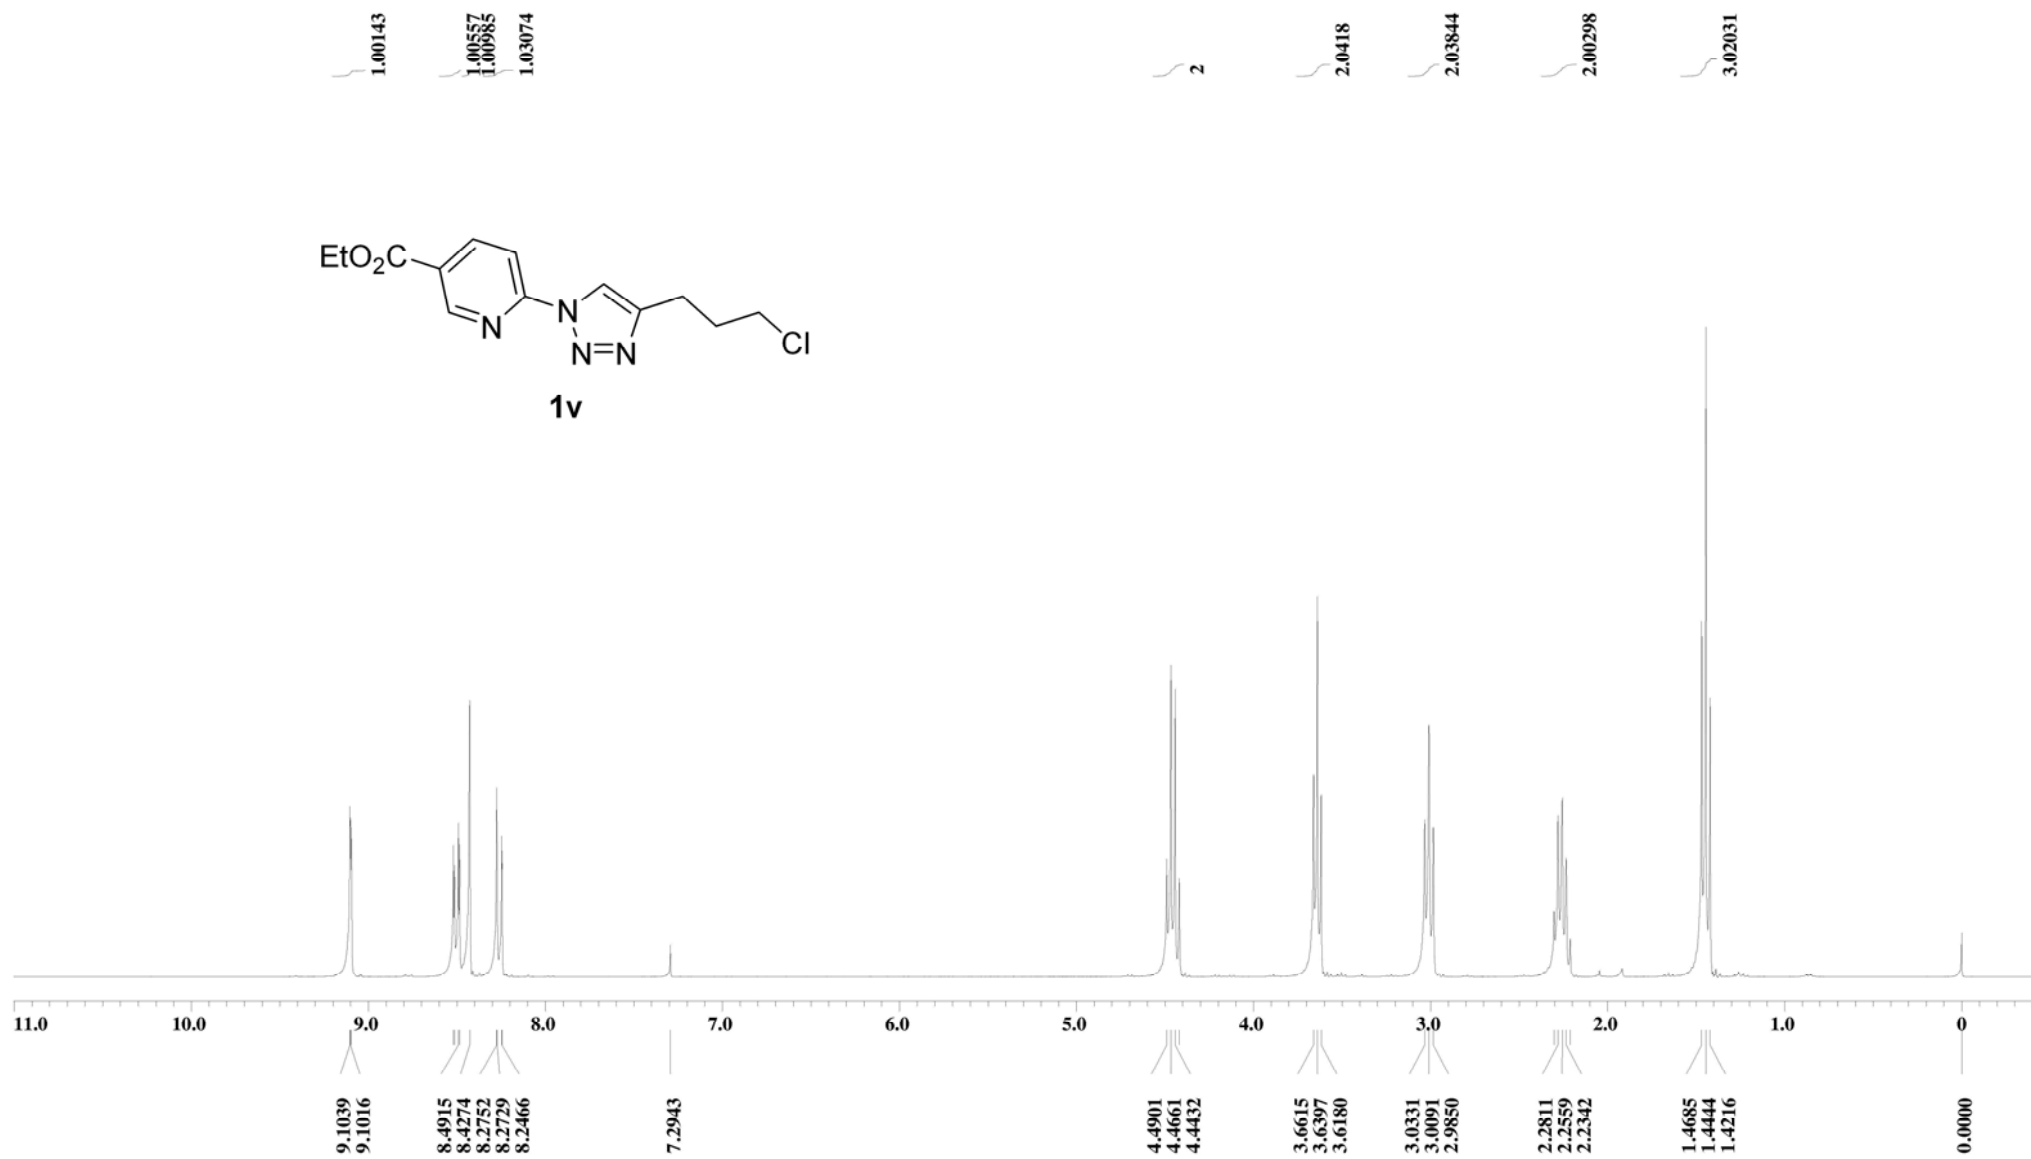

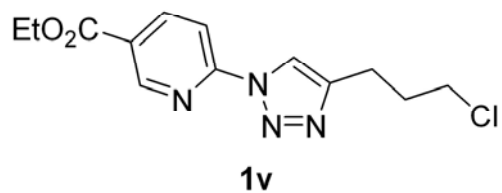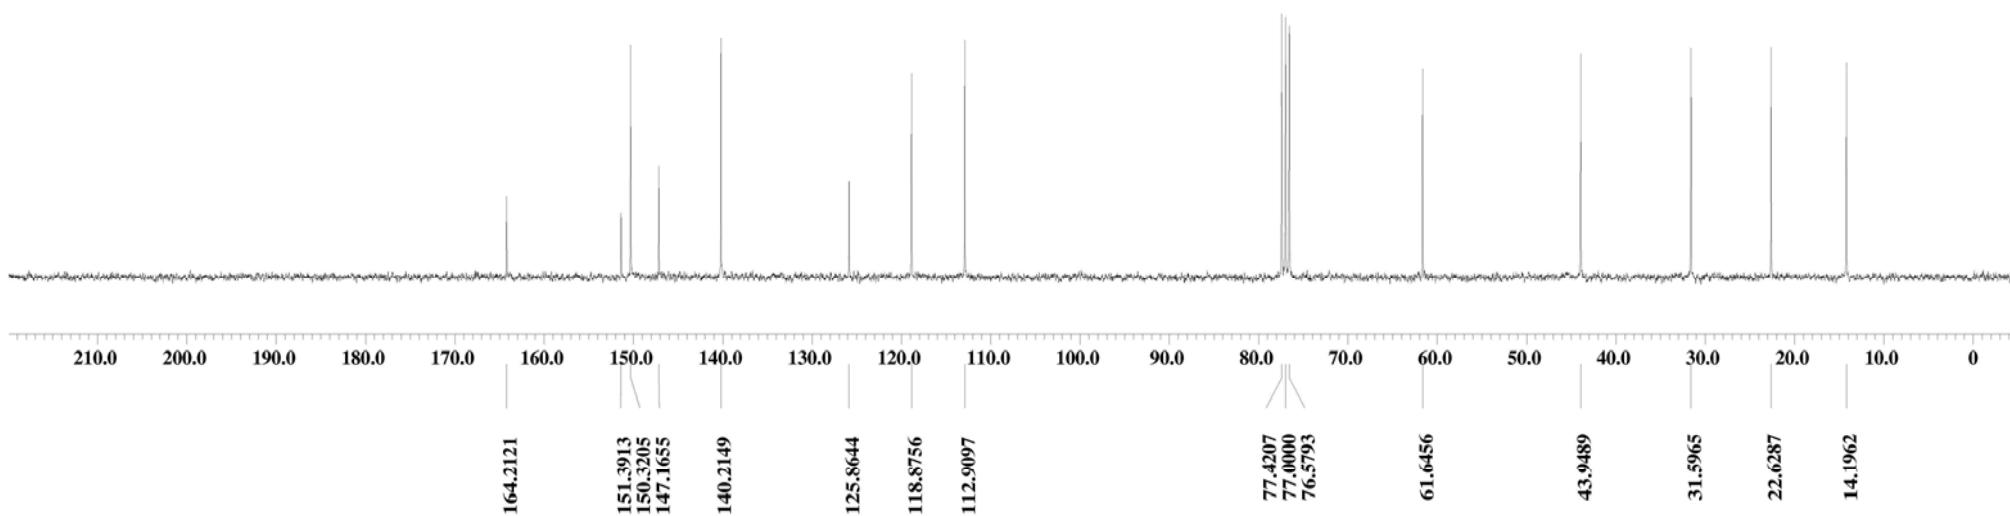

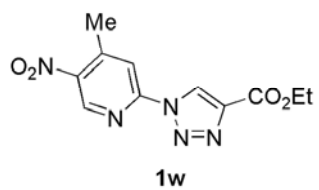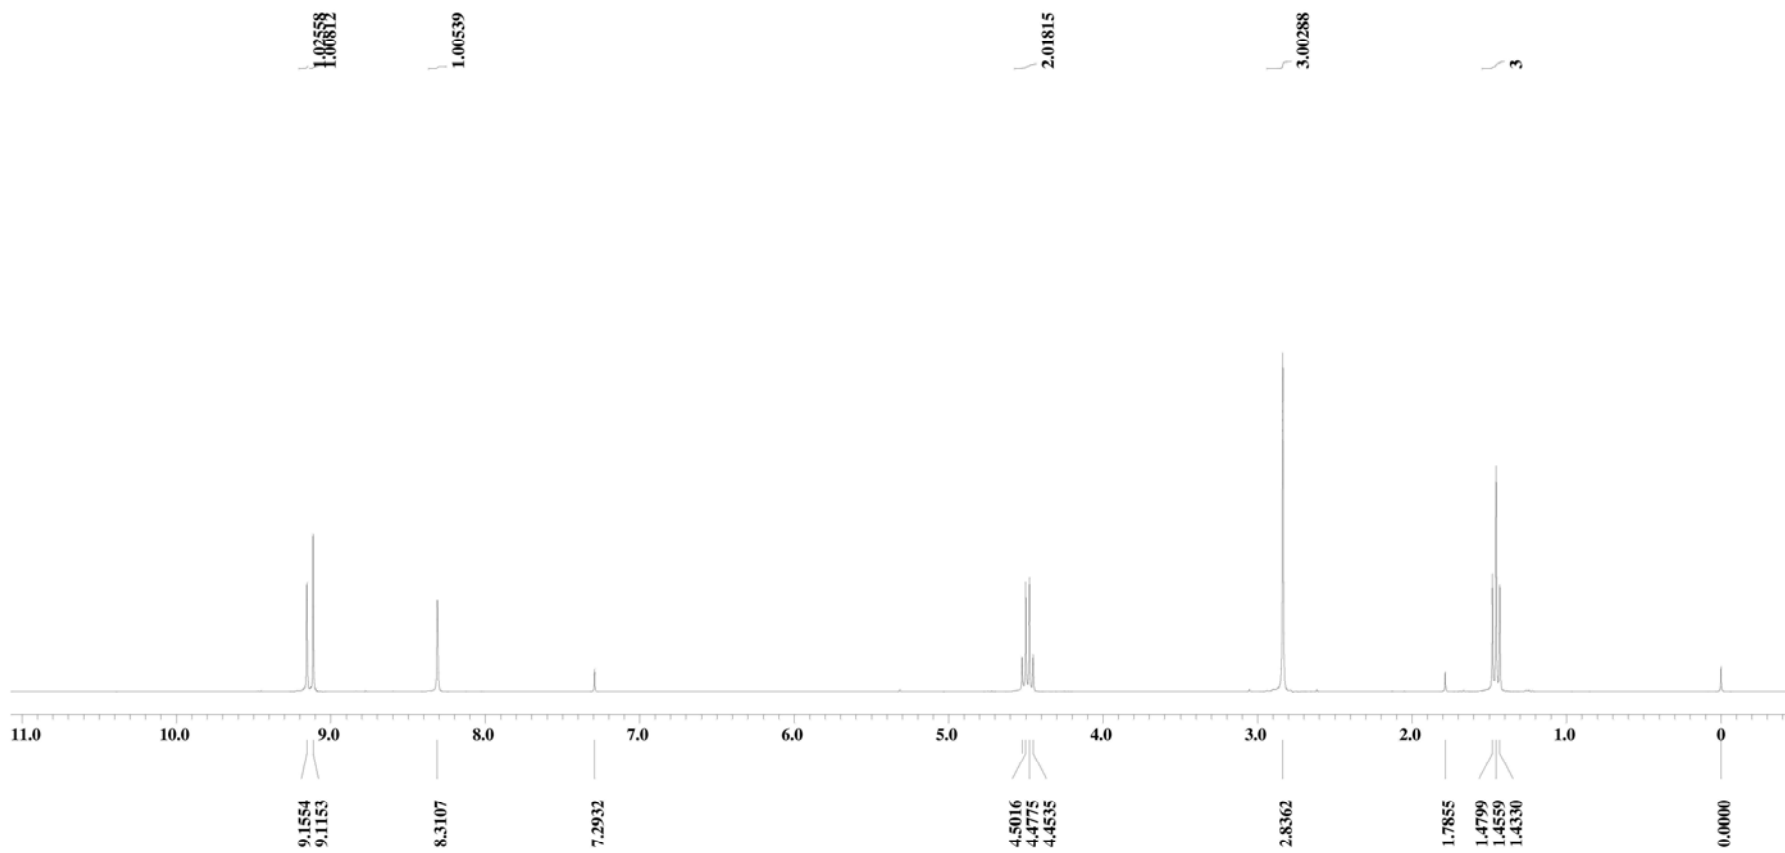

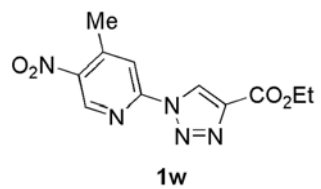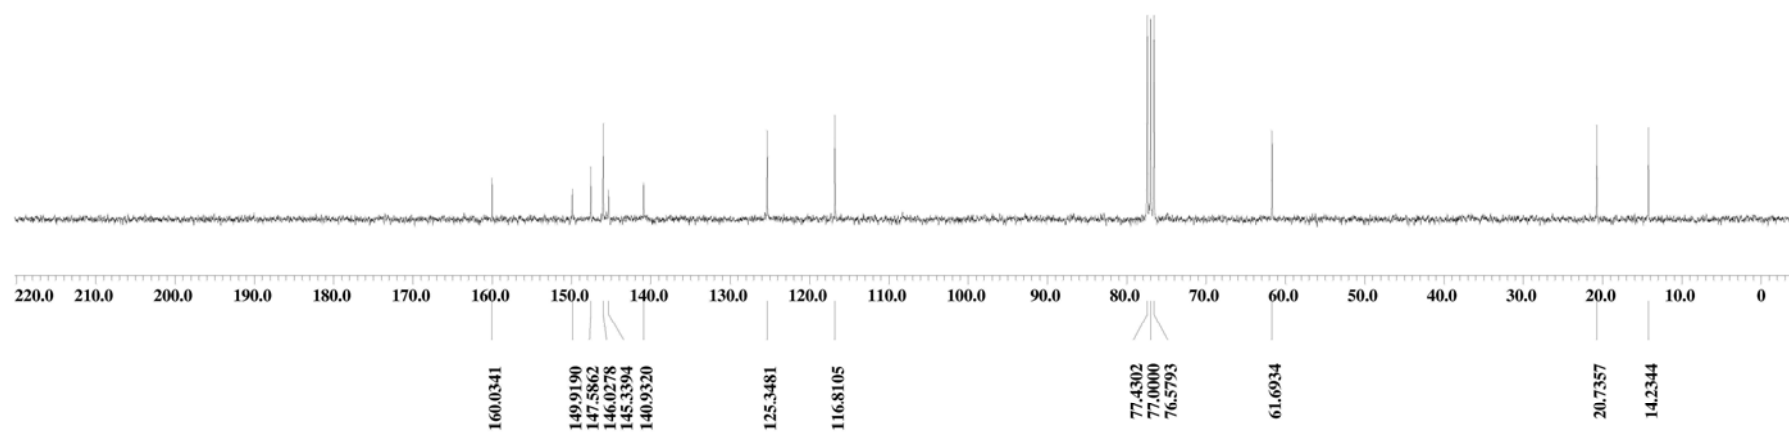



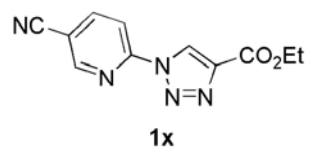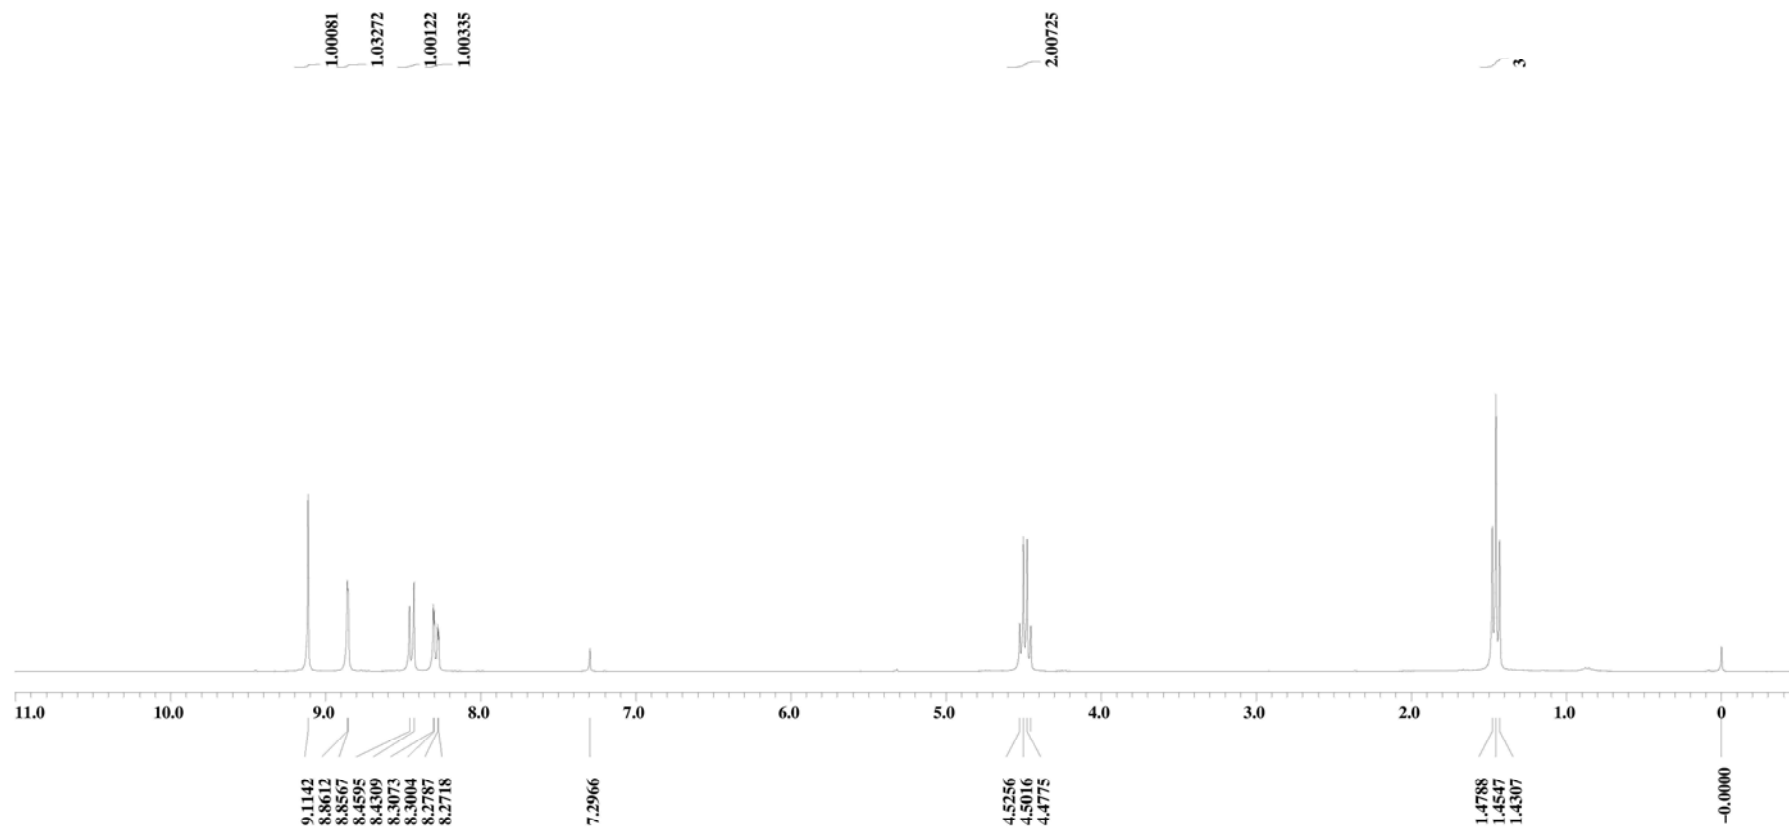

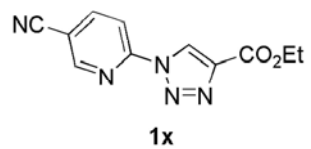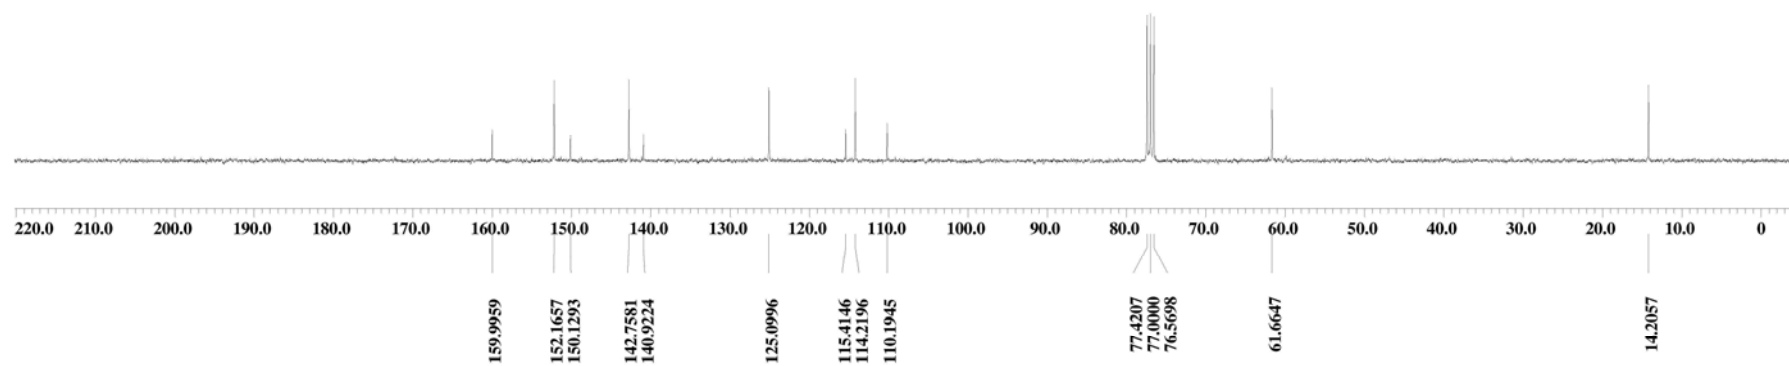

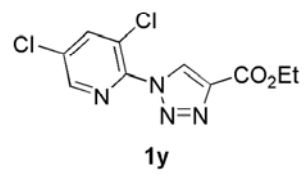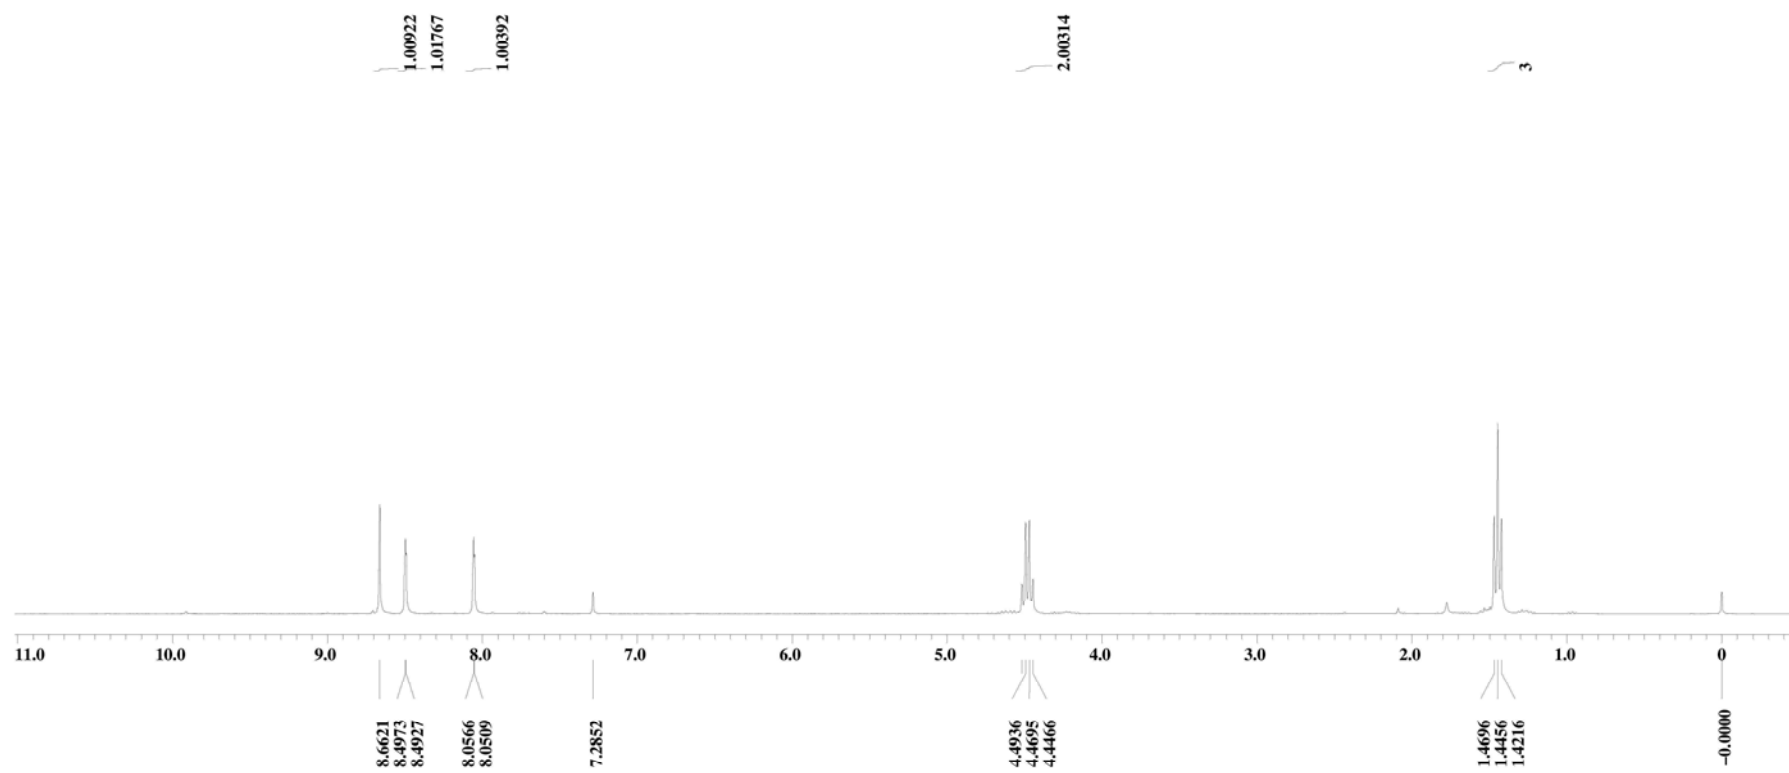

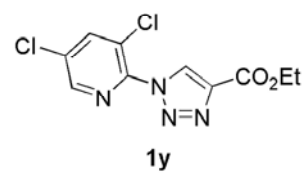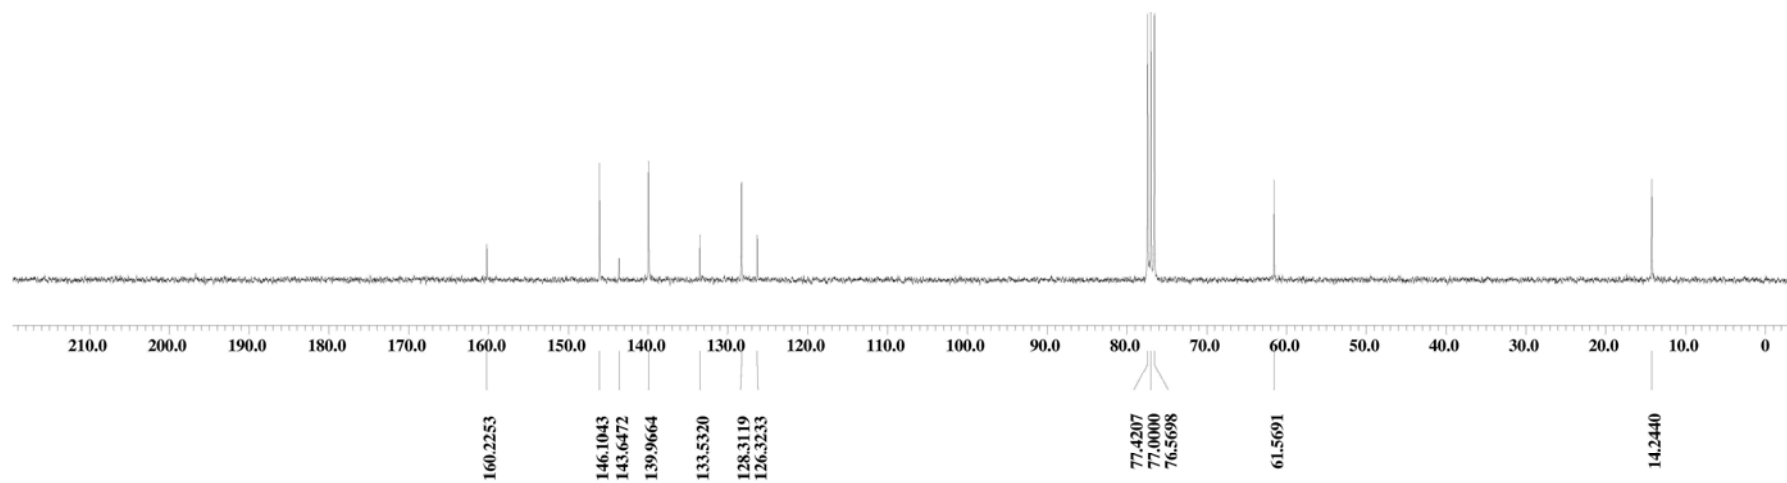

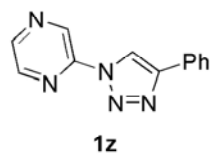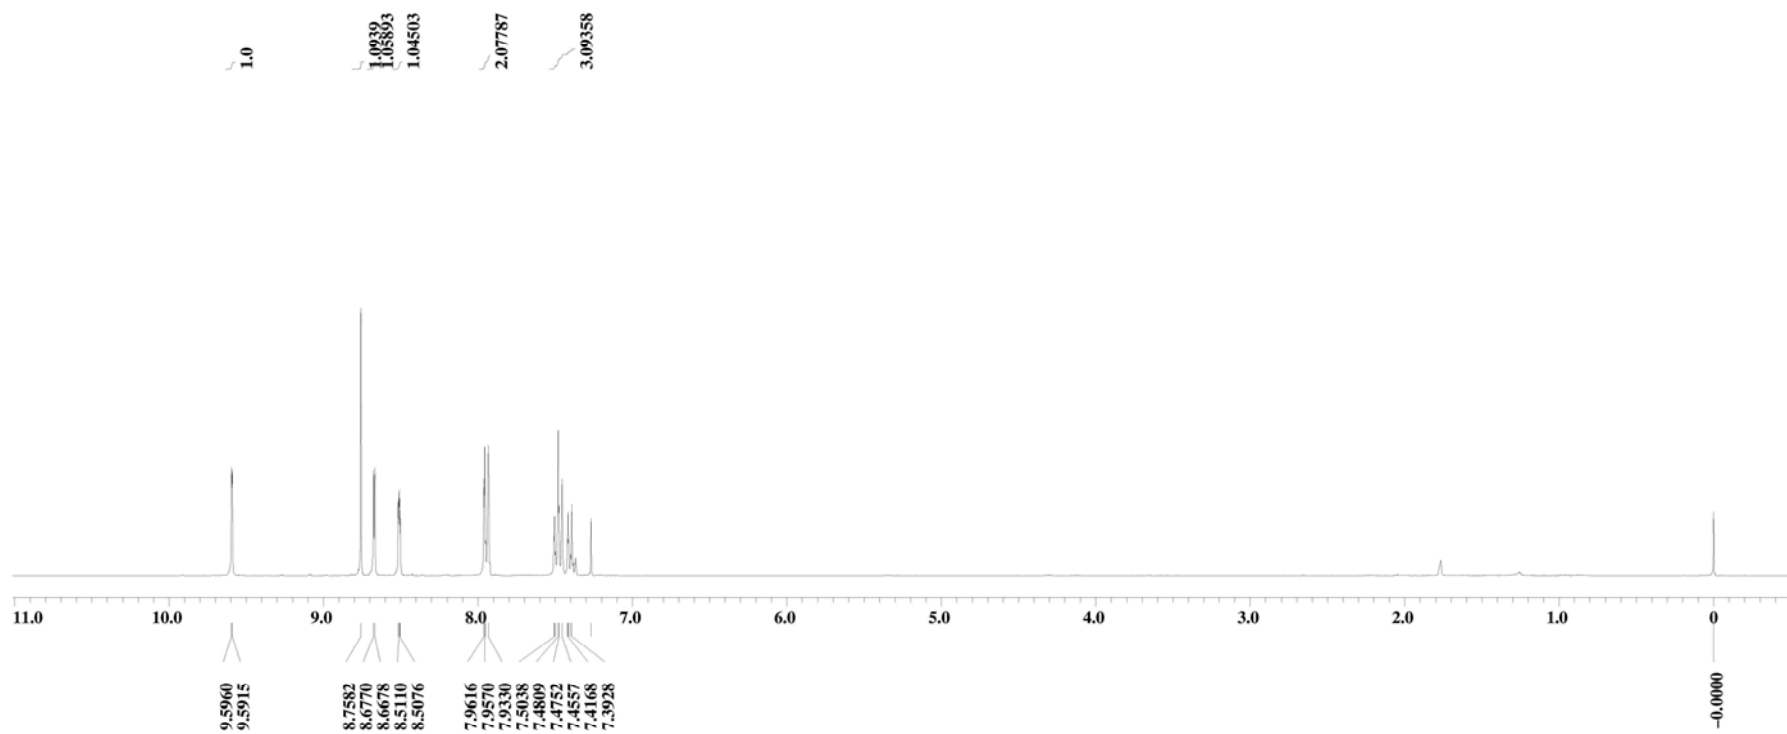

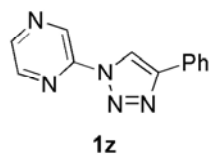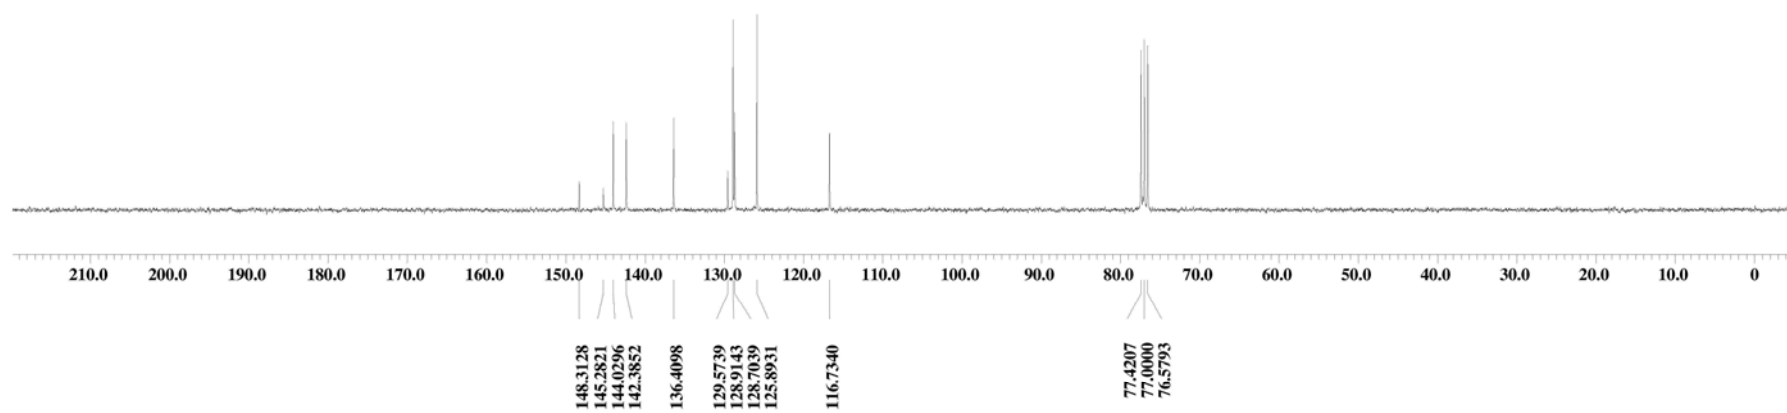

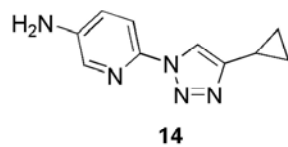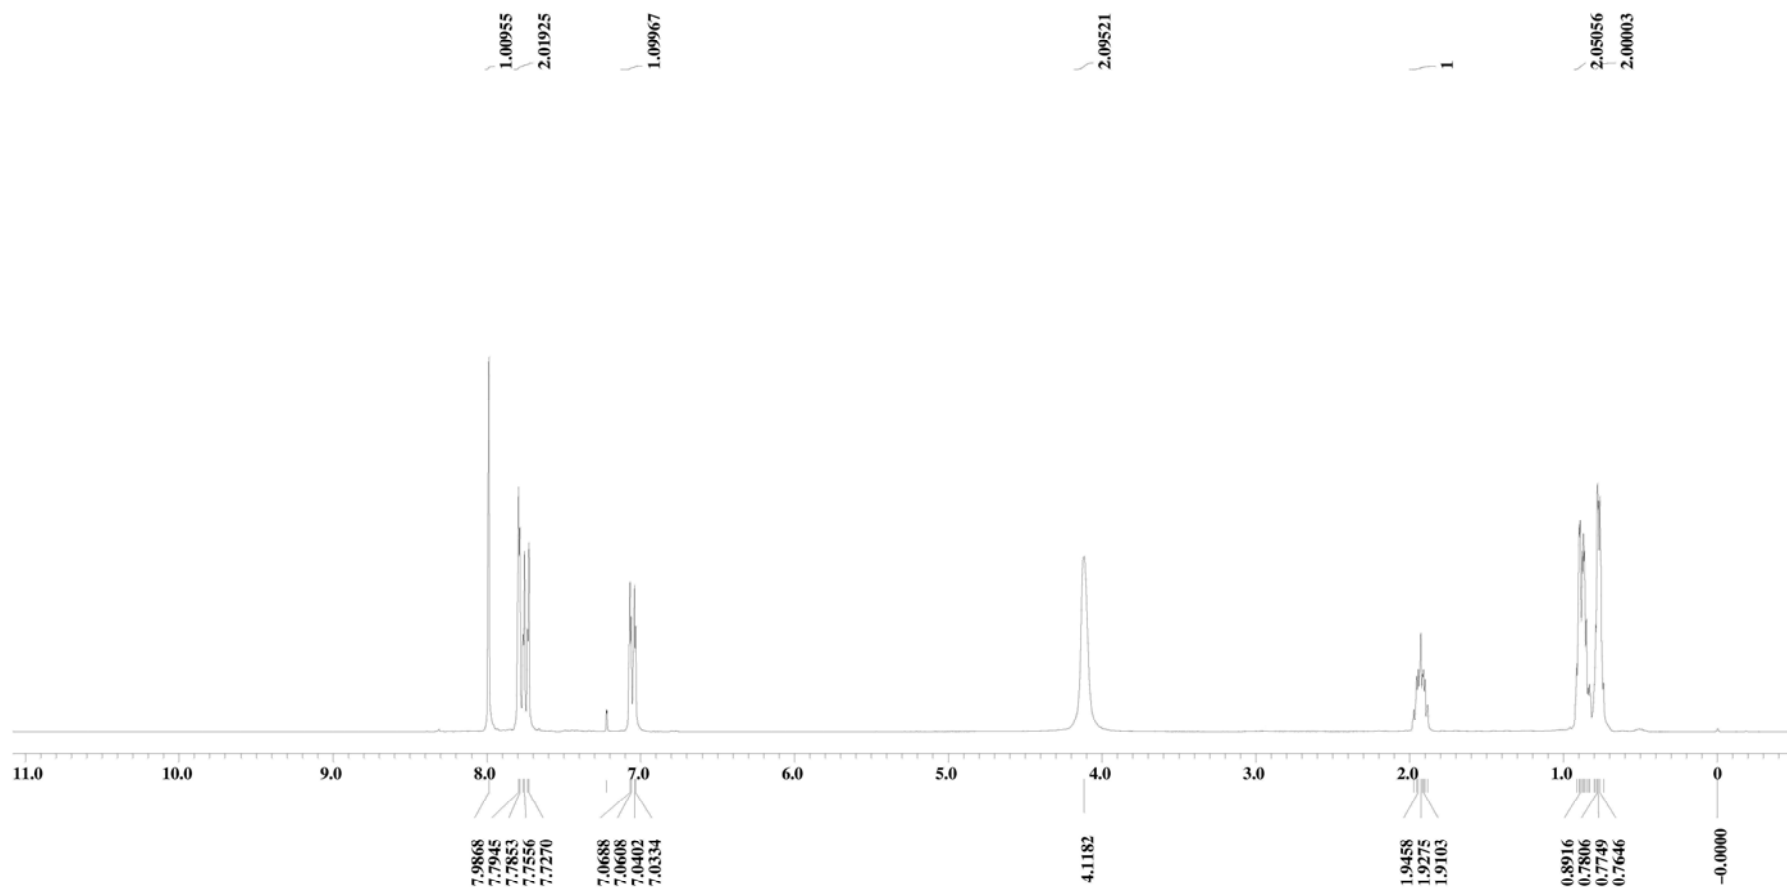

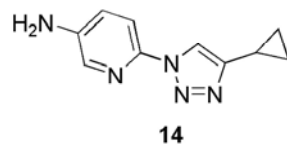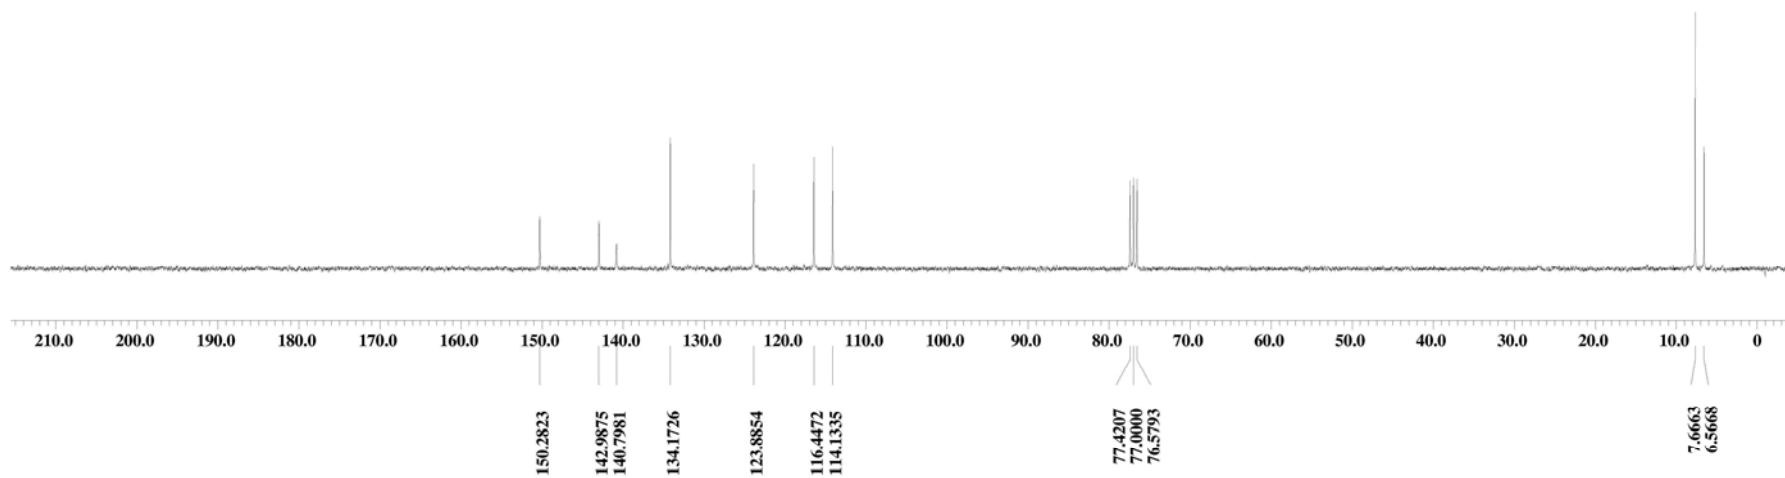



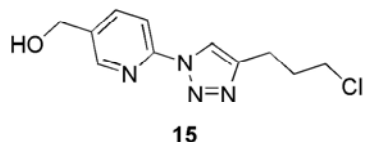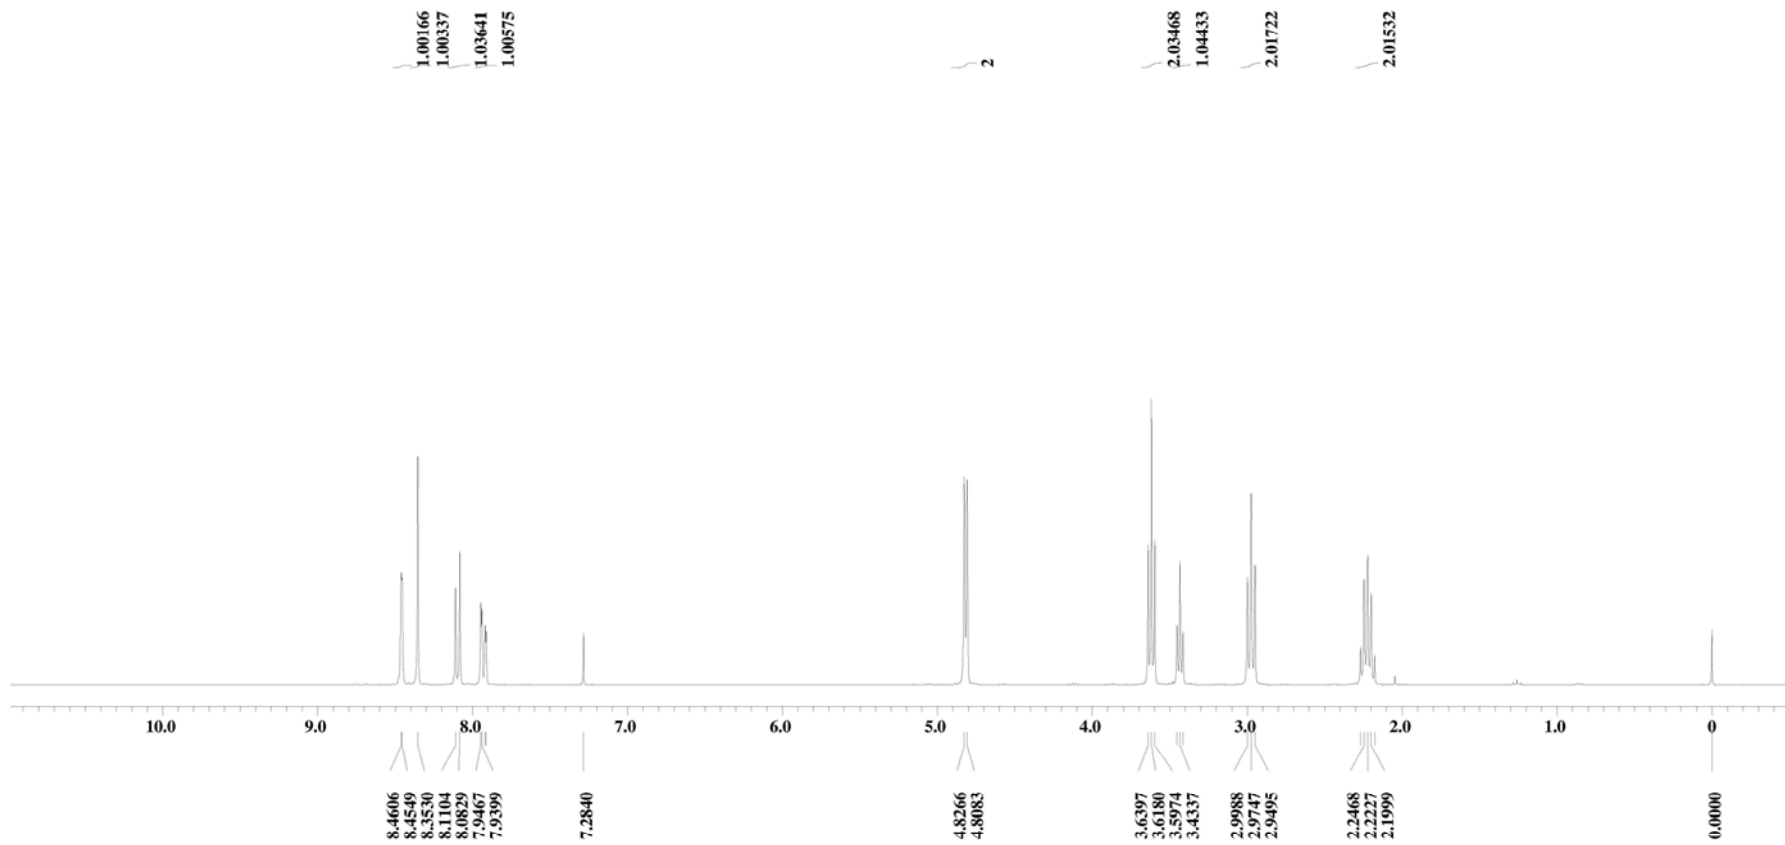

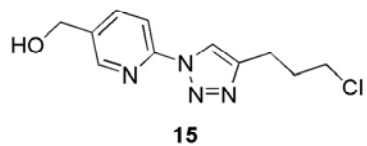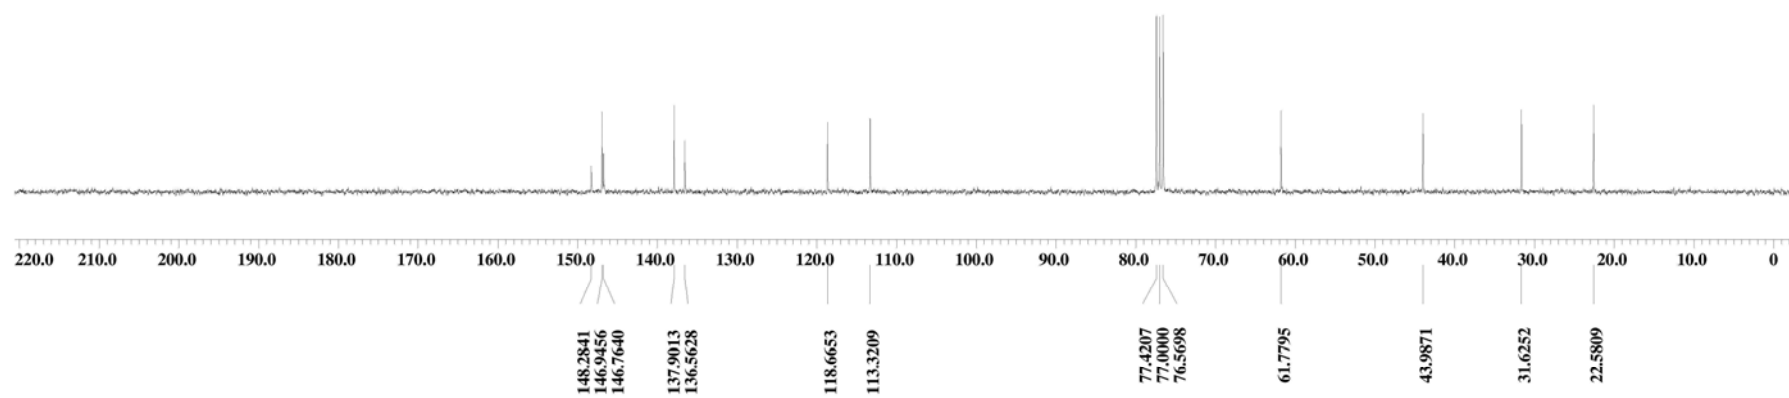

Supplement: c2ob06942c.pdf [file c2ob06942c.pdf]
